# Supplementary material
Source: PubMed Central journal article supplement (PMC3404226)
Supplement: NIHMS372271-supplement-01.pdf [file NIHMS372271-supplement-01.pdf]

**DOES MECHANISM MATTER?**  
**UNRELATED NEUROTOXICANTS CONVERGE ON CELL CYCLE**  
**AND APOPTOSIS DURING NEURODIFFERENTIATION**

Theodore A. Slotkin and Frederic J. Seidler  
Department of Pharmacology & Cancer Biology  
Duke University Medical Center  
Durham, North Carolina USA

**SUPPLEMENTAL TABLES**

Supplemental Table 1. Cell Cycle Genes

| Gene            | Control     |             | Diazinon |              | Dieldrin     |    | Ni <sup>2+</sup> |              |    |              |              |
|-----------------|-------------|-------------|----------|--------------|--------------|----|------------------|--------------|----|--------------|--------------|
|                 | 24h         | 72h         |          | 24h          | 72h          |    | 24h              | 72h          |    | 24h          | 72h          |
| <i>aatf</i>     | 0.94 ± 0.02 | 1.03 ± 0.02 |          | 0.95 ± 0.02  | 1.03 ± 0.01  |    | 0.96 ± 0.02      | 1.05 ± 0.02  |    | 0.98 ± 0.03  | 1.05 ± 0.02  |
| <i>abl1</i>     | 1.00 ± 0.01 | 1.04 ± 0.01 | *        | 0.96 ± 0.02  | 0.99 ± 0.01  |    | 1.00 ± 0.01      | 1.02 ± 0.01  |    | 1.00 ± 0.02  | 1.01 ± 0.01  |
| <i>abtb1</i>    | 0.97 ± 0.04 | 1.11 ± 0.04 |          | 0.91 ± 0.03  | 1.11 ± 0.03  |    | 0.95 ± 0.04      | 1.04 ± 0.03  | *  | 0.90 ± 0.04  | 1.04 ± 0.03  |
| <i>acly</i>     | 1.04 ± 0.01 | 0.90 ± 0.01 | †        | 1.08 ± 0.01† | 0.89 ± 0.01  | *† | 1.13 ± 0.01†     | 0.91 ± 0.01  | *  | 1.12 ± 0.02  | 0.93 ± 0.01  |
| <i>acpp</i>     | 0.93 ± 0.10 | 1.09 ± 0.10 |          | 1.14 ± 0.11  | 0.97 ± 0.08  |    | 0.99 ± 0.10      | 1.13 ± 0.10  |    | 0.97 ± 0.09  | 1.08 ± 0.07  |
| <i>actn4</i>    | 1.02 ± 0.01 | 0.94 ± 0.03 |          | 1.03 ± 0.01  | 0.97 ± 0.02  |    | 1.03 ± 0.02      | 0.97 ± 0.01  |    | 1.03 ± 0.02  | 0.99 ± 0.03  |
| <i>adcyp1</i>   | 0.98 ± 0.06 | 0.97 ± 0.09 |          | 1.01 ± 0.04  | 1.01 ± 0.05  |    | 1.02 ± 0.07      | 1.01 ± 0.09  |    | 1.07 ± 0.05  | 1.12 ± 0.06  |
| <i>af092207</i> | 0.99 ± 0.01 | 1.12 ± 0.03 | *        | 0.96 ± 0.02  | 1.07 ± 0.01  | *  | 0.95 ± 0.02      | 1.01 ± 0.02  | *  | 0.94 ± 0.01  | 1.01 ± 0.02  |
| <i>ahr</i>      | 1.19 ± 0.10 | 0.85 ± 0.06 | *        | 0.87 ± 0.06  | 0.75 ± 0.05  |    | 1.23 ± 0.15      | 1.10 ± 0.05  |    | 1.07 ± 0.10  | 1.04 ± 0.09  |
| <i>ak1</i>      | 0.93 ± 0.02 | 1.09 ± 0.04 |          | 0.89 ± 0.04  | 1.09 ± 0.02  |    | 0.97 ± 0.02      | 1.15 ± 0.03  | *  | 0.85 ± 0.05  | 1.00 ± 0.02  |
| <i>akt1</i>     | 1.08 ± 0.04 | 0.96 ± 0.02 | †        | 1.02 ± 0.03  | 1.04 ± 0.03  |    | 1.12 ± 0.03      | 1.00 ± 0.02  |    | 1.00 ± 0.04  | 0.96 ± 0.04  |
| <i>akt2</i>     | 1.08 ± 0.04 | 0.79 ± 0.05 | *†       | 1.12 ± 0.02  | 0.97 ± 0.04† | *† | 1.07 ± 0.02      | 0.95 ± 0.03† | †  | 0.98 ± 0.02  | 0.96 ± 0.05† |
| <i>anapc2</i>   | 0.97 ± 0.01 | 1.05 ± 0.02 |          | 0.96 ± 0.01  | 1.05 ± 0.02  |    | 0.97 ± 0.02      | 1.08 ± 0.02  |    | 0.97 ± 0.02  | 1.02 ± 0.01  |
| <i>anapc4</i>   | 1.07 ± 0.02 | 0.93 ± 0.03 |          | 1.07 ± 0.03  | 0.98 ± 0.02  |    | 1.05 ± 0.02      | 0.94 ± 0.02  | †  | 1.00 ± 0.02  | 0.97 ± 0.02  |
| <i>anapc7</i>   | 1.11 ± 0.05 | 0.93 ± 0.04 |          | 1.03 ± 0.04  | 1.00 ± 0.03  |    | 1.07 ± 0.03      | 0.95 ± 0.04  | †  | 1.00 ± 0.04  | 1.01 ± 0.03  |
| <i>anxa1</i>    | 1.04 ± 0.03 | 0.86 ± 0.05 | *        | 1.10 ± 0.03  | 0.96 ± 0.04  | *  | 1.23 ± 0.04      | 1.01 ± 0.03  |    | 0.98 ± 0.04  | 0.89 ± 0.04  |
| <i>apbb1</i>    | 0.90 ± 0.01 | 1.13 ± 0.02 | *        | 0.88 ± 0.01  | 1.09 ± 0.01  | *† | 0.90 ± 0.01      | 1.08 ± 0.01† | *† | 0.90 ± 0.02  | 1.06 ± 0.01† |
| <i>apc</i>      | 0.95 ± 0.03 | 0.98 ± 0.04 |          | 1.03 ± 0.03  | 1.00 ± 0.02  |    | 0.98 ± 0.02      | 1.04 ± 0.04  | *  | 1.02 ± 0.05  | 1.06 ± 0.04  |
| <i>apex2</i>    | 1.30 ± 0.16 | 1.32 ± 0.18 | *        | 0.95 ± 0.11  | 0.94 ± 0.13  | *  | 0.99 ± 0.09      | 0.85 ± 0.03  | *† | 1.38 ± 0.22  | 0.68 ± 0.05† |
| <i>appbp1</i>   | 1.15 ± 0.02 | 0.91 ± 0.03 |          | 1.16 ± 0.01  | 0.94 ± 0.02  |    | 1.12 ± 0.03      | 0.92 ± 0.01  |    | 1.10 ± 0.03  | 0.91 ± 0.02  |
| <i>araf1</i>    | 0.98 ± 0.02 | 0.99 ± 0.03 | *        | 1.02 ± 0.01  | 1.06 ± 0.02  | *  | 1.03 ± 0.02      | 1.04 ± 0.01  | *  | 0.92 ± 0.02  | 0.96 ± 0.03  |
| <i>arg1</i>     | 0.77 ± 0.09 | 1.46 ± 0.15 | †        | 0.96 ± 0.09  | 0.90 ± 0.07† |    | 0.84 ± 0.10      | 1.25 ± 0.09  | *† | 0.78 ± 0.05  | 0.94 ± 0.06† |
| <i>arhe</i>     | 0.81 ± 0.06 | 1.08 ± 0.07 | *†       | 0.85 ± 0.08  | 1.55 ± 0.09† | †  | 0.81 ± 0.09      | 1.34 ± 0.09† | †  | 0.74 ± 0.07  | 1.33 ± 0.07† |
| <i>atm</i>      | 1.21 ± 0.06 | 0.97 ± 0.05 | *        | 1.06 ± 0.05  | 0.91 ± 0.04  | *  | 1.04 ± 0.02      | 0.91 ± 0.04  | *  | 1.09 ± 0.07  | 0.86 ± 0.04  |
| <i>aurkb</i>    | 1.34 ± 0.02 | 0.85 ± 0.03 |          | 1.30 ± 0.01  | 0.86 ± 0.01  | *  | 1.26 ± 0.02      | 0.78 ± 0.02  |    | 1.31 ± 0.03  | 0.89 ± 0.02  |
| <i>axin2</i>    | 1.20 ± 0.09 | 0.92 ± 0.07 |          | 1.04 ± 0.05  | 0.87 ± 0.06  |    | 1.18 ± 0.10      | 0.84 ± 0.06  |    | 1.19 ± 0.07  | 0.97 ± 0.07  |
| <i>bcar3</i>    | 1.11 ± 0.18 | 1.15 ± 0.11 |          | 1.28 ± 0.08  | 0.93 ± 0.09  |    | 1.12 ± 0.09      | 0.86 ± 0.08  | *  | 0.82 ± 0.07  | 0.87 ± 0.07  |
| <i>bcl10</i>    | 1.09 ± 0.02 | 0.89 ± 0.01 |          | 1.14 ± 0.02  | 0.89 ± 0.01  |    | 1.08 ± 0.02      | 0.90 ± 0.01  | *  | 1.25 ± 0.03  | 0.98 ± 0.02  |
| <i>bcl3</i>     | 1.04 ± 0.04 | 1.12 ± 0.05 |          | 0.97 ± 0.03  | 1.09 ± 0.03  | *  | 0.98 ± 0.04      | 1.00 ± 0.04  | *  | 0.81 ± 0.02  | 0.87 ± 0.03  |
| <i>bin1</i>     | 0.91 ± 0.02 | 1.05 ± 0.02 | *        | 0.95 ± 0.03  | 1.10 ± 0.01  | *  | 0.95 ± 0.02      | 1.15 ± 0.02  |    | 0.91 ± 0.01  | 1.10 ± 0.02  |
| <i>bin3</i>     | 1.03 ± 0.03 | 0.83 ± 0.04 | *        | 1.11 ± 0.03  | 0.95 ± 0.03  | *† | 1.07 ± 0.02      | 0.97 ± 0.01† |    | 1.04 ± 0.03  | 0.88 ± 0.02  |
| <i>bmyc</i>     | 0.95 ± 0.03 | 1.07 ± 0.02 |          | 0.95 ± 0.04  | 1.01 ± 0.02  |    | 0.92 ± 0.04      | 1.06 ± 0.04  |    | 0.98 ± 0.02  | 1.08 ± 0.03  |
| <i>brca1</i>    | 1.26 ± 0.03 | 0.81 ± 0.04 |          | 1.17 ± 0.03  | 0.78 ± 0.05  | *  | 1.12 ± 0.03      | 0.79 ± 0.02  |    | 1.10 ± 0.03  | 0.83 ± 0.07  |
| <i>brinp2</i>   | 1.11 ± 0.03 | 1.65 ± 0.07 | *        | 1.70 ± 0.05  | 1.01 ± 0.03  | *† | 1.01 ± 0.04      | 1.08 ± 0.03† | *† | 0.94 ± 0.04† | 0.93 ± 0.03† |
| <i>brinp3</i>   | 1.00 ± 0.09 | 1.10 ± 0.10 |          | 1.04 ± 0.11  | 0.93 ± 0.07  |    | 0.94 ± 0.06      | 1.14 ± 0.10  |    | 0.93 ± 0.06  | 0.96 ± 0.04  |
| <i>btc</i>      | 1.05 ± 0.14 | 1.07 ± 0.09 |          | 1.08 ± 0.12  | 0.94 ± 0.08  |    | 0.89 ± 0.06      | 1.14 ± 0.08  |    | 1.01 ± 0.13  | 1.04 ± 0.07  |
| <i>btg3</i>     | 0.88 ± 0.01 | 1.00 ± 0.03 | *        | 0.96 ± 0.02  | 1.11 ± 0.02  | *  | 0.95 ± 0.02      | 1.18 ± 0.03  | *† | 0.88 ± 0.02  | 1.12 ± 0.02† |
| <i>bwk-2</i>    | 1.00 ± 0.01 | 1.02 ± 0.01 |          | 1.02 ± 0.01  | 0.99 ± 0.02  | *† | 0.99 ± 0.02      | 0.93 ± 0.02† |    | 1.03 ± 0.03  | 1.00 ± 0.02  |
| <i>bzw1</i>     | 1.01 ± 0.01 | 0.95 ± 0.01 | *        | 1.05 ± 0.01  | 0.98 ± 0.01  | *  | 1.04 ± 0.01      | 0.98 ± 0.01  | *† | 1.04 ± 0.01  | 1.03 ± 0.01† |
| <i>cables1</i>  | 0.92 ± 0.05 | 1.00 ± 0.06 |          | 0.97 ± 0.05  | 1.07 ± 0.04  | *  | 1.00 ± 0.05      | 1.08 ± 0.04  |    | 0.96 ± 0.08  | 0.97 ± 0.04  |
| <i>calm1</i>    | 0.94 ± 0.01 | 1.15 ± 0.01 | *        | 0.91 ± 0.01  | 1.11 ± 0.02  |    | 0.95 ± 0.02      | 1.13 ± 0.02  | *  | 0.93 ± 0.02  | 1.09 ± 0.02  |
| <i>calm2</i>    | 1.00 ± 0.02 | 1.14 ± 0.03 |          | 0.98 ± 0.02  | 1.12 ± 0.02  | *† | 0.96 ± 0.02      | 0.99 ± 0.02† | *  | 0.96 ± 0.01  | 1.04 ± 0.02  |
| <i>calm3</i>    | 1.15 ± 0.01 | 0.87 ± 0.01 |          | 1.16 ± 0.02  | 0.87 ± 0.01  |    | 1.14 ± 0.01      | 0.84 ± 0.01  | *  | 1.18 ± 0.01  | 0.90 ± 0.01  |
| <i>camk2a</i>   | 1.16 ± 0.10 | 1.11 ± 0.10 |          | 1.04 ± 0.16  | 1.00 ± 0.10  | *  | 0.79 ± 0.09      | 0.99 ± 0.13  |    | 1.20 ± 0.12  | 0.88 ± 0.08  |
| <i>camk2b</i>   | 1.03 ± 0.09 | 0.89 ± 0.02 |          | 1.07 ± 0.03  | 0.87 ± 0.04  | *  | 1.16 ± 0.05      | 1.01 ± 0.06  | †  | 0.93 ± 0.08  | 1.34 ± 0.12† |
| <i>camk2d</i>   | 1.02 ± 0.03 | 0.97 ± 0.05 | *        | 1.06 ± 0.03  | 1.06 ± 0.03  |    | 1.05 ± 0.03      | 0.98 ± 0.03  | *  | 0.93 ± 0.03  | 0.87 ± 0.03  |
| <i>camk2g</i>   | 0.94 ± 0.02 | 1.04 ± 0.03 | *        | 0.95 ± 0.01  | 1.12 ± 0.02  | *  | 0.98 ± 0.02      | 1.14 ± 0.03  | *  | 0.95 ± 0.02  | 1.12 ± 0.02  |
| <i>casp3</i>    | 0.94 ± 0.01 | 1.12 ± 0.02 |          | 0.92 ± 0.01  | 1.14 ± 0.02  |    | 0.94 ± 0.01      | 1.11 ± 0.01  | *  | 0.88 ± 0.02  | 1.06 ± 0.02  |
| <i>ccnb1</i>    | 1.17 ± 0.01 | 0.86 ± 0.01 |          | 1.12 ± 0.02  | 0.86 ± 0.01  | *  | 1.10 ± 0.02      | 0.80 ± 0.01  | †  | 1.12 ± 0.02† | 0.88 ± 0.02  |
| <i>ccnc</i>     | 0.91 ± 0.05 | 1.09 ± 0.04 |          | 0.96 ± 0.06  | 1.18 ± 0.03  |    | 0.90 ± 0.05      | 1.00 ± 0.03  | †  | 0.77 ± 0.05  | 1.18 ± 0.05  |
| <i>ccnd1</i>    | 0.76 ± 0.02 | 1.46 ± 0.04 | *        | 0.79 ± 0.01  | 1.56 ± 0.01  | *† | 0.80 ± 0.01      | 1.68 ± 0.02† | *  | 0.63 ± 0.01  | 1.25 ± 0.03  |
| <i>ccnd2</i>    | 1.07 ± 0.16 | 1.35 ± 0.35 |          | 0.94 ± 0.14  | 1.06 ± 0.11  |    | 0.93 ± 0.09      | 1.08 ± 0.04  |    | 1.06 ± 0.10  | 0.99 ± 0.11  |
| <i>ccnd3</i>    | 0.98 ± 0.03 | 1.03 ± 0.03 |          | 0.92 ± 0.04  | 1.06 ± 0.02  |    | 0.98 ± 0.02      | 0.99 ± 0.02  |    | 0.96 ± 0.02  | 1.08 ± 0.05  |
| <i>ccne</i>     | 1.16 ± 0.02 | 0.94 ± 0.03 | *        | 1.08 ± 0.03  | 0.92 ± 0.02  | *  | 1.12 ± 0.02      | 0.86 ± 0.01  | *† | 1.03 ± 0.03† | 0.96 ± 0.02  |
| <i>ccne2</i>    | 1.20 ± 0.06 | 0.92 ± 0.05 |          | 1.18 ± 0.06  | 0.86 ± 0.03  | *  | 1.07 ± 0.06      | 0.81 ± 0.05  |    | 1.27 ± 0.07  | 0.98 ± 0.05  |

Supplemental Table 1 (continued)

|                |             |             |    |              |              |    |              |              |    |              |              |
|----------------|-------------|-------------|----|--------------|--------------|----|--------------|--------------|----|--------------|--------------|
| <i>ccnf</i>    | 1.30 ± 0.02 | 0.95 ± 0.02 | *  | 1.19 ± 0.04  | 0.90 ± 0.02  | *† | 1.24 ± 0.03  | 0.81 ± 0.01† | *  | 1.12 ± 0.03  | 0.86 ± 0.01  |
| <i>ccng1</i>   | 0.76 ± 0.01 | 1.39 ± 0.03 | *  | 0.80 ± 0.01  | 1.54 ± 0.02  |    | 0.75 ± 0.01  | 1.38 ± 0.01  | †  | 0.71 ± 0.01† | 1.52 ± 0.03† |
| <i>ccng2</i>   | 0.87 ± 0.03 | 1.12 ± 0.10 |    | 0.80 ± 0.05  | 1.10 ± 0.04  |    | 0.82 ± 0.06  | 1.09 ± 0.03  | *  | 0.91 ± 0.05  | 1.38 ± 0.06  |
| <i>ccnh</i>    | 1.03 ± 0.01 | 0.93 ± 0.02 | *  | 1.07 ± 0.01  | 0.96 ± 0.01  | *† | 1.02 ± 0.02  | 1.00 ± 0.01† | †  | 1.02 ± 0.02  | 0.99 ± 0.02† |
| <i>ccni</i>    | 0.87 ± 0.03 | 1.19 ± 0.04 | *  | 0.81 ± 0.02  | 1.01 ± 0.03  |    | 0.84 ± 0.03  | 1.17 ± 0.05  |    | 0.96 ± 0.07  | 1.19 ± 0.03  |
| <i>ccnj</i>    | 1.25 ± 0.14 | 1.46 ± 0.09 | *  | 1.14 ± 0.12  | 1.01 ± 0.11  | *  | 0.97 ± 0.11  | 1.11 ± 0.14  | *  | 0.85 ± 0.10  | 0.95 ± 0.05  |
| <i>ccnt2</i>   | 1.00 ± 0.03 | 0.89 ± 0.05 | *† | 0.93 ± 0.03  | 1.14 ± 0.04† | †  | 0.99 ± 0.04  | 1.04 ± 0.03† |    | 0.95 ± 0.03  | 0.96 ± 0.03  |
| <i>ccpg1</i>   | 0.89 ± 0.01 | 1.13 ± 0.03 | *  | 0.84 ± 0.01  | 1.07 ± 0.01  | *  | 0.95 ± 0.01  | 1.20 ± 0.02  |    | 0.87 ± 0.02  | 1.10 ± 0.02  |
| <i>ccrk</i>    | 1.10 ± 0.03 | 0.94 ± 0.05 | †  | 1.03 ± 0.03  | 1.01 ± 0.03  |    | 1.12 ± 0.05  | 0.99 ± 0.01  | †  | 0.98 ± 0.03† | 0.97 ± 0.05  |
| <i>cct2</i>    | 1.04 ± 0.01 | 0.97 ± 0.02 | †  | 1.00 ± 0.01  | 0.99 ± 0.01  |    | 1.03 ± 0.02  | 1.01 ± 0.02  | *  | 0.97 ± 0.02  | 0.95 ± 0.02  |
| <i>cct7</i>    | 1.05 ± 0.03 | 0.96 ± 0.04 |    | 1.03 ± 0.02  | 1.06 ± 0.02  |    | 1.07 ± 0.03  | 0.97 ± 0.02  | †  | 0.95 ± 0.04  | 0.99 ± 0.03  |
| <i>cdc10</i>   | 1.04 ± 0.03 | 1.09 ± 0.03 |    | 1.06 ± 0.04  | 0.98 ± 0.02  | *† | 1.02 ± 0.04  | 0.89 ± 0.03† | †  | 1.15 ± 0.04† | 0.99 ± 0.03† |
| <i>cdc14a</i>  | 1.13 ± 0.09 | 0.88 ± 0.06 |    | 1.36 ± 0.15  | 0.92 ± 0.08  |    | 1.07 ± 0.09  | 0.99 ± 0.09  |    | 1.03 ± 0.07  | 0.96 ± 0.09  |
| <i>cdc16</i>   | 1.00 ± 0.01 | 1.00 ± 0.02 |    | 1.01 ± 0.01  | 0.98 ± 0.01  |    | 0.99 ± 0.02  | 0.97 ± 0.02  |    | 0.99 ± 0.02  | 1.02 ± 0.03  |
| <i>cdc20</i>   | 1.25 ± 0.01 | 0.86 ± 0.02 | *† | 1.13 ± 0.02† | 0.84 ± 0.01  | *  | 1.17 ± 0.01  | 0.80 ± 0.01  | †  | 1.18 ± 0.03  | 0.90 ± 0.01  |
| <i>cdc23</i>   | 1.02 ± 0.02 | 0.96 ± 0.01 | *† | 1.00 ± 0.02  | 1.07 ± 0.02† | †  | 1.00 ± 0.02  | 1.01 ± 0.01  |    | 1.00 ± 0.04  | 1.01 ± 0.02  |
| <i>cdc25a</i>  | 1.25 ± 0.19 | 1.11 ± 0.08 | *  | 0.95 ± 0.08  | 0.87 ± 0.05  |    | 1.01 ± 0.07  | 1.17 ± 0.09  | *  | 0.90 ± 0.09  | 0.94 ± 0.05  |
| <i>cdc25b</i>  | 1.10 ± 0.02 | 0.94 ± 0.02 |    | 1.07 ± 0.04  | 0.98 ± 0.02  | *  | 1.16 ± 0.04  | 0.99 ± 0.02  | *  | 0.99 ± 0.03  | 0.87 ± 0.02  |
| <i>cdc25c</i>  | 1.28 ± 0.04 | 0.92 ± 0.04 | *  | 1.17 ± 0.05  | 0.88 ± 0.03  | *  | 1.15 ± 0.05  | 0.74 ± 0.05  | *† | 1.01 ± 0.06† | 0.94 ± 0.03  |
| <i>cdc27</i>   | 1.08 ± 0.08 | 0.82 ± 0.05 |    | 1.03 ± 0.06  | 0.97 ± 0.03  |    | 1.03 ± 0.04  | 0.98 ± 0.07  | †  | 1.02 ± 0.06  | 1.03 ± 0.07† |
| <i>cdc2a</i>   | 1.16 ± 0.01 | 0.87 ± 0.02 | *  | 1.10 ± 0.01  | 0.82 ± 0.01  | *† | 1.08 ± 0.01† | 0.75 ± 0.01† |    | 1.15 ± 0.02  | 0.88 ± 0.01  |
| <i>cdc211</i>  | 1.15 ± 0.08 | 1.17 ± 0.04 | *  | 0.94 ± 0.09  | 0.97 ± 0.05  | *  | 0.88 ± 0.04  | 1.00 ± 0.07  | *  | 0.89 ± 0.07  | 0.95 ± 0.08  |
| <i>cdc215</i>  | 1.05 ± 0.02 | 1.05 ± 0.02 | *  | 0.97 ± 0.03  | 0.96 ± 0.01  | †  | 1.06 ± 0.02  | 0.97 ± 0.03  | *  | 1.03 ± 0.03  | 0.98 ± 0.02  |
| <i>cdc34</i>   | 0.97 ± 0.03 | 0.98 ± 0.03 | †  | 0.91 ± 0.04  | 1.04 ± 0.02  | *  | 1.00 ± 0.02  | 1.06 ± 0.02  |    | 0.89 ± 0.03  | 0.99 ± 0.03  |
| <i>cdc37</i>   | 0.96 ± 0.03 | 1.01 ± 0.03 | †  | 0.91 ± 0.03  | 1.09 ± 0.02  |    | 0.98 ± 0.02  | 1.07 ± 0.01  | †  | 0.90 ± 0.02  | 1.06 ± 0.03  |
| <i>cdc37l</i>  | 1.00 ± 0.01 | 0.94 ± 0.02 | *  | 1.01 ± 0.01  | 0.98 ± 0.01  | *† | 1.02 ± 0.01  | 1.02 ± 0.01† | †  | 0.98 ± 0.03  | 1.00 ± 0.01† |
| <i>cdc40</i>   | 1.06 ± 0.05 | 0.96 ± 0.06 |    | 1.07 ± 0.03  | 0.87 ± 0.05  |    | 0.98 ± 0.05  | 0.89 ± 0.05  |    | 1.17 ± 0.09  | 0.99 ± 0.05  |
| <i>cdc42</i>   | 0.98 ± 0.01 | 1.02 ± 0.02 |    | 0.99 ± 0.01  | 0.99 ± 0.01  |    | 0.99 ± 0.01  | 1.02 ± 0.01  |    | 0.98 ± 0.01  | 1.03 ± 0.01  |
| <i>cdc5l</i>   | 1.00 ± 0.01 | 1.01 ± 0.03 |    | 1.00 ± 0.02  | 0.96 ± 0.02  |    | 1.02 ± 0.02  | 1.00 ± 0.01  |    | 0.99 ± 0.02  | 1.00 ± 0.01  |
| <i>cdc6</i>    | 1.24 ± 0.02 | 0.83 ± 0.03 | *  | 1.16 ± 0.03  | 0.77 ± 0.02  | *† | 1.23 ± 0.03  | 0.70 ± 0.02† |    | 1.24 ± 0.04  | 0.86 ± 0.02  |
| <i>cdc7</i>    | 1.17 ± 0.04 | 0.81 ± 0.04 | †  | 1.02 ± 0.03† | 0.94 ± 0.04† | †  | 1.10 ± 0.04  | 0.94 ± 0.04† | †  | 1.13 ± 0.06  | 0.97 ± 0.06† |
| <i>cdc9111</i> | 1.00 ± 0.02 | 1.00 ± 0.03 |    | 0.98 ± 0.03  | 1.04 ± 0.02  |    | 1.01 ± 0.02  | 1.01 ± 0.03  |    | 0.96 ± 0.02  | 1.03 ± 0.03  |
| <i>cdca1</i>   | 1.33 ± 0.01 | 0.77 ± 0.02 | *  | 1.19 ± 0.01  | 0.69 ± 0.01  | *† | 1.27 ± 0.02† | 0.65 ± 0.01† | *† | 1.35 ± 0.01  | 0.84 ± 0.01† |
| <i>cdca2</i>   | 1.23 ± 0.01 | 0.88 ± 0.01 | *  | 1.16 ± 0.01  | 0.83 ± 0.01  | *† | 1.21 ± 0.02  | 0.78 ± 0.01† | *  | 1.17 ± 0.02  | 0.86 ± 0.01  |
| <i>cdca3</i>   | 1.18 ± 0.03 | 0.93 ± 0.01 | *  | 1.12 ± 0.02  | 0.87 ± 0.02  | *  | 1.09 ± 0.02  | 0.82 ± 0.02  |    | 1.19 ± 0.04  | 0.88 ± 0.02  |
| <i>cdca4</i>   | 1.19 ± 0.01 | 0.94 ± 0.02 | *  | 1.13 ± 0.04  | 0.86 ± 0.01  | *  | 1.18 ± 0.02  | 0.88 ± 0.02  |    | 1.22 ± 0.04  | 0.92 ± 0.01  |
| <i>cdk2</i>    | 1.25 ± 0.04 | 0.91 ± 0.03 |    | 1.24 ± 0.04  | 0.85 ± 0.02  | *  | 1.24 ± 0.04  | 0.81 ± 0.03  |    | 1.24 ± 0.04  | 0.84 ± 0.03  |
| <i>cdk2ap1</i> | 1.07 ± 0.01 | 0.90 ± 0.01 |    | 1.06 ± 0.01  | 0.90 ± 0.01  |    | 1.06 ± 0.01  | 0.88 ± 0.01  | *† | 1.07 ± 0.01  | 0.94 ± 0.01† |
| <i>cdk4</i>    | 1.05 ± 0.02 | 0.91 ± 0.01 |    | 1.08 ± 0.01  | 0.91 ± 0.01  |    | 1.06 ± 0.02  | 0.95 ± 0.02  | *  | 1.03 ± 0.03  | 0.86 ± 0.02  |
| <i>cdk5</i>    | 0.92 ± 0.02 | 1.07 ± 0.03 | *  | 0.94 ± 0.02  | 1.16 ± 0.02  |    | 0.97 ± 0.03  | 1.09 ± 0.01  | *  | 0.81 ± 0.02  | 1.02 ± 0.02  |
| <i>cdk6</i>    | 1.15 ± 0.04 | 0.75 ± 0.03 | *  | 0.96 ± 0.05  | 0.71 ± 0.01  | *  | 1.05 ± 0.01  | 0.71 ± 0.02  | *† | 1.33 ± 0.05† | 1.12 ± 0.02† |
| <i>cdk7</i>    | 0.99 ± 0.01 | 1.02 ± 0.01 |    | 0.99 ± 0.01  | 1.02 ± 0.01  |    | 0.98 ± 0.01  | 1.00 ± 0.01  |    | 0.99 ± 0.02  | 1.05 ± 0.02  |
| <i>cdk9</i>    | 1.03 ± 0.02 | 0.94 ± 0.03 | †  | 1.03 ± 0.02  | 1.04 ± 0.02† |    | 1.06 ± 0.03  | 1.00 ± 0.02  | *  | 0.95 ± 0.02  | 0.93 ± 0.02  |
| <i>cdkn1a</i>  | 0.84 ± 0.02 | 1.31 ± 0.04 |    | 0.81 ± 0.04  | 1.32 ± 0.04  | *  | 0.77 ± 0.04  | 1.18 ± 0.03  | †  | 0.74 ± 0.06  | 1.44 ± 0.04  |
| <i>cdkn1b</i>  | 1.07 ± 0.03 | 1.04 ± 0.05 |    | 1.04 ± 0.03  | 1.07 ± 0.03  |    | 1.05 ± 0.04  | 1.00 ± 0.03  | *  | 0.98 ± 0.02  | 0.99 ± 0.02  |
| <i>cdkn1c</i>  | 1.03 ± 0.01 | 1.01 ± 0.02 | *  | 1.02 ± 0.03  | 0.96 ± 0.01  | *  | 0.99 ± 0.02  | 0.94 ± 0.02  |    | 1.06 ± 0.02  | 1.01 ± 0.02  |
| <i>cdkn2a</i>  | 1.08 ± 0.04 | 0.95 ± 0.04 |    | 1.09 ± 0.06  | 1.03 ± 0.03  |    | 0.98 ± 0.05  | 1.03 ± 0.04  | †  | 0.95 ± 0.05  | 1.01 ± 0.04  |
| <i>cdkn2b</i>  | 0.93 ± 0.07 | 1.03 ± 0.05 |    | 0.91 ± 0.06  | 0.99 ± 0.07  |    | 0.99 ± 0.09  | 1.02 ± 0.06  | †  | 1.21 ± 0.08† | 0.85 ± 0.09  |
| <i>cdkn2c</i>  | 1.13 ± 0.02 | 0.96 ± 0.02 |    | 1.12 ± 0.03  | 0.98 ± 0.01  |    | 1.12 ± 0.04  | 0.91 ± 0.01  | *  | 1.08 ± 0.04  | 0.83 ± 0.01  |
| <i>cdkn3</i>   | 1.11 ± 0.01 | 0.93 ± 0.02 | *  | 1.04 ± 0.01  | 0.87 ± 0.01  | *† | 1.05 ± 0.02  | 0.79 ± 0.01† | *† | 1.05 ± 0.01† | 0.93 ± 0.01  |
| <i>cgrf1</i>   | 0.95 ± 0.02 | 1.07 ± 0.02 | †  | 0.93 ± 0.02  | 1.17 ± 0.02† |    | 0.93 ± 0.01  | 1.10 ± 0.01  |    | 0.90 ± 0.01  | 1.09 ± 0.03  |
| <i>cgrf1</i>   | 1.01 ± 0.02 | 1.01 ± 0.04 |    | 0.98 ± 0.02  | 1.03 ± 0.01  | *  | 1.00 ± 0.02  | 0.93 ± 0.02  |    | 0.97 ± 0.01  | 1.05 ± 0.02  |
| <i>chek1</i>   | 1.22 ± 0.03 | 0.91 ± 0.02 |    | 1.26 ± 0.04  | 0.91 ± 0.01  |    | 1.20 ± 0.03  | 0.92 ± 0.03  |    | 1.20 ± 0.04  | 0.94 ± 0.02  |
| <i>chek2</i>   | 1.09 ± 0.02 | 0.92 ± 0.04 |    | 1.05 ± 0.02  | 0.91 ± 0.01  | *† | 1.08 ± 0.03  | 0.79 ± 0.02† |    | 1.04 ± 0.02  | 0.94 ± 0.03  |
| <i>ches1</i>   | 0.94 ± 0.01 | 1.09 ± 0.02 |    | 0.93 ± 0.01  | 1.07 ± 0.02  | *  | 0.96 ± 0.02  | 1.16 ± 0.02  |    | 0.93 ± 0.01  | 1.10 ± 0.01  |
| <i>chfr</i>    | 0.92 ± 0.02 | 1.13 ± 0.05 |    | 0.89 ± 0.03  | 1.13 ± 0.01  |    | 0.93 ± 0.01  | 1.18 ± 0.04  |    | 0.94 ± 0.05  | 1.08 ± 0.03  |
| <i>ciz1</i>    | 1.07 ± 0.03 | 0.98 ± 0.02 |    | 1.02 ± 0.02  | 1.03 ± 0.02  |    | 1.10 ± 0.02  | 1.00 ± 0.02  | *  | 0.96 ± 0.02  | 0.87 ± 0.02  |
| <i>clk</i>     | 1.18 ± 0.06 | 0.90 ± 0.08 |    | 1.14 ± 0.04  | 0.94 ± 0.04  |    | 1.08 ± 0.04  | 0.82 ± 0.03  |    | 1.05 ± 0.03  | 0.93 ± 0.03  |

Supplemental Table 1 (continued)

|                 |             |             |    |              |              |    |              |              |    |              |              |
|-----------------|-------------|-------------|----|--------------|--------------|----|--------------|--------------|----|--------------|--------------|
| <i>clk1</i>     | 1.07 ± 0.02 | 1.01 ± 0.03 |    | 1.04 ± 0.03  | 0.98 ± 0.01  | *  | 1.02 ± 0.02  | 0.93 ± 0.02  | *  | 1.05 ± 0.01  | 0.96 ± 0.01  |
| <i>commd5</i>   | 1.03 ± 0.01 | 0.99 ± 0.02 |    | 1.04 ± 0.01  | 1.00 ± 0.01  |    | 1.05 ± 0.02  | 0.96 ± 0.01  | †  | 0.95 ± 0.02† | 1.00 ± 0.02  |
| <i>cort</i>     | 1.16 ± 0.02 | 0.82 ± 0.02 |    | 1.17 ± 0.04  | 0.84 ± 0.04  | *  | 1.09 ± 0.04  | 0.79 ± 0.03  |    | 1.17 ± 0.04  | 0.77 ± 0.02  |
| <i>crk</i>      | 1.00 ± 0.02 | 0.81 ± 0.05 | *  | 1.07 ± 0.05  | 0.96 ± 0.01  | *  | 1.03 ± 0.03  | 0.94 ± 0.03  | †  | 0.95 ± 0.05  | 1.03 ± 0.04† |
| <i>csf1r</i>    | 0.79 ± 0.12 | 1.10 ± 0.17 |    | 0.98 ± 0.09  | 1.19 ± 0.17  |    | 0.91 ± 0.17  | 1.15 ± 0.17  |    | 0.98 ± 0.11  | 0.92 ± 0.09  |
| <i>csnk1d</i>   | 1.03 ± 0.03 | 0.87 ± 0.04 | †  | 1.01 ± 0.02  | 0.99 ± 0.02† | *† | 1.04 ± 0.03  | 0.99 ± 0.02† | *† | 0.99 ± 0.02  | 1.10 ± 0.03† |
| <i>csnk2a2</i>  | 1.04 ± 0.02 | 0.95 ± 0.02 |    | 1.05 ± 0.03  | 0.91 ± 0.01  |    | 1.04 ± 0.02  | 0.92 ± 0.01  | *  | 1.12 ± 0.02  | 0.99 ± 0.02  |
| <i>cspg6</i>    | 1.18 ± 0.02 | 0.87 ± 0.04 | †  | 1.15 ± 0.01  | 0.94 ± 0.02  |    | 1.15 ± 0.02  | 0.90 ± 0.01  | †  | 1.11 ± 0.04  | 0.95 ± 0.02  |
| <i>ctcf</i>     | 1.15 ± 0.02 | 0.92 ± 0.02 | *  | 1.07 ± 0.04  | 0.83 ± 0.01  | *  | 1.09 ± 0.02  | 0.85 ± 0.01  | *  | 1.10 ± 0.02  | 0.82 ± 0.01  |
| <i>cull1</i>    | 1.03 ± 0.03 | 0.93 ± 0.02 |    | 1.05 ± 0.02  | 0.95 ± 0.03  | †  | 1.01 ± 0.02  | 0.99 ± 0.02  | *  | 1.07 ± 0.03  | 0.97 ± 0.02  |
| <i>cull2</i>    | 1.07 ± 0.03 | 0.93 ± 0.04 |    | 1.06 ± 0.06  | 0.90 ± 0.04  | †  | 0.96 ± 0.04† | 0.99 ± 0.04  | *  | 1.23 ± 0.09  | 1.13 ± 0.07  |
| <i>cull3</i>    | 1.05 ± 0.03 | 1.00 ± 0.03 | *† | 1.05 ± 0.03  | 0.90 ± 0.02† |    | 1.01 ± 0.02  | 0.96 ± 0.02  |    | 1.12 ± 0.03  | 1.01 ± 0.03  |
| <i>cull5</i>    | 0.99 ± 0.05 | 0.89 ± 0.06 |    | 0.97 ± 0.06  | 0.97 ± 0.04  | †  | 0.96 ± 0.04  | 1.13 ± 0.03† |    | 0.97 ± 0.06  | 0.99 ± 0.07  |
| <i>cowf1911</i> | 1.13 ± 0.02 | 0.97 ± 0.03 |    | 1.17 ± 0.03  | 0.89 ± 0.03  | *  | 1.03 ± 0.03  | 0.85 ± 0.04  | †  | 1.22 ± 0.05  | 0.92 ± 0.03  |
| <i>cowf1912</i> | 1.07 ± 0.01 | 0.87 ± 0.02 | †  | 1.04 ± 0.03  | 0.97 ± 0.01† | *† | 1.08 ± 0.02  | 0.98 ± 0.02† | †  | 1.03 ± 0.02  | 0.95 ± 0.03† |
| <i>cxcl1</i>    | 0.90 ± 0.11 | 1.08 ± 0.10 |    | 1.06 ± 0.10  | 0.97 ± 0.08  |    | 0.95 ± 0.06  | 1.12 ± 0.09  |    | 0.87 ± 0.07  | 1.07 ± 0.07  |
| <i>d123</i>     | 1.01 ± 0.01 | 0.98 ± 0.02 |    | 1.02 ± 0.01  | 0.99 ± 0.01  |    | 1.01 ± 0.01  | 0.97 ± 0.01  |    | 1.01 ± 0.01  | 0.99 ± 0.01  |
| <i>dcc</i>      | 1.00 ± 0.10 | 1.04 ± 0.11 |    | 1.16 ± 0.13  | 0.95 ± 0.07  |    | 1.20 ± 0.13  | 1.11 ± 0.10  |    | 0.90 ± 0.06  | 1.04 ± 0.08  |
| <i>ddit3</i>    | 0.99 ± 0.01 | 0.87 ± 0.02 | *  | 1.07 ± 0.02  | 0.98 ± 0.01  | *† | 1.10 ± 0.01† | 1.39 ± 0.03† | †  | 0.94 ± 0.02  | 0.96 ± 0.02† |
| <i>ddx16</i>    | 1.07 ± 0.04 | 1.07 ± 0.06 |    | 1.04 ± 0.03  | 0.99 ± 0.04  | *  | 1.03 ± 0.04  | 0.92 ± 0.05  |    | 1.05 ± 0.03  | 1.00 ± 0.04  |
| <i>dhcr24</i>   | 1.00 ± 0.02 | 0.97 ± 0.06 |    | 0.93 ± 0.05  | 1.00 ± 0.03  |    | 1.10 ± 0.05  | 1.01 ± 0.04  |    | 0.94 ± 0.05  | 0.98 ± 0.03  |
| <i>dlg5</i>     | 0.97 ± 0.02 | 0.90 ± 0.05 | †  | 0.95 ± 0.02  | 1.04 ± 0.02† | *  | 1.03 ± 0.05  | 1.09 ± 0.04  | †  | 0.90 ± 0.04  | 1.04 ± 0.04† |
| <i>dlg7</i>     | 1.19 ± 0.01 | 0.91 ± 0.02 | *  | 1.12 ± 0.02  | 0.88 ± 0.01  | *  | 1.10 ± 0.01  | 0.82 ± 0.01  | †  | 1.15 ± 0.02  | 0.96 ± 0.01† |
| <i>dlgh1</i>    | 1.03 ± 0.05 | 0.95 ± 0.05 | †  | 1.18 ± 0.04† | 0.84 ± 0.03  |    | 1.12 ± 0.05  | 0.99 ± 0.03  |    | 1.10 ± 0.08  | 0.94 ± 0.04  |
| <i>dst</i>      | 0.97 ± 0.02 | 0.97 ± 0.02 |    | 1.00 ± 0.02  | 0.98 ± 0.02  | †  | 0.95 ± 0.02  | 1.06 ± 0.02† | *  | 1.07 ± 0.03  | 1.08 ± 0.03  |
| <i>dtymk</i>    | 1.06 ± 0.01 | 0.99 ± 0.02 | *  | 1.03 ± 0.01  | 0.96 ± 0.01  | *  | 1.03 ± 0.01  | 0.96 ± 0.01  | *  | 1.05 ± 0.02  | 0.95 ± 0.01  |
| <i>dusp1</i>    | 0.76 ± 0.01 | 1.19 ± 0.10 | *† | 0.86 ± 0.03  | 1.72 ± 0.04† | *† | 0.90 ± 0.03† | 2.05 ± 0.04† | *† | 0.78 ± 0.03  | 1.52 ± 0.02† |
| <i>e2f1</i>     | 1.11 ± 0.03 | 0.99 ± 0.02 |    | 1.11 ± 0.02  | 1.00 ± 0.02  | †  | 1.17 ± 0.02  | 0.94 ± 0.02  | *  | 0.96 ± 0.02  | 0.90 ± 0.02  |
| <i>e2f5</i>     | 1.19 ± 0.03 | 0.85 ± 0.03 |    | 1.17 ± 0.04  | 0.84 ± 0.03  | †  | 1.17 ± 0.03  | 0.96 ± 0.02† |    | 1.15 ± 0.05  | 0.87 ± 0.04  |
| <i>e2f6</i>     | 1.08 ± 0.03 | 0.97 ± 0.04 |    | 1.04 ± 0.02  | 0.98 ± 0.03  |    | 1.04 ± 0.03  | 1.00 ± 0.03  |    | 1.07 ± 0.04  | 0.97 ± 0.01  |
| <i>egfr</i>     | 1.11 ± 0.01 | 1.05 ± 0.03 | *  | 1.02 ± 0.03  | 0.93 ± 0.01  | *† | 1.01 ± 0.02† | 0.84 ± 0.02† | *† | 1.12 ± 0.01  | 0.95 ± 0.02† |
| <i>EIF4g2</i>   | 1.04 ± 0.04 | 0.89 ± 0.06 |    | 1.07 ± 0.05  | 0.94 ± 0.04  |    | 1.03 ± 0.03  | 0.99 ± 0.05  |    | 1.12 ± 0.07  | 0.98 ± 0.04  |
| <i>elk1</i>     | 0.95 ± 0.03 | 1.08 ± 0.09 |    | 1.12 ± 0.12  | 1.07 ± 0.10  | †  | 1.05 ± 0.06  | 0.90 ± 0.07  | †  | 1.21 ± 0.09† | 0.97 ± 0.11  |
| <i>erall1</i>   | 1.04 ± 0.01 | 0.89 ± 0.04 |    | 1.05 ± 0.04  | 0.95 ± 0.03  | *† | 1.04 ± 0.03  | 1.02 ± 0.03† | †  | 1.00 ± 0.02  | 0.99 ± 0.03  |
| <i>erbb2</i>    | 0.99 ± 0.01 | 1.02 ± 0.02 |    | 0.97 ± 0.02  | 1.01 ± 0.02  |    | 0.99 ± 0.02  | 1.03 ± 0.02  |    | 0.97 ± 0.03  | 1.03 ± 0.01  |
| <i>erbb3</i>    | 1.21 ± 0.11 | 1.09 ± 0.09 | *  | 0.78 ± 0.10  | 0.95 ± 0.08  |    | 1.17 ± 0.07  | 0.99 ± 0.05  | *  | 0.82 ± 0.06  | 0.83 ± 0.08  |
| <i>ereg</i>     | 0.94 ± 0.10 | 1.10 ± 0.10 |    | 1.06 ± 0.15  | 0.98 ± 0.08  |    | 1.02 ± 0.10  | 1.13 ± 0.10  |    | 0.90 ± 0.07  | 1.06 ± 0.06  |
| <i>erf</i>      | 0.90 ± 0.09 | 1.12 ± 0.10 |    | 0.91 ± 0.05  | 0.98 ± 0.03  | †  | 1.18 ± 0.13  | 1.00 ± 0.07  |    | 1.09 ± 0.07  | 1.04 ± 0.11  |
| <i>espl1</i>    | 1.36 ± 0.01 | 0.91 ± 0.01 | *  | 1.22 ± 0.03  | 0.83 ± 0.01  | *† | 1.25 ± 0.01† | 0.76 ± 0.01† | *  | 1.27 ± 0.02  | 0.85 ± 0.01  |
| <i>ets1</i>     | 1.17 ± 0.11 | 1.03 ± 0.07 | *  | 0.92 ± 0.09  | 0.92 ± 0.06  |    | 1.06 ± 0.12  | 0.97 ± 0.06  |    | 0.96 ± 0.13  | 0.96 ± 0.06  |
| <i>ets2</i>     | 1.22 ± 0.09 | 0.97 ± 0.03 | *  | 0.97 ± 0.05  | 0.87 ± 0.03  |    | 1.07 ± 0.04  | 0.96 ± 0.06  |    | 1.18 ± 0.07  | 0.90 ± 0.08  |
| <i>fancd2</i>   | 1.24 ± 0.05 | 0.87 ± 0.04 |    | 1.17 ± 0.04  | 0.90 ± 0.02  |    | 1.27 ± 0.05  | 0.85 ± 0.03  |    | 1.09 ± 0.01  | 0.87 ± 0.03  |
| <i>fbxo2</i>    | 1.05 ± 0.03 | 1.02 ± 0.01 |    | 1.02 ± 0.02  | 1.02 ± 0.02  | *† | 1.04 ± 0.02  | 0.92 ± 0.01† | *  | 0.98 ± 0.03  | 0.95 ± 0.02  |
| <i>fgf1</i>     | 0.93 ± 0.08 | 1.33 ± 0.15 | *  | 0.82 ± 0.11  | 0.94 ± 0.09  | †  | 1.08 ± 0.15  | 0.92 ± 0.07† | *  | 0.72 ± 0.08  | 0.96 ± 0.06  |
| <i>fgf2</i>     | 0.95 ± 0.07 | 1.10 ± 0.09 | *  | 0.80 ± 0.05  | 1.02 ± 0.05  | *  | 0.77 ± 0.10  | 1.08 ± 0.14  | *  | 0.73 ± 0.06  | 0.99 ± 0.06  |
| <i>fgf3</i>     | 0.94 ± 0.14 | 0.94 ± 0.11 |    | 1.04 ± 0.12  | 0.92 ± 0.13  |    | 0.87 ± 0.16  | 0.96 ± 0.15  |    | 1.16 ± 0.17  | 0.99 ± 0.12  |
| <i>fgf4</i>     | 1.06 ± 0.16 | 0.98 ± 0.14 |    | 1.14 ± 0.13  | 0.87 ± 0.10  |    | 0.88 ± 0.13  | 1.11 ± 0.13  |    | 0.99 ± 0.15  | 0.92 ± 0.09  |
| <i>fgf5</i>     | 0.96 ± 0.08 | 1.06 ± 0.09 |    | 1.14 ± 0.12  | 0.94 ± 0.08  |    | 0.93 ± 0.06  | 1.08 ± 0.11  |    | 0.90 ± 0.06  | 0.92 ± 0.11  |
| <i>fgf7</i>     | 0.88 ± 0.10 | 1.06 ± 0.09 |    | 1.06 ± 0.11  | 0.95 ± 0.08  |    | 0.88 ± 0.07  | 1.17 ± 0.11  |    | 0.89 ± 0.07  | 1.05 ± 0.07  |
| <i>fgf9</i>     | 0.94 ± 0.09 | 1.06 ± 0.10 | †  | 1.20 ± 0.06† | 0.98 ± 0.07  | *  | 1.09 ± 0.12  | 1.18 ± 0.08  |    | 1.05 ± 0.07  | 1.04 ± 0.06  |
| <i>fgr</i>      | 1.26 ± 0.17 | 1.28 ± 0.15 |    | 0.98 ± 0.14  | 1.11 ± 0.13  |    | 0.90 ± 0.11  | 1.18 ± 0.21  | *  | 0.85 ± 0.10  | 0.95 ± 0.12  |
| <i>figf</i>     | 1.01 ± 0.11 | 1.06 ± 0.11 |    | 1.15 ± 0.11  | 0.85 ± 0.05  |    | 1.16 ± 0.12  | 1.05 ± 0.11  |    | 0.90 ± 0.12  | 0.87 ± 0.05  |
| <i>fos</i>      | 0.92 ± 0.08 | 1.07 ± 0.12 |    | 1.14 ± 0.14  | 0.93 ± 0.06  |    | 1.10 ± 0.14  | 1.06 ± 0.10  |    | 1.10 ± 0.15  | 1.02 ± 0.07  |
| <i>foxf1</i>    | 1.02 ± 0.10 | 1.05 ± 0.09 |    | 1.05 ± 0.13  | 0.98 ± 0.07  |    | 1.00 ± 0.08  | 1.08 ± 0.10  |    | 0.98 ± 0.08  | 1.03 ± 0.07  |
| <i>frap1</i>    | 1.06 ± 0.03 | 0.95 ± 0.05 |    | 1.02 ± 0.03  | 1.00 ± 0.02  |    | 1.10 ± 0.03  | 0.97 ± 0.04  |    | 0.96 ± 0.02  | 0.95 ± 0.04  |
| <i>fyn</i>      | 0.96 ± 0.01 | 1.06 ± 0.01 | †  | 0.90 ± 0.01† | 1.11 ± 0.01† | *† | 0.96 ± 0.01  | 1.11 ± 0.01† |    | 0.94 ± 0.02  | 1.06 ± 0.02  |
| <i>fzr1</i>     | 1.02 ± 0.01 | 0.90 ± 0.03 | †  | 0.99 ± 0.04  | 1.04 ± 0.03† | †  | 1.00 ± 0.04  | 1.06 ± 0.04† | †  | 0.99 ± 0.04  | 1.00 ± 0.03† |
| <i>glp2</i>     | 0.87 ± 0.01 | 1.06 ± 0.03 | *† | 0.95 ± 0.02  | 1.35 ± 0.04† | *† | 1.01 ± 0.02† | 1.65 ± 0.04† | *  | 0.77 ± 0.02  | 0.99 ± 0.02  |

Supplemental Table 1 (continued)

|                  |             |             |    |              |              |    |              |              |    |              |              |
|------------------|-------------|-------------|----|--------------|--------------|----|--------------|--------------|----|--------------|--------------|
| <i>gadd45a</i>   | 0.92 ± 0.01 | 1.12 ± 0.03 | *  | 0.98 ± 0.02  | 1.23 ± 0.02  | *† | 0.96 ± 0.03  | 1.57 ± 0.03† | *  | 0.83 ± 0.02  | 1.00 ± 0.03  |
| <i>gadd45b</i>   | 1.09 ± 0.03 | 0.96 ± 0.05 |    | 1.05 ± 0.04  | 0.92 ± 0.04  |    | 1.12 ± 0.03  | 0.98 ± 0.05  | *  | 1.00 ± 0.05  | 0.89 ± 0.03  |
| <i>gadd45g</i>   | 0.84 ± 0.01 | 1.11 ± 0.02 | *  | 0.95 ± 0.03  | 1.24 ± 0.01  | *† | 0.93 ± 0.01† | 1.38 ± 0.02† | *  | 0.80 ± 0.01  | 1.04 ± 0.01  |
| <i>gak</i>       | 1.01 ± 0.01 | 1.03 ± 0.04 |    | 1.00 ± 0.02  | 1.01 ± 0.02  |    | 1.01 ± 0.02  | 1.05 ± 0.01  | *  | 0.98 ± 0.01  | 0.97 ± 0.02  |
| <i>gfi1b</i>     | 1.02 ± 0.02 | 0.98 ± 0.03 |    | 1.03 ± 0.03  | 1.02 ± 0.02  | *  | 1.07 ± 0.03  | 1.03 ± 0.03  |    | 1.02 ± 0.02  | 0.99 ± 0.02  |
| <i>gml</i>       | 0.92 ± 0.14 | 1.04 ± 0.10 |    | 1.10 ± 0.11  | 0.88 ± 0.10  |    | 1.09 ± 0.16  | 1.09 ± 0.11  |    | 1.04 ± 0.12  | 0.98 ± 0.06  |
| <i>gmn</i>       | 1.25 ± 0.02 | 0.77 ± 0.02 |    | 1.22 ± 0.03  | 0.76 ± 0.02  | †  | 1.33 ± 0.04  | 0.74 ± 0.01  | †  | 1.21 ± 0.03  | 0.83 ± 0.02  |
| <i>gpr132</i>    | 0.96 ± 0.06 | 1.04 ± 0.06 |    | 0.98 ± 0.07  | 1.06 ± 0.09  |    | 1.10 ± 0.07  | 1.01 ± 0.08  |    | 1.05 ± 0.09  | 0.89 ± 0.06  |
| <i>gpr21</i>     | 1.00 ± 0.07 | 1.00 ± 0.10 |    | 0.95 ± 0.06  | 0.97 ± 0.07  |    | 0.95 ± 0.08  | 1.06 ± 0.04  |    | 1.01 ± 0.08  | 0.95 ± 0.07  |
| <i>gps2</i>      | 0.93 ± 0.03 | 1.08 ± 0.03 |    | 0.90 ± 0.02  | 1.09 ± 0.02  |    | 0.96 ± 0.03  | 1.11 ± 0.02  |    | 0.88 ± 0.02  | 1.05 ± 0.04  |
| <i>gsk3b</i>     | 0.96 ± 0.03 | 1.04 ± 0.06 | *  | 0.91 ± 0.04  | 0.91 ± 0.03  |    | 0.96 ± 0.03  | 1.00 ± 0.03  | *  | 1.12 ± 0.05  | 1.15 ± 0.03  |
| <i>gspt1</i>     | 1.04 ± 0.02 | 0.96 ± 0.03 |    | 1.05 ± 0.02  | 0.93 ± 0.03  |    | 1.00 ± 0.03  | 0.97 ± 0.02  |    | 1.07 ± 0.02  | 0.98 ± 0.03  |
| <i>hcfc2</i>     | 1.08 ± 0.03 | 0.90 ± 0.03 |    | 1.12 ± 0.04  | 0.96 ± 0.04  |    | 1.13 ± 0.04  | 0.92 ± 0.04  | †  | 0.99 ± 0.02† | 0.95 ± 0.04  |
| <i>hdac3</i>     | 1.04 ± 0.01 | 0.97 ± 0.01 |    | 1.03 ± 0.01  | 0.98 ± 0.01  |    | 1.07 ± 0.01  | 0.98 ± 0.01  | *  | 1.00 ± 0.02  | 0.91 ± 0.01  |
| <i>hdac4</i>     | 1.04 ± 0.07 | 1.04 ± 0.03 |    | 0.97 ± 0.03  | 0.97 ± 0.06  |    | 1.01 ± 0.06  | 1.03 ± 0.08  |    | 1.07 ± 0.07  | 0.96 ± 0.07  |
| <i>hdac7</i>     | 1.03 ± 0.02 | 1.02 ± 0.01 |    | 1.00 ± 0.02  | 1.01 ± 0.02  |    | 1.04 ± 0.03  | 1.00 ± 0.01  | *  | 0.96 ± 0.02  | 0.94 ± 0.02  |
| <i>hdac7a</i>    | 1.07 ± 0.04 | 0.99 ± 0.04 |    | 1.08 ± 0.05  | 0.98 ± 0.05  |    | 1.09 ± 0.08  | 0.98 ± 0.06  | *  | 0.95 ± 0.04  | 0.93 ± 0.05  |
| <i>heca</i>      | 0.90 ± 0.05 | 1.03 ± 0.13 |    | 0.92 ± 0.08  | 0.91 ± 0.06  |    | 0.95 ± 0.05  | 1.16 ± 0.11  |    | 1.05 ± 0.04  | 1.01 ± 0.08  |
| <i>herc2</i>     | 1.00 ± 0.01 | 1.02 ± 0.02 |    | 0.98 ± 0.01  | 0.99 ± 0.01  |    | 0.99 ± 0.01  | 1.01 ± 0.01  |    | 0.98 ± 0.02  | 0.99 ± 0.01  |
| <i>hipk2</i>     | 1.12 ± 0.04 | 0.89 ± 0.05 |    | 1.08 ± 0.04  | 0.90 ± 0.03  |    | 1.05 ± 0.04  | 0.95 ± 0.03  |    | 1.08 ± 0.06  | 0.96 ± 0.03  |
| <i>hirip5</i>    | 1.10 ± 0.09 | 1.00 ± 0.11 |    | 1.06 ± 0.14  | 1.21 ± 0.19  | *  | 1.67 ± 0.19  | 1.07 ± 0.06  |    | 1.27 ± 0.22  | 1.12 ± 0.19  |
| <i>hrasls3</i>   | 1.00 ± 0.09 | 1.11 ± 0.08 |    | 1.05 ± 0.10  | 1.07 ± 0.06  |    | 0.92 ± 0.06  | 1.10 ± 0.10  |    | 0.90 ± 0.07  | 1.08 ± 0.06  |
| <i>hspa8</i>     | 1.01 ± 0.02 | 1.01 ± 0.02 |    | 0.99 ± 0.01  | 1.02 ± 0.01  |    | 0.98 ± 0.01  | 1.00 ± 0.01  |    | 0.99 ± 0.01  | 1.02 ± 0.02  |
| <i>id2</i>       | 0.97 ± 0.01 | 0.98 ± 0.02 | *  | 1.04 ± 0.01  | 1.03 ± 0.02  | *  | 0.98 ± 0.01  | 1.02 ± 0.01  |    | 0.99 ± 0.02  | 1.01 ± 0.01  |
| <i>idh3b</i>     | 1.03 ± 0.01 | 0.91 ± 0.02 | *† | 1.02 ± 0.01  | 0.98 ± 0.01† | *† | 1.05 ± 0.01  | 1.01 ± 0.01† | *  | 0.98 ± 0.02  | 0.91 ± 0.01  |
| <i>ifitm1</i>    | 0.85 ± 0.02 | 1.10 ± 0.02 | *† | 0.85 ± 0.02  | 1.34 ± 0.03† | *† | 0.87 ± 0.01  | 1.27 ± 0.02† | †  | 0.98 ± 0.02† | 0.99 ± 0.01† |
| <i>igf2</i>      | 1.08 ± 0.01 | 0.85 ± 0.04 | *  | 1.12 ± 0.04  | 1.02 ± 0.05  |    | 1.06 ± 0.02  | 0.94 ± 0.04  | †  | 0.93 ± 0.04† | 0.90 ± 0.02  |
| <i>il18</i>      | 1.04 ± 0.02 | 1.12 ± 0.04 |    | 1.04 ± 0.02  | 1.04 ± 0.01  | *† | 1.04 ± 0.02  | 0.93 ± 0.01† | *† | 0.95 ± 0.01  | 0.86 ± 0.02† |
| <i>il1a</i>      | 0.88 ± 0.10 | 1.13 ± 0.09 |    | 1.02 ± 0.12  | 1.00 ± 0.08  |    | 1.00 ± 0.10  | 1.12 ± 0.10  |    | 0.95 ± 0.08  | 1.06 ± 0.07  |
| <i>il1b</i>      | 0.95 ± 0.08 | 1.12 ± 0.10 |    | 1.05 ± 0.12  | 1.15 ± 0.13  |    | 1.37 ± 0.23  | 0.98 ± 0.12  |    | 1.12 ± 0.12  | 1.00 ± 0.07  |
| <i>ilkap</i>     | 1.10 ± 0.02 | 0.98 ± 0.03 |    | 1.06 ± 0.03  | 0.98 ± 0.02  |    | 1.10 ± 0.03  | 0.92 ± 0.02  | *  | 1.00 ± 0.04  | 0.90 ± 0.02  |
| <i>inha</i>      | 0.94 ± 0.02 | 1.06 ± 0.02 |    | 0.95 ± 0.02  | 1.01 ± 0.01  |    | 0.97 ± 0.02  | 1.04 ± 0.02  |    | 0.98 ± 0.01  | 1.04 ± 0.02  |
| <i>itgb1</i>     | 0.93 ± 0.06 | 1.01 ± 0.12 |    | 0.96 ± 0.05  | 1.05 ± 0.06  |    | 0.92 ± 0.06  | 1.24 ± 0.11  |    | 1.03 ± 0.06  | 1.18 ± 0.08  |
| <i>jaq2</i>      | 0.98 ± 0.04 | 1.11 ± 0.09 |    | 0.92 ± 0.04  | 0.97 ± 0.04  |    | 0.93 ± 0.04  | 1.07 ± 0.06  |    | 1.03 ± 0.03  | 1.13 ± 0.03  |
| <i>jun</i>       | 0.73 ± 0.01 | 1.27 ± 0.03 | *  | 0.76 ± 0.01  | 1.40 ± 0.02  | *† | 0.78 ± 0.01  | 1.51 ± 0.02† |    | 0.77 ± 0.01  | 1.27 ± 0.02  |
| <i>junb</i>      | 1.07 ± 0.02 | 0.92 ± 0.01 |    | 1.08 ± 0.03  | 0.96 ± 0.02  | *  | 1.10 ± 0.03  | 0.97 ± 0.02  |    | 1.05 ± 0.04  | 0.96 ± 0.03  |
| <i>jund</i>      | 0.84 ± 0.02 | 1.19 ± 0.03 | *  | 0.85 ± 0.02  | 1.31 ± 0.03  | *  | 0.93 ± 0.03  | 1.35 ± 0.02  | *  | 0.80 ± 0.04  | 1.09 ± 0.02  |
| <i>katna1</i>    | 1.00 ± 0.01 | 0.95 ± 0.01 | *  | 1.04 ± 0.01  | 0.96 ± 0.01  | *  | 1.02 ± 0.01  | 0.99 ± 0.01  | *  | 1.05 ± 0.01  | 0.99 ± 0.02  |
| <i>knc2</i>      | 1.19 ± 0.03 | 0.86 ± 0.02 | *  | 1.11 ± 0.02  | 0.82 ± 0.01  | *  | 1.09 ± 0.01  | 0.78 ± 0.02  |    | 1.16 ± 0.02  | 0.86 ± 0.01  |
| <i>kras2</i>     | 1.08 ± 0.03 | 1.01 ± 0.03 | *  | 1.05 ± 0.03  | 0.92 ± 0.03  |    | 1.07 ± 0.04  | 0.95 ± 0.04  | *  | 1.02 ± 0.05  | 0.92 ± 0.03  |
| <i>lats2</i>     | 1.12 ± 0.08 | 0.90 ± 0.09 | †  | 1.43 ± 0.11† | 0.74 ± 0.07  |    | 1.06 ± 0.12  | 0.76 ± 0.10  |    | 1.35 ± 0.14  | 1.01 ± 0.11  |
| <i>lek1</i>      | 1.29 ± 0.02 | 0.83 ± 0.02 | *† | 1.07 ± 0.04† | 0.83 ± 0.03  | *† | 1.09 ± 0.04† | 0.83 ± 0.02  | †  | 1.13 ± 0.05† | 0.99 ± 0.05† |
| <i>lgil</i>      | 0.87 ± 0.08 | 0.94 ± 0.08 | *  | 1.24 ± 0.12  | 0.97 ± 0.11  | *  | 1.37 ± 0.26  | 1.16 ± 0.13  |    | 0.85 ± 0.06  | 1.04 ± 0.10  |
| <i>loc140610</i> | 0.85 ± 0.02 | 1.20 ± 0.04 | *  | 0.93 ± 0.02  | 1.41 ± 0.03  | *† | 0.89 ± 0.02  | 1.60 ± 0.03† |    | 0.81 ± 0.03  | 1.22 ± 0.02  |
| <i>loc288165</i> | 0.99 ± 0.02 | 1.01 ± 0.03 |    | 1.01 ± 0.01  | 1.05 ± 0.02  |    | 0.99 ± 0.02  | 0.99 ± 0.01  |    | 0.99 ± 0.02  | 1.01 ± 0.02  |
| <i>loc288698</i> | 1.30 ± 0.02 | 0.89 ± 0.02 |    | 1.21 ± 0.03  | 0.88 ± 0.02  | *  | 1.17 ± 0.04  | 0.84 ± 0.02  | *† | 1.11 ± 0.02† | 0.84 ± 0.01  |
| <i>loh11cr2a</i> | 0.93 ± 0.04 | 0.88 ± 0.06 | *  | 1.02 ± 0.05  | 1.12 ± 0.03  | *† | 0.97 ± 0.03  | 1.12 ± 0.04† | †  | 0.82 ± 0.03† | 1.10 ± 0.04† |
| <i>lyn</i>       | 1.00 ± 0.02 | 1.07 ± 0.02 |    | 0.99 ± 0.03  | 1.01 ± 0.02  |    | 1.02 ± 0.01  | 1.02 ± 0.02  | *† | 0.85 ± 0.03† | 0.73 ± 0.02† |
| <i>maf</i>       | 0.99 ± 0.13 | 1.09 ± 0.05 |    | 1.00 ± 0.15  | 1.03 ± 0.09  |    | 1.13 ± 0.21  | 1.01 ± 0.12  |    | 1.09 ± 0.12  | 0.86 ± 0.11  |
| <i>mafj</i>      | 0.87 ± 0.04 | 0.93 ± 0.04 | *  | 1.00 ± 0.04  | 1.14 ± 0.03  | *  | 1.04 ± 0.03  | 1.18 ± 0.04  | *  | 0.94 ± 0.01  | 1.06 ± 0.05  |
| <i>map2k6</i>    | 0.97 ± 0.09 | 1.06 ± 0.09 |    | 1.11 ± 0.10  | 0.99 ± 0.08  |    | 0.90 ± 0.06  | 1.10 ± 0.10  |    | 0.87 ± 0.06  | 1.05 ± 0.07  |
| <i>map3k8</i>    | 1.01 ± 0.03 | 1.13 ± 0.09 |    | 0.96 ± 0.04  | 1.04 ± 0.08  |    | 1.03 ± 0.05  | 1.14 ± 0.12  | *  | 0.91 ± 0.07  | 0.97 ± 0.05  |
| <i>mapk1</i>     | 1.04 ± 0.03 | 0.98 ± 0.02 |    | 1.02 ± 0.03  | 0.96 ± 0.02  |    | 1.00 ± 0.02  | 0.96 ± 0.02  |    | 1.02 ± 0.04  | 1.03 ± 0.02  |
| <i>mapk12</i>    | 1.05 ± 0.03 | 0.94 ± 0.02 | *  | 1.07 ± 0.05  | 1.03 ± 0.03  | *  | 1.09 ± 0.03  | 1.04 ± 0.03  | *  | 0.98 ± 0.06  | 0.88 ± 0.04  |
| <i>mapk13</i>    | 1.08 ± 0.06 | 0.89 ± 0.07 |    | 0.99 ± 0.07  | 1.03 ± 0.06  | †  | 1.06 ± 0.05  | 1.08 ± 0.05† | *  | 0.81 ± 0.07  | 0.73 ± 0.04  |
| <i>mapk3</i>     | 0.93 ± 0.02 | 0.98 ± 0.04 | *  | 0.96 ± 0.03  | 1.09 ± 0.05  | †  | 0.89 ± 0.02  | 1.08 ± 0.04  | *  | 0.99 ± 0.05  | 1.12 ± 0.05  |
| <i>mapk4</i>     | 1.02 ± 0.07 | 0.82 ± 0.09 |    | 1.09 ± 0.09  | 0.92 ± 0.08  |    | 1.09 ± 0.09  | 0.91 ± 0.06  |    | 1.01 ± 0.05  | 1.06 ± 0.10  |
| <i>mapk6</i>     | 0.99 ± 0.02 | 1.02 ± 0.04 |    | 1.00 ± 0.05  | 1.00 ± 0.02  |    | 0.96 ± 0.03  | 0.96 ± 0.03  |    | 1.00 ± 0.05  | 1.08 ± 0.03  |

Supplemental Table 1 (continued)

|                 |             |             |   |              |              |    |              |              |    |              |              |
|-----------------|-------------|-------------|---|--------------|--------------|----|--------------|--------------|----|--------------|--------------|
| <i>mapre1</i>   | 1.10 ± 0.02 | 0.89 ± 0.06 |   | 1.08 ± 0.02  | 0.99 ± 0.02  |    | 1.08 ± 0.02  | 0.89 ± 0.02  | †  | 1.02 ± 0.02  | 0.97 ± 0.02  |
| <i>mas1</i>     | 0.96 ± 0.10 | 0.99 ± 0.09 |   | 0.94 ± 0.07  | 0.91 ± 0.05  |    | 0.84 ± 0.15  | 1.00 ± 0.07  |    | 0.91 ± 0.07  | 1.03 ± 0.07  |
| <i>mcm2</i>     | 1.23 ± 0.04 | 0.84 ± 0.03 |   | 1.20 ± 0.04  | 0.88 ± 0.02  |    | 1.27 ± 0.03  | 0.85 ± 0.03  |    | 1.11 ± 0.05  | 0.84 ± 0.04  |
| <i>mcm5</i>     | 1.27 ± 0.05 | 0.83 ± 0.03 |   | 1.20 ± 0.04  | 0.86 ± 0.02  |    | 1.26 ± 0.05  | 0.80 ± 0.03  | †  | 1.13 ± 0.03† | 0.86 ± 0.03  |
| <i>mcnd6</i>    | 1.31 ± 0.03 | 0.85 ± 0.03 | † | 1.20 ± 0.02† | 0.86 ± 0.02  |    | 1.29 ± 0.04  | 0.82 ± 0.02  | †  | 1.15 ± 0.04† | 0.90 ± 0.03  |
| <i>mcrs1</i>    | 1.04 ± 0.02 | 0.92 ± 0.03 | † | 1.01 ± 0.02  | 0.99 ± 0.01  | †  | 1.03 ± 0.02  | 1.01 ± 0.02† |    | 1.00 ± 0.03  | 0.92 ± 0.03  |
| <i>mdc1</i>     | 1.19 ± 0.03 | 0.89 ± 0.05 | * | 1.12 ± 0.03  | 0.80 ± 0.02  | *  | 1.11 ± 0.03  | 0.78 ± 0.03  | *  | 1.16 ± 0.03  | 0.80 ± 0.01  |
| <i>mdk</i>      | 0.97 ± 0.03 | 1.00 ± 0.03 |   | 0.94 ± 0.03  | 1.00 ± 0.03  | *  | 1.04 ± 0.03  | 1.03 ± 0.03  | †  | 1.04 ± 0.03  | 0.95 ± 0.03  |
| <i>mdm2</i>     | 0.83 ± 0.01 | 1.08 ± 0.01 | * | 0.90 ± 0.03  | 1.23 ± 0.03  | *  | 0.86 ± 0.02  | 1.18 ± 0.02  | *  | 0.92 ± 0.01  | 1.27 ± 0.03  |
| <i>mect1</i>    | 1.05 ± 0.05 | 1.07 ± 0.10 |   | 0.98 ± 0.04  | 0.97 ± 0.07  |    | 1.03 ± 0.03  | 1.08 ± 0.07  |    | 1.05 ± 0.06  | 0.95 ± 0.06  |
| <i>men1</i>     | 1.00 ± 0.02 | 1.05 ± 0.03 |   | 0.95 ± 0.02  | 1.04 ± 0.02  | †  | 1.01 ± 0.02  | 0.97 ± 0.02  | *  | 0.95 ± 0.02  | 0.98 ± 0.03  |
| <i>merlk</i>    | 0.99 ± 0.06 | 1.06 ± 0.10 |   | 1.15 ± 0.10  | 0.92 ± 0.07  |    | 1.08 ± 0.10  | 1.11 ± 0.07  |    | 0.92 ± 0.04  | 1.08 ± 0.06  |
| <i>met</i>      | 0.80 ± 0.10 | 1.08 ± 0.10 | † | 1.10 ± 0.09  | 0.94 ± 0.09  |    | 0.97 ± 0.06  | 1.11 ± 0.10  |    | 0.90 ± 0.07  | 1.05 ± 0.07  |
| <i>mid1</i>     | 0.97 ± 0.09 | 1.08 ± 0.10 |   | 1.10 ± 0.12  | 1.01 ± 0.07  |    | 1.05 ± 0.11  | 1.12 ± 0.10  |    | 0.98 ± 0.08  | 1.02 ± 0.07  |
| <i>mki67</i>    | 1.38 ± 0.06 | 0.83 ± 0.05 | * | 1.26 ± 0.04  | 0.75 ± 0.03  | *  | 1.22 ± 0.05  | 0.72 ± 0.04  |    | 1.33 ± 0.05  | 0.88 ± 0.03  |
| <i>mnat1</i>    | 1.01 ± 0.01 | 1.00 ± 0.03 |   | 1.04 ± 0.01  | 1.02 ± 0.02  |    | 1.01 ± 0.02  | 0.94 ± 0.01  |    | 1.00 ± 0.02  | 1.00 ± 0.02  |
| <i>mnt</i>      | 1.02 ± 0.04 | 0.97 ± 0.04 |   | 0.98 ± 0.03  | 1.03 ± 0.02  |    | 1.02 ± 0.01  | 1.06 ± 0.04  |    | 0.97 ± 0.03  | 0.99 ± 0.03  |
| <i>mos</i>      | 0.97 ± 0.09 | 1.12 ± 0.07 |   | 0.97 ± 0.11  | 0.93 ± 0.08  |    | 1.08 ± 0.11  | 1.17 ± 0.08  |    | 1.08 ± 0.13  | 1.00 ± 0.08  |
| <i>mphosph1</i> | 1.21 ± 0.04 | 0.92 ± 0.03 | * | 1.08 ± 0.06  | 0.85 ± 0.02  | *  | 1.12 ± 0.03  | 0.83 ± 0.02  |    | 1.25 ± 0.02  | 0.93 ± 0.03  |
| <i>mphosph6</i> | 1.07 ± 0.02 | 0.91 ± 0.03 |   | 1.08 ± 0.03  | 0.88 ± 0.03  |    | 1.12 ± 0.02  | 0.88 ± 0.02  |    | 1.06 ± 0.03  | 0.96 ± 0.01  |
| <i>mre11a</i>   | 1.26 ± 0.04 | 0.85 ± 0.03 |   | 1.31 ± 0.05  | 0.82 ± 0.02  |    | 1.28 ± 0.05  | 0.79 ± 0.04  |    | 1.24 ± 0.03  | 0.92 ± 0.03  |
| <i>msh2</i>     | 1.19 ± 0.01 | 0.91 ± 0.01 | * | 1.12 ± 0.01  | 0.87 ± 0.02  | *  | 1.15 ± 0.03  | 0.87 ± 0.02  |    | 1.15 ± 0.02  | 0.91 ± 0.02  |
| <i>mybl2</i>    | 1.19 ± 0.03 | 0.84 ± 0.02 |   | 1.15 ± 0.03  | 0.89 ± 0.02  |    | 1.21 ± 0.03  | 0.82 ± 0.02  | †  | 1.12 ± 0.04  | 0.90 ± 0.03  |
| <i>myc</i>      | 0.97 ± 0.03 | 0.55 ± 0.01 | * | 1.23 ± 0.04  | 0.70 ± 0.02  | *† | 1.17 ± 0.05† | 1.28 ± 0.05† | *† | 1.13 ± 0.04† | 0.73 ± 0.02† |
| <i>mycl1</i>    | 0.84 ± 0.08 | 0.87 ± 0.09 |   | 0.91 ± 0.10  | 0.83 ± 0.04  |    | 0.89 ± 0.10  | 1.02 ± 0.09  | *  | 1.25 ± 0.11  | 1.23 ± 0.14  |
| <i>mycn</i>     | 0.87 ± 0.05 | 1.15 ± 0.05 | † | 1.05 ± 0.07† | 0.86 ± 0.06† | †  | 1.02 ± 0.04† | 0.98 ± 0.05† | †  | 1.11 ± 0.05† | 0.91 ± 0.03† |
| <i>mycs</i>     | 1.19 ± 0.13 | 1.02 ± 0.06 |   | 1.00 ± 0.14  | 0.98 ± 0.08  |    | 1.05 ± 0.06  | 1.05 ± 0.13  | *  | 1.12 ± 0.11  | 0.77 ± 0.08  |
| <i>nbl1</i>     | 0.81 ± 0.05 | 1.18 ± 0.04 |   | 0.84 ± 0.04  | 1.29 ± 0.04  |    | 0.78 ± 0.03  | 1.11 ± 0.04  |    | 0.81 ± 0.04  | 1.15 ± 0.05  |
| <i>nbn</i>      | 1.08 ± 0.01 | 0.91 ± 0.03 |   | 1.12 ± 0.02  | 0.88 ± 0.01  |    | 1.11 ± 0.02  | 0.91 ± 0.02  |    | 1.09 ± 0.04  | 0.84 ± 0.01  |
| <i>ndn</i>      | 1.32 ± 0.12 | 1.09 ± 0.11 | * | 0.77 ± 0.07  | 0.88 ± 0.08  | *  | 0.87 ± 0.09  | 0.95 ± 0.08  |    | 1.25 ± 0.12  | 1.11 ± 0.11  |
| <i>nedd4a</i>   | 1.04 ± 0.05 | 0.92 ± 0.04 |   | 1.03 ± 0.05  | 0.94 ± 0.04  |    | 0.98 ± 0.05  | 0.98 ± 0.04  |    | 1.08 ± 0.04  | 0.96 ± 0.04  |
| <i>nedd8</i>    | 0.94 ± 0.01 | 1.05 ± 0.02 |   | 0.96 ± 0.01  | 1.05 ± 0.02  | †  | 0.98 ± 0.01  | 1.02 ± 0.01  |    | 0.95 ± 0.02  | 1.06 ± 0.02  |
| <i>nek2</i>     | 1.25 ± 0.02 | 0.84 ± 0.05 | † | 1.17 ± 0.03  | 0.90 ± 0.02  |    | 1.18 ± 0.04  | 0.85 ± 0.02  | †  | 1.08 ± 0.05† | 0.92 ± 0.03  |
| <i>nek3</i>     | 1.17 ± 0.06 | 0.76 ± 0.07 | † | 1.03 ± 0.06  | 1.07 ± 0.06† | †  | 0.94 ± 0.06† | 1.29 ± 0.04† | †  | 0.87 ± 0.06† | 1.38 ± 0.13† |
| <i>nf2</i>      | 0.87 ± 0.04 | 1.09 ± 0.06 | * | 0.93 ± 0.05  | 1.19 ± 0.08  |    | 0.92 ± 0.04  | 1.03 ± 0.04  | *  | 0.92 ± 0.04  | 1.24 ± 0.08  |
| <i>nfyc</i>     | 1.14 ± 0.04 | 0.99 ± 0.04 | * | 1.05 ± 0.04  | 0.88 ± 0.03  | *  | 1.09 ± 0.03  | 0.88 ± 0.03  | *  | 1.00 ± 0.06  | 0.92 ± 0.04  |
| <i>nol1</i>     | 0.99 ± 0.02 | 1.02 ± 0.01 | † | 1.03 ± 0.02  | 0.97 ± 0.02  | †  | 1.03 ± 0.02  | 0.99 ± 0.01  |    | 0.98 ± 0.01  | 0.99 ± 0.02  |
| <i>notch2</i>   | 0.90 ± 0.07 | 0.89 ± 0.07 |   | 1.05 ± 0.14  | 0.91 ± 0.06  | *  | 1.18 ± 0.16  | 1.01 ± 0.06  |    | 1.15 ± 0.13  | 0.84 ± 0.12  |
| <i>npm1</i>     | 1.08 ± 0.01 | 0.95 ± 0.03 | * | 1.06 ± 0.01  | 0.89 ± 0.01  | *  | 1.05 ± 0.02  | 0.90 ± 0.02  |    | 1.08 ± 0.03  | 0.94 ± 0.01  |
| <i>nr2f6</i>    | 1.07 ± 0.02 | 0.96 ± 0.02 |   | 1.06 ± 0.02  | 0.96 ± 0.02  |    | 1.12 ± 0.02  | 0.95 ± 0.02  | *  | 1.03 ± 0.02  | 0.90 ± 0.02  |
| <i>nras</i>     | 1.02 ± 0.03 | 0.96 ± 0.03 |   | 1.03 ± 0.03  | 1.01 ± 0.02  |    | 1.00 ± 0.02  | 1.01 ± 0.02  |    | 0.96 ± 0.04  | 0.98 ± 0.03  |
| <i>nucks</i>    | 1.07 ± 0.02 | 0.91 ± 0.07 |   | 1.04 ± 0.02  | 0.90 ± 0.02  |    | 1.01 ± 0.02  | 0.87 ± 0.04  | *  | 1.15 ± 0.02  | 0.96 ± 0.02  |
| <i>nudc</i>     | 1.01 ± 0.02 | 0.99 ± 0.03 | † | 0.99 ± 0.02  | 1.04 ± 0.01  |    | 1.02 ± 0.01  | 0.99 ± 0.01  |    | 0.95 ± 0.02  | 1.00 ± 0.02  |
| <i>olr251</i>   | 1.04 ± 0.08 | 1.07 ± 0.10 |   | 1.12 ± 0.11  | 0.98 ± 0.08  |    | 1.01 ± 0.10  | 1.01 ± 0.14  |    | 1.13 ± 0.14  | 1.01 ± 0.09  |
| <i>pal31</i>    | 1.11 ± 0.05 | 0.91 ± 0.06 |   | 1.06 ± 0.06  | 0.87 ± 0.04  |    | 1.00 ± 0.06  | 0.96 ± 0.04  |    | 1.14 ± 0.05  | 0.95 ± 0.04  |
| <i>par-6a</i>   | 0.98 ± 0.01 | 1.13 ± 0.02 | * | 0.97 ± 0.01  | 1.08 ± 0.01  | *† | 0.98 ± 0.01  | 1.01 ± 0.01† | *  | 0.92 ± 0.02  | 1.01 ± 0.01  |
| <i>par3</i>     | 1.02 ± 0.03 | 1.04 ± 0.03 | * | 1.00 ± 0.02  | 0.95 ± 0.02  |    | 0.96 ± 0.02  | 1.02 ± 0.03  | †  | 1.07 ± 0.02  | 0.97 ± 0.01  |
| <i>park2</i>    | 1.12 ± 0.08 | 0.92 ± 0.05 |   | 1.14 ± 0.11  | 1.09 ± 0.07  |    | 1.15 ± 0.06  | 1.05 ± 0.07  |    | 0.97 ± 0.04  | 0.87 ± 0.10  |
| <i>pbefl</i>    | 0.94 ± 0.03 | 1.01 ± 0.02 |   | 0.95 ± 0.01  | 1.03 ± 0.02  | *  | 0.99 ± 0.02  | 1.12 ± 0.02  |    | 0.95 ± 0.02  | 1.08 ± 0.04  |
| <i>pcaf</i>     | 1.05 ± 0.02 | 0.94 ± 0.04 |   | 1.09 ± 0.03  | 0.98 ± 0.03  |    | 1.07 ± 0.03  | 0.95 ± 0.03  | *  | 0.97 ± 0.01  | 0.89 ± 0.02  |
| <i>pcml</i>     | 1.09 ± 0.01 | 0.95 ± 0.02 | * | 1.03 ± 0.03  | 0.92 ± 0.01  |    | 1.06 ± 0.02  | 0.96 ± 0.01  |    | 1.06 ± 0.02  | 0.95 ± 0.02  |
| <i>pdgfa</i>    | 0.90 ± 0.01 | 1.06 ± 0.02 |   | 0.93 ± 0.01  | 1.08 ± 0.02  | *  | 0.95 ± 0.02  | 1.11 ± 0.02  |    | 0.91 ± 0.02  | 1.07 ± 0.03  |
| <i>pdgfb</i>    | 0.91 ± 0.08 | 1.02 ± 0.11 |   | 1.10 ± 0.13  | 0.88 ± 0.12  |    | 1.03 ± 0.10  | 0.87 ± 0.14  |    | 0.92 ± 0.11  | 0.94 ± 0.08  |
| <i>pdgfc</i>    | 0.93 ± 0.09 | 1.10 ± 0.10 |   | 1.08 ± 0.10  | 0.99 ± 0.08  |    | 0.93 ± 0.06  | 1.14 ± 0.10  |    | 0.90 ± 0.07  | 1.07 ± 0.07  |
| <i>pelo</i>     | 1.05 ± 0.02 | 0.97 ± 0.02 |   | 1.04 ± 0.02  | 0.96 ± 0.01  |    | 1.09 ± 0.02  | 0.94 ± 0.01  | *  | 1.01 ± 0.02  | 0.89 ± 0.03  |
| <i>pfdn1</i>    | 0.98 ± 0.01 | 1.01 ± 0.02 |   | 0.99 ± 0.01  | 1.02 ± 0.01  |    | 1.01 ± 0.01  | 1.01 ± 0.02  |    | 0.99 ± 0.02  | 1.03 ± 0.01  |
| <i>pgf</i>      | 1.09 ± 0.03 | 0.95 ± 0.03 | * | 0.91 ± 0.02  | 0.76 ± 0.01  | *† | 1.03 ± 0.02  | 0.73 ± 0.01† | *  | 1.32 ± 0.03  | 1.29 ± 0.04  |
| <i>pglyrp1</i>  | 1.03 ± 0.06 | 1.06 ± 0.05 |   | 0.99 ± 0.03  | 1.02 ± 0.04  |    | 0.95 ± 0.08  | 0.99 ± 0.05  |    | 0.95 ± 0.03  | 1.01 ± 0.06  |

Supplemental Table 1 (continued)

|                   |             |             |    |              |              |    |              |              |    |              |              |
|-------------------|-------------|-------------|----|--------------|--------------|----|--------------|--------------|----|--------------|--------------|
| <i>pkcbpb15</i>   | 0.99 ± 0.03 | 0.99 ± 0.03 | †  | 0.94 ± 0.02  | 1.05 ± 0.02  |    | 1.01 ± 0.02  | 1.02 ± 0.02  |    | 0.93 ± 0.02  | 0.98 ± 0.03  |
| <i>pkd1</i>       | 1.06 ± 0.02 | 0.98 ± 0.02 | †  | 0.98 ± 0.03  | 1.01 ± 0.02  |    | 1.04 ± 0.02  | 0.98 ± 0.01  |    | 1.00 ± 0.02  | 0.99 ± 0.03  |
| <i>plagl1</i>     | 1.07 ± 0.09 | 1.08 ± 0.09 |    | 1.05 ± 0.10  | 1.03 ± 0.09  |    | 0.91 ± 0.06  | 1.12 ± 0.09  | *  | 0.81 ± 0.07  | 1.04 ± 0.07  |
| <i>plcb1</i>      | 1.31 ± 0.12 | 1.02 ± 0.09 | *  | 1.12 ± 0.11  | 0.91 ± 0.07  | †  | 0.88 ± 0.05† | 1.08 ± 0.10  | †  | 0.87 ± 0.07† | 1.06 ± 0.09  |
| <i>plk1</i>       | 1.30 ± 0.02 | 0.85 ± 0.01 | *  | 1.17 ± 0.01  | 0.78 ± 0.01  | *† | 1.16 ± 0.01† | 0.71 ± 0.01† | *  | 1.20 ± 0.01  | 0.81 ± 0.01  |
| <i>plk2</i>       | 0.80 ± 0.03 | 1.13 ± 0.08 | *  | 0.90 ± 0.02  | 1.25 ± 0.03  | *  | 0.85 ± 0.03  | 1.46 ± 0.08  | *  | 0.94 ± 0.02  | 1.42 ± 0.04  |
| <i>plk3</i>       | 1.03 ± 0.03 | 0.91 ± 0.03 |    | 0.97 ± 0.03  | 0.91 ± 0.02  |    | 1.07 ± 0.02  | 0.88 ± 0.03  | *† | 1.43 ± 0.03† | 1.50 ± 0.04† |
| <i>plk4</i>       | 1.33 ± 0.02 | 0.93 ± 0.02 | *  | 1.29 ± 0.02  | 0.85 ± 0.02  | *  | 1.25 ± 0.05  | 0.80 ± 0.02  | *  | 1.30 ± 0.04  | 0.86 ± 0.02  |
| <i>pmp22</i>      | 0.66 ± 0.02 | 1.04 ± 0.02 | *  | 0.79 ± 0.02  | 1.18 ± 0.02  | *† | 0.72 ± 0.01† | 1.35 ± 0.04† | *  | 0.74 ± 0.06  | 1.27 ± 0.03  |
| <i>ppm1d</i>      | 1.10 ± 0.02 | 0.98 ± 0.03 | *  | 0.99 ± 0.04  | 0.94 ± 0.02  |    | 1.03 ± 0.02  | 0.99 ± 0.02  |    | 1.12 ± 0.04  | 0.95 ± 0.03  |
| <i>ppm1g</i>      | 1.11 ± 0.03 | 0.92 ± 0.03 |    | 1.07 ± 0.03  | 0.95 ± 0.02  |    | 1.12 ± 0.03  | 0.90 ± 0.03  | †  | 1.02 ± 0.02† | 0.95 ± 0.03  |
| <i>ppp1r13b</i>   | 1.13 ± 0.03 | 1.03 ± 0.02 | *  | 1.06 ± 0.03  | 0.95 ± 0.03  | *  | 1.10 ± 0.04  | 0.90 ± 0.02  | *  | 1.06 ± 0.04  | 0.85 ± 0.02  |
| <i>ppp2ca</i>     | 1.04 ± 0.02 | 0.99 ± 0.03 |    | 1.00 ± 0.03  | 1.03 ± 0.02  |    | 1.05 ± 0.02  | 0.98 ± 0.02  |    | 0.98 ± 0.02  | 0.97 ± 0.02  |
| <i>ppp3ca</i>     | 0.91 ± 0.02 | 1.13 ± 0.03 |    | 0.94 ± 0.02  | 1.13 ± 0.03  |    | 0.89 ± 0.02  | 1.22 ± 0.04  |    | 0.94 ± 0.03  | 1.15 ± 0.03  |
| <i>ppp6c</i>      | 1.00 ± 0.01 | 1.00 ± 0.03 |    | 0.99 ± 0.03  | 0.94 ± 0.02  |    | 1.00 ± 0.01  | 0.98 ± 0.02  |    | 0.99 ± 0.03  | 1.03 ± 0.03  |
| <i>prok1</i>      | 1.09 ± 0.07 | 1.00 ± 0.03 | †  | 1.17 ± 0.09  | 0.84 ± 0.05  |    | 1.08 ± 0.04  | 1.01 ± 0.04  | *  | 0.99 ± 0.09  | 0.82 ± 0.05  |
| <i>psmd1</i>      | 1.02 ± 0.01 | 1.02 ± 0.01 | *† | 1.02 ± 0.01  | 0.98 ± 0.01† | *† | 1.00 ± 0.01  | 0.95 ± 0.01† | *  | 0.99 ± 0.01  | 0.98 ± 0.01  |
| <i>psmd8</i>      | 0.98 ± 0.02 | 1.02 ± 0.02 | †  | 0.94 ± 0.02  | 1.05 ± 0.01  |    | 0.98 ± 0.01  | 1.04 ± 0.01  | †  | 0.92 ± 0.02  | 1.06 ± 0.02  |
| <i>pten</i>       | 0.98 ± 0.03 | 1.14 ± 0.07 | *  | 0.93 ± 0.03  | 1.01 ± 0.02  |    | 0.95 ± 0.04  | 1.05 ± 0.03  |    | 1.02 ± 0.04  | 1.01 ± 0.03  |
| <i>ptgds</i>      | 1.03 ± 0.07 | 1.02 ± 0.06 |    | 0.97 ± 0.08  | 1.00 ± 0.05  |    | 1.08 ± 0.06  | 0.96 ± 0.03  |    | 1.13 ± 0.08  | 1.08 ± 0.09  |
| <i>ptgs2</i>      | 0.93 ± 0.10 | 1.09 ± 0.10 |    | 1.05 ± 0.10  | 0.98 ± 0.08  |    | 0.94 ± 0.06  | 1.19 ± 0.09  |    | 0.88 ± 0.07  | 1.08 ± 0.07  |
| <i>ptn</i>        | 0.92 ± 0.02 | 1.34 ± 0.02 | *† | 0.83 ± 0.01† | 1.11 ± 0.02† | *† | 0.84 ± 0.02† | 1.09 ± 0.02† |    | 0.91 ± 0.03  | 1.33 ± 0.05  |
| <i>ptp4a1</i>     | 0.95 ± 0.02 | 1.03 ± 0.01 |    | 0.95 ± 0.02  | 1.02 ± 0.02  |    | 0.96 ± 0.02  | 1.07 ± 0.02  |    | 0.93 ± 0.01  | 1.05 ± 0.02  |
| <i>pttgl</i>      | 1.11 ± 0.01 | 1.05 ± 0.02 | *  | 1.02 ± 0.01  | 0.97 ± 0.01  | *† | 1.01 ± 0.02† | 0.89 ± 0.01† | *  | 1.05 ± 0.02  | 0.98 ± 0.01  |
| <i>rad1</i>       | 1.06 ± 0.02 | 1.01 ± 0.03 |    | 1.04 ± 0.02  | 0.94 ± 0.02  | *  | 1.04 ± 0.02  | 0.92 ± 0.03  | *  | 0.98 ± 0.03  | 0.96 ± 0.02  |
| <i>rad50</i>      | 1.17 ± 0.03 | 0.94 ± 0.05 |    | 1.17 ± 0.05  | 0.93 ± 0.03  |    | 1.08 ± 0.04  | 0.90 ± 0.03  | *  | 1.00 ± 0.05  | 0.93 ± 0.01  |
| <i>rad9</i>       | 1.13 ± 0.04 | 0.89 ± 0.03 | †  | 1.08 ± 0.04  | 0.96 ± 0.02  |    | 1.13 ± 0.02  | 0.91 ± 0.03  |    | 1.02 ± 0.04  | 0.90 ± 0.03  |
| <i>raf1</i>       | 1.05 ± 0.02 | 0.98 ± 0.02 |    | 1.02 ± 0.02  | 0.98 ± 0.02  |    | 1.06 ± 0.02  | 0.99 ± 0.02  |    | 1.01 ± 0.03  | 0.96 ± 0.03  |
| <i>ran</i>        | 1.14 ± 0.01 | 0.91 ± 0.01 |    | 1.15 ± 0.01  | 0.92 ± 0.01  |    | 1.14 ± 0.02  | 0.92 ± 0.01  | †  | 1.10 ± 0.02  | 0.95 ± 0.02  |
| <i>rap-1a</i>     | 0.98 ± 0.02 | 1.02 ± 0.01 |    | 1.00 ± 0.02  | 0.98 ± 0.01  | *  | 0.96 ± 0.02  | 0.94 ± 0.01  |    | 1.03 ± 0.03  | 1.01 ± 0.02  |
| <i>rbl1</i>       | 1.01 ± 0.03 | 1.03 ± 0.03 | *  | 0.97 ± 0.03  | 0.94 ± 0.03  | *  | 0.96 ± 0.03  | 0.98 ± 0.03  |    | 1.00 ± 0.03  | 0.99 ± 0.03  |
| <i>rbl2</i>       | 0.92 ± 0.02 | 1.12 ± 0.03 | *  | 0.86 ± 0.02  | 1.08 ± 0.01  | *  | 0.90 ± 0.01  | 1.03 ± 0.01  |    | 0.90 ± 0.02  | 1.09 ± 0.01  |
| <i>rent1</i>      | 1.16 ± 0.09 | 0.95 ± 0.11 |    | 1.06 ± 0.09  | 0.81 ± 0.06  |    | 0.99 ± 0.09  | 0.91 ± 0.08  |    | 1.19 ± 0.09  | 0.97 ± 0.07  |
| <i>ret</i>        | 1.07 ± 0.02 | 0.93 ± 0.02 | *  | 1.00 ± 0.02  | 0.86 ± 0.02  | †  | 1.10 ± 0.03  | 0.87 ± 0.02  | *  | 1.17 ± 0.02  | 1.01 ± 0.02  |
| <i>rgd1560863</i> | 1.29 ± 0.03 | 0.82 ± 0.03 | †  | 1.25 ± 0.03  | 0.92 ± 0.02† |    | 1.27 ± 0.04  | 0.80 ± 0.03  | †  | 1.13 ± 0.03† | 0.86 ± 0.03  |
| <i>rgs2</i>       | 0.82 ± 0.06 | 1.33 ± 0.11 | *  | 1.03 ± 0.05  | 1.92 ± 0.08  | *  | 0.66 ± 0.03  | 0.90 ± 0.04  | †  | 0.62 ± 0.02† | 1.35 ± 0.06  |
| <i>ris2</i>       | 1.34 ± 0.03 | 0.90 ± 0.02 | *  | 1.23 ± 0.03  | 0.87 ± 0.01  |    | 1.34 ± 0.01  | 0.87 ± 0.01  | *  | 1.18 ± 0.04  | 0.85 ± 0.02  |
| <i>ros1</i>       | 0.97 ± 0.12 | 1.08 ± 0.09 |    | 0.98 ± 0.12  | 0.95 ± 0.09  |    | 0.92 ± 0.06  | 1.03 ± 0.11  |    | 0.93 ± 0.06  | 1.06 ± 0.07  |
| <i>rps4x</i>      | 1.02 ± 0.02 | 0.96 ± 0.03 |    | 1.05 ± 0.02  | 0.94 ± 0.03  |    | 0.97 ± 0.02  | 0.97 ± 0.02  |    | 1.01 ± 0.02  | 0.98 ± 0.03  |
| <i>s100a6</i>     | 1.09 ± 0.02 | 0.83 ± 0.02 | *  | 1.14 ± 0.01  | 0.87 ± 0.01  | *  | 1.12 ± 0.01  | 0.86 ± 0.02  |    | 1.14 ± 0.02  | 0.85 ± 0.02  |
| <i>sart1</i>      | 1.07 ± 0.02 | 1.04 ± 0.02 | *  | 1.00 ± 0.02  | 1.00 ± 0.02  | *  | 1.05 ± 0.01  | 0.96 ± 0.01  | *  | 0.98 ± 0.02  | 0.94 ± 0.01  |
| <i>scir-27</i>    | 1.09 ± 0.11 | 1.05 ± 0.10 |    | 1.06 ± 0.11  | 0.94 ± 0.08  |    | 0.97 ± 0.12  | 1.12 ± 0.09  |    | 0.92 ± 0.06  | 1.02 ± 0.07  |
| <i>sesn1</i>      | 0.91 ± 0.01 | 1.21 ± 0.05 |    | 0.91 ± 0.02  | 1.22 ± 0.01  |    | 0.93 ± 0.02  | 1.16 ± 0.03  | †  | 0.91 ± 0.02  | 1.34 ± 0.05† |
| <i>sfrs5</i>      | 0.98 ± 0.02 | 1.00 ± 0.05 |    | 0.96 ± 0.02  | 1.09 ± 0.03  | *  | 1.01 ± 0.03  | 1.14 ± 0.04  |    | 0.91 ± 0.06  | 1.00 ± 0.03  |
| <i>siah2</i>      | 1.04 ± 0.02 | 0.94 ± 0.02 | *  | 0.98 ± 0.05  | 0.89 ± 0.02  |    | 1.04 ± 0.03  | 0.97 ± 0.04  |    | 1.07 ± 0.02  | 0.94 ± 0.03  |
| <i>sipal1</i>     | 1.18 ± 0.02 | 0.95 ± 0.03 |    | 1.13 ± 0.04  | 0.91 ± 0.01  | *  | 1.13 ± 0.02  | 0.86 ± 0.02  |    | 1.09 ± 0.04  | 0.96 ± 0.02  |
| <i>sirt2</i>      | 0.90 ± 0.03 | 0.95 ± 0.03 | *† | 0.94 ± 0.04  | 1.25 ± 0.04† | *  | 1.00 ± 0.04  | 1.23 ± 0.03  | †  | 0.81 ± 0.03† | 1.11 ± 0.03† |
| <i>slc12a4</i>    | 0.98 ± 0.03 | 1.06 ± 0.03 | †  | 0.97 ± 0.02  | 1.16 ± 0.02† | *† | 1.01 ± 0.02  | 1.25 ± 0.02† | *  | 0.91 ± 0.02  | 0.96 ± 0.02  |
| <i>smpd3</i>      | 1.10 ± 0.02 | 1.06 ± 0.03 | *  | 1.00 ± 0.02  | 0.90 ± 0.01  | *† | 1.09 ± 0.02  | 0.88 ± 0.01† | *† | 1.07 ± 0.02  | 0.89 ± 0.01† |
| <i>snail</i>      | 0.97 ± 0.02 | 1.00 ± 0.03 |    | 0.96 ± 0.03  | 1.02 ± 0.02  |    | 0.96 ± 0.02  | 1.04 ± 0.02  |    | 1.02 ± 0.02  | 0.98 ± 0.03  |
| <i>socs1</i>      | 1.06 ± 0.07 | 0.98 ± 0.03 |    | 1.06 ± 0.06  | 1.08 ± 0.05  |    | 1.13 ± 0.10  | 0.87 ± 0.10  |    | 0.96 ± 0.06  | 0.92 ± 0.06  |
| <i>spag5</i>      | 1.21 ± 0.01 | 0.89 ± 0.02 | *  | 1.14 ± 0.02  | 0.85 ± 0.01  | *† | 1.18 ± 0.01  | 0.79 ± 0.01† | *  | 1.09 ± 0.01  | 0.82 ± 0.01  |
| <i>src</i>        | 0.96 ± 0.02 | 1.02 ± 0.02 |    | 0.95 ± 0.02  | 1.04 ± 0.02  | *  | 1.01 ± 0.02  | 1.04 ± 0.02  |    | 0.94 ± 0.02  | 1.02 ± 0.02  |
| <i>stag3</i>      | 1.06 ± 0.09 | 0.88 ± 0.08 |    | 1.09 ± 0.14  | 0.89 ± 0.05  |    | 1.06 ± 0.06  | 1.09 ± 0.13  |    | 1.00 ± 0.07  | 0.91 ± 0.07  |
| <i>stk6</i>       | 1.22 ± 0.02 | 0.87 ± 0.03 | *  | 1.13 ± 0.02  | 0.85 ± 0.01  | *  | 1.16 ± 0.03  | 0.77 ± 0.02  | †  | 1.14 ± 0.02† | 0.89 ± 0.02  |
| <i>sugt1</i>      | 1.01 ± 0.02 | 1.05 ± 0.02 |    | 0.99 ± 0.02  | 1.05 ± 0.02  | †  | 1.02 ± 0.01  | 0.98 ± 0.01† | *  | 0.96 ± 0.01  | 0.98 ± 0.02  |
| <i>tacc1a</i>     | 1.07 ± 0.02 | 0.96 ± 0.02 |    | 1.06 ± 0.02  | 0.94 ± 0.01  |    | 1.06 ± 0.02  | 0.93 ± 0.02  |    | 1.06 ± 0.03  | 0.97 ± 0.01  |
| <i>tacc3</i>      | 1.26 ± 0.03 | 0.82 ± 0.04 | †  | 1.19 ± 0.03  | 0.89 ± 0.02  |    | 1.23 ± 0.04  | 0.77 ± 0.02  |    | 1.11 ± 0.05  | 0.81 ± 0.03  |

|                  |             |             |    |              |              |    |              |              |    |              |             |
|------------------|-------------|-------------|----|--------------|--------------|----|--------------|--------------|----|--------------|-------------|
| <i>tada3l</i>    | 0.99 ± 0.02 | 1.09 ± 0.02 | *  | 0.95 ± 0.02  | 1.05 ± 0.01  | *  | 0.97 ± 0.01  | 1.03 ± 0.02  | *  | 0.95 ± 0.02  | 1.04 ± 0.02 |
| <i>tcf19</i>     | 1.21 ± 0.01 | 0.88 ± 0.02 |    | 1.19 ± 0.02  | 0.85 ± 0.01  | *† | 1.18 ± 0.01  | 0.77 ± 0.01† | *  | 1.11 ± 0.01  | 0.82 ± 0.01 |
| <i>tcfap2a</i>   | 0.97 ± 0.09 | 1.08 ± 0.11 |    | 1.04 ± 0.14  | 0.91 ± 0.10  |    | 0.95 ± 0.06  | 1.06 ± 0.11  |    | 0.93 ± 0.06  | 1.09 ± 0.08 |
| <i>tfdp2</i>     | 1.12 ± 0.01 | 0.99 ± 0.02 | *  | 1.04 ± 0.02  | 0.90 ± 0.01  | *  | 1.05 ± 0.03  | 0.91 ± 0.03  |    | 1.10 ± 0.04  | 1.01 ± 0.01 |
| <i>tgfa</i>      | 0.99 ± 0.09 | 1.08 ± 0.10 |    | 1.18 ± 0.12  | 0.99 ± 0.08  |    | 1.01 ± 0.10  | 1.13 ± 0.10  |    | 0.77 ± 0.09  | 1.07 ± 0.07 |
| <i>tgfb1</i>     | 0.91 ± 0.05 | 0.99 ± 0.04 | *  | 1.00 ± 0.06  | 1.12 ± 0.07  | *† | 0.93 ± 0.08  | 1.38 ± 0.13† | *  | 1.13 ± 0.11  | 1.25 ± 0.09 |
| <i>tgfb2</i>     | 1.04 ± 0.09 | 1.01 ± 0.09 |    | 1.14 ± 0.13  | 0.90 ± 0.09  |    | 0.99 ± 0.09  | 1.07 ± 0.09  |    | 1.06 ± 0.09  | 1.02 ± 0.07 |
| <i>tgfb3</i>     | 0.96 ± 0.02 | 1.06 ± 0.01 | †  | 0.89 ± 0.03  | 1.12 ± 0.03  | *† | 0.90 ± 0.01  | 1.24 ± 0.02† | †  | 0.83 ± 0.02† | 1.11 ± 0.03 |
| <i>thpo</i>      | 0.96 ± 0.05 | 1.10 ± 0.10 |    | 0.86 ± 0.07  | 1.07 ± 0.08  |    | 1.02 ± 0.06  | 1.01 ± 0.04  |    | 1.15 ± 0.12  | 0.99 ± 0.13 |
| <i>thra</i>      | 1.03 ± 0.01 | 0.96 ± 0.04 | †  | 0.96 ± 0.02  | 1.00 ± 0.02  |    | 1.04 ± 0.03  | 0.99 ± 0.02  |    | 0.98 ± 0.03  | 0.99 ± 0.03 |
| <i>tip120a</i>   | 1.09 ± 0.01 | 0.97 ± 0.02 | *  | 1.07 ± 0.01  | 0.94 ± 0.01  | *† | 1.06 ± 0.02  | 0.87 ± 0.01† |    | 1.06 ± 0.03  | 0.94 ± 0.02 |
| <i>tnfsf5ip1</i> | 0.97 ± 0.01 | 1.03 ± 0.02 |    | 0.95 ± 0.02  | 1.03 ± 0.02  |    | 0.94 ± 0.01  | 1.06 ± 0.02  |    | 0.97 ± 0.02  | 1.05 ± 0.02 |
| <i>tp53</i>      | 0.98 ± 0.04 | 1.04 ± 0.02 | *  | 0.94 ± 0.05  | 0.87 ± 0.03  | *  | 0.87 ± 0.04  | 0.91 ± 0.05  | †  | 1.06 ± 0.02  | 0.94 ± 0.05 |
| <i>trp53bp2</i>  | 1.01 ± 0.01 | 1.01 ± 0.02 | *  | 0.96 ± 0.02  | 0.98 ± 0.02  |    | 0.99 ± 0.02  | 1.04 ± 0.02  |    | 0.99 ± 0.03  | 1.01 ± 0.02 |
| <i>trp63</i>     | 1.07 ± 0.10 | 0.98 ± 0.10 |    | 1.00 ± 0.09  | 0.99 ± 0.08  |    | 1.09 ± 0.09  | 1.03 ± 0.11  |    | 0.89 ± 0.06  | 1.03 ± 0.07 |
| <i>tsc1</i>      | 0.99 ± 0.09 | 0.87 ± 0.10 |    | 1.00 ± 0.10  | 0.92 ± 0.03  | *  | 1.19 ± 0.10  | 1.00 ± 0.04  |    | 0.99 ± 0.07  | 0.90 ± 0.07 |
| <i>tsc2</i>      | 1.02 ± 0.03 | 0.99 ± 0.02 |    | 0.98 ± 0.02  | 1.03 ± 0.02  | *  | 1.06 ± 0.03  | 1.04 ± 0.02  | *  | 0.94 ± 0.02  | 0.91 ± 0.02 |
| <i>ttk</i>       | 1.29 ± 0.01 | 0.88 ± 0.01 | *  | 1.21 ± 0.03  | 0.81 ± 0.02  | *† | 1.18 ± 0.03† | 0.71 ± 0.01† | *† | 1.17 ± 0.01† | 0.85 ± 0.01 |
| <i>tube1</i>     | 1.33 ± 0.02 | 0.87 ± 0.03 | †  | 1.27 ± 0.02  | 0.92 ± 0.02  | *  | 1.26 ± 0.02  | 0.83 ± 0.02  | *† | 1.19 ± 0.03† | 0.88 ± 0.02 |
| <i>ubelc</i>     | 1.02 ± 0.03 | 0.97 ± 0.05 |    | 1.06 ± 0.02  | 0.99 ± 0.03  |    | 1.01 ± 0.04  | 0.91 ± 0.04  |    | 0.99 ± 0.04  | 0.95 ± 0.03 |
| <i>ube2c</i>     | 1.18 ± 0.03 | 0.89 ± 0.02 | *  | 1.14 ± 0.02  | 0.82 ± 0.01  | *  | 1.07 ± 0.01  | 0.75 ± 0.01  |    | 1.19 ± 0.03  | 0.88 ± 0.01 |
| <i>uchl1</i>     | 0.96 ± 0.02 | 1.05 ± 0.02 | †  | 1.01 ± 0.02  | 0.86 ± 0.02† |    | 0.97 ± 0.01  | 1.10 ± 0.02  | *  | 0.88 ± 0.03  | 1.00 ± 0.03 |
| <i>uhrfl</i>     | 1.35 ± 0.03 | 0.83 ± 0.05 |    | 1.22 ± 0.06  | 0.84 ± 0.02  |    | 1.29 ± 0.06  | 0.81 ± 0.03  |    | 1.21 ± 0.04  | 0.85 ± 0.03 |
| <i>usp16</i>     | 1.10 ± 0.02 | 0.90 ± 0.01 | *† | 1.09 ± 0.03  | 0.84 ± 0.01† |    | 1.12 ± 0.01  | 0.91 ± 0.01  | *  | 1.18 ± 0.03  | 0.95 ± 0.02 |
| <i>vav1</i>      | 0.94 ± 0.08 | 1.03 ± 0.09 |    | 1.18 ± 0.13  | 0.93 ± 0.08  |    | 1.06 ± 0.10  | 1.07 ± 0.09  |    | 0.96 ± 0.05  | 1.04 ± 0.07 |
| <i>vegf</i>      | 0.98 ± 0.03 | 1.06 ± 0.09 | *  | 0.85 ± 0.04  | 0.81 ± 0.03  |    | 0.91 ± 0.04  | 1.00 ± 0.07  | *  | 1.57 ± 0.08  | 1.50 ± 0.07 |
| <i>vegfb</i>     | 0.93 ± 0.02 | 1.06 ± 0.03 | *† | 0.91 ± 0.02  | 1.21 ± 0.03† | *  | 1.01 ± 0.02  | 1.24 ± 0.02  | *  | 0.84 ± 0.03  | 1.05 ± 0.03 |
| <i>vegfc</i>     | 0.91 ± 0.01 | 0.99 ± 0.02 | *  | 0.97 ± 0.01  | 1.08 ± 0.02  | *† | 1.00 ± 0.02† | 1.30 ± 0.02† | †  | 0.89 ± 0.01  | 1.03 ± 0.01 |
| <i>vh1</i>       | 1.06 ± 0.03 | 1.00 ± 0.04 | *  | 0.99 ± 0.03  | 0.89 ± 0.01  | *† | 1.05 ± 0.02  | 0.88 ± 0.02† | *† | 1.22 ± 0.03† | 1.00 ± 0.02 |
| <i>weel</i>      | 1.18 ± 0.02 | 0.90 ± 0.02 | *  | 1.08 ± 0.04  | 0.86 ± 0.02  | †  | 1.10 ± 0.02† | 0.91 ± 0.01  | *  | 1.29 ± 0.02  | 0.97 ± 0.02 |
| <i>wt1</i>       | 0.91 ± 0.08 | 1.06 ± 0.08 | †  | 1.20 ± 0.07† | 0.88 ± 0.09  | †  | 1.27 ± 0.10† | 1.00 ± 0.09  |    | 0.86 ± 0.09  | 0.95 ± 0.06 |
| <i>wwp2</i>      | 1.03 ± 0.02 | 0.95 ± 0.02 | †  | 0.99 ± 0.03  | 1.05 ± 0.03† | *  | 1.08 ± 0.02  | 1.09 ± 0.02  | †  | 0.94 ± 0.02† | 0.97 ± 0.03 |
| <i>zfp100</i>    | 1.03 ± 0.01 | 0.93 ± 0.02 | †  | 0.99 ± 0.02  | 0.96 ± 0.01  | *  | 1.07 ± 0.02  | 1.01 ± 0.02  |    | 1.02 ± 0.02  | 0.92 ± 0.02 |

Normalized expression ratios are given as mean ± SE obtained from eight independent samples in each group, each run on a separate array. Several of the values reported in this table have appeared in previous studies of other gene groupings [1-6].

\*Significant main treatment effect in two-factor ANOVA (treatment, region).

†Interaction of treatment × time; then, † denotes significant treatment effect for a given time point.

Global statistical analysis of Table 1: ANOVA factors of treatment, gene, time<sup>§</sup>

All treatments: treatment main effect,  $p < 0.0001$ ; treatment × gene,  $p < 0.0001$ ; treatment × time,  $p < 0.001$ ; treatment × gene × time,  $p < 0.0001$

Control vs. Diazinon: treatment main effect,  $p < 0.004$ ; treatment × gene,  $p < 0.0001$ ; treatment × time,  $p < 0.005$ ; treatment × gene × time,  $p < 0.0001$

Control vs. Dieldrin: treatment × gene,  $p < 0.0001$ ; treatment × gene × time,  $p < 0.001$

Control vs. Ni<sup>2+</sup>: treatment main effect,  $p < 0.0001$ ; treatment × gene,  $p < 0.0001$ ; treatment × time,  $p < 0.0001$ ; treatment × gene × time,  $p < 0.0001$

<sup>§</sup>results shown include only treatment effects and interactions of treatment with other variables

Supplemental Table 2. Apoptosis Genes

| Gene                 | Control     |             | Diazinon |              | Dieldrin     |    | Ni <sup>2+</sup> |              |    |              |              |
|----------------------|-------------|-------------|----------|--------------|--------------|----|------------------|--------------|----|--------------|--------------|
|                      | 24h         | 72h         |          | 24h          | 72h          |    | 24h              | 72h          |    | 24h          | 72h          |
| <i>1200013b22rik</i> | 1.15 ± 0.10 | 0.91 ± 0.05 | †        | 0.94 ± 0.06  | 1.01 ± 0.05  |    | 1.06 ± 0.10      | 0.93 ± 0.04  |    | 1.18 ± 0.05  | 0.99 ± 0.08  |
| <i>aatf</i>          | 0.94 ± 0.02 | 1.03 ± 0.02 |          | 0.95 ± 0.02  | 1.03 ± 0.01  |    | 0.96 ± 0.02      | 1.05 ± 0.02  |    | 0.98 ± 0.03  | 1.05 ± 0.02  |
| <i>aatk</i>          | 0.92 ± 0.06 | 1.10 ± 0.07 |          | 0.98 ± 0.09  | 1.04 ± 0.10  |    | 0.98 ± 0.07      | 1.10 ± 0.07  |    | 0.98 ± 0.09  | 0.99 ± 0.09  |
| <i>accn1</i>         | 1.15 ± 0.12 | 1.11 ± 0.11 | *        | 0.94 ± 0.09  | 0.91 ± 0.08  |    | 1.31 ± 0.12      | 1.02 ± 0.06  | *  | 0.83 ± 0.06  | 0.98 ± 0.07  |
| <i>actn1</i>         | 1.05 ± 0.03 | 0.87 ± 0.03 |          | 1.07 ± 0.03  | 0.92 ± 0.03  | *† | 1.09 ± 0.03      | 1.02 ± 0.03† |    | 1.06 ± 0.03  | 0.85 ± 0.02  |
| <i>actn2</i>         | 1.12 ± 0.05 | 1.03 ± 0.04 |          | 1.11 ± 0.05  | 0.92 ± 0.05  |    | 1.13 ± 0.08      | 0.97 ± 0.07  | *  | 0.94 ± 0.04  | 0.75 ± 0.03  |
| <i>actn4</i>         | 1.02 ± 0.01 | 0.94 ± 0.03 |          | 1.03 ± 0.01  | 0.97 ± 0.02  |    | 1.03 ± 0.02      | 0.97 ± 0.01  |    | 1.03 ± 0.02  | 0.99 ± 0.03  |
| <i>acvr1c</i>        | 0.85 ± 0.08 | 1.08 ± 0.10 | †        | 1.17 ± 0.11† | 0.96 ± 0.08  |    | 0.90 ± 0.06      | 1.11 ± 0.10  |    | 0.91 ± 0.06  | 1.03 ± 0.08  |
| <i>adam17</i>        | 1.02 ± 0.02 | 0.90 ± 0.04 | *†       | 1.08 ± 0.02  | 1.17 ± 0.02† | †  | 0.93 ± 0.02†     | 0.97 ± 0.02  | †  | 0.97 ± 0.03  | 1.02 ± 0.02† |
| <i>ahr</i>           | 1.19 ± 0.10 | 0.85 ± 0.06 | *        | 0.87 ± 0.06  | 0.75 ± 0.05  |    | 1.23 ± 0.15      | 1.10 ± 0.05  |    | 1.07 ± 0.10  | 1.04 ± 0.09  |
| <i>aip1l</i>         | 1.30 ± 0.18 | 1.22 ± 0.12 |          | 0.95 ± 0.10  | 1.20 ± 0.11  |    | 1.03 ± 0.06      | 1.05 ± 0.06  | *  | 0.85 ± 0.06  | 0.66 ± 0.08  |
| <i>akt1</i>          | 1.08 ± 0.04 | 0.96 ± 0.02 | †        | 1.02 ± 0.03  | 1.04 ± 0.03  |    | 1.12 ± 0.03      | 1.00 ± 0.02  |    | 1.00 ± 0.04  | 0.96 ± 0.04  |
| <i>alox12</i>        | 0.88 ± 0.11 | 1.08 ± 0.10 |          | 1.15 ± 0.13  | 1.01 ± 0.07  |    | 0.91 ± 0.06      | 1.14 ± 0.12  |    | 0.92 ± 0.06  | 1.06 ± 0.07  |
| <i>alox15</i>        | 0.86 ± 0.06 | 1.10 ± 0.04 |          | 0.98 ± 0.09  | 0.95 ± 0.12  | †  | 0.97 ± 0.05      | 0.93 ± 0.07  |    | 0.99 ± 0.11  | 0.94 ± 0.09  |
| <i>amid</i>          | 1.02 ± 0.03 | 0.99 ± 0.03 |          | 0.98 ± 0.02  | 1.03 ± 0.03  | *  | 1.05 ± 0.03      | 1.05 ± 0.02  | †  | 0.91 ± 0.03† | 1.01 ± 0.02  |
| <i>amigo2</i>        | 1.05 ± 0.06 | 0.93 ± 0.08 | *        | 0.82 ± 0.07  | 0.91 ± 0.07  | †  | 0.95 ± 0.06      | 1.14 ± 0.06† |    | 1.07 ± 0.08  | 1.13 ± 0.06  |
| <i>apaf1</i>         | 1.08 ± 0.03 | 1.02 ± 0.02 | *        | 1.00 ± 0.04  | 0.92 ± 0.02  | *† | 1.04 ± 0.03      | 0.85 ± 0.04† |    | 1.05 ± 0.02  | 0.96 ± 0.04  |
| <i>apbb2</i>         | 1.04 ± 0.03 | 0.95 ± 0.03 |          | 1.03 ± 0.03  | 0.98 ± 0.01  | *  | 1.15 ± 0.02      | 0.98 ± 0.03  | *  | 0.94 ± 0.04  | 0.90 ± 0.03  |
| <i>apbb3</i>         | 0.81 ± 0.02 | 1.26 ± 0.07 | *†       | 0.86 ± 0.02  | 1.62 ± 0.06† | *  | 0.88 ± 0.04      | 1.51 ± 0.05  | *  | 0.72 ± 0.01  | 1.22 ± 0.05  |
| <i>api2</i>          | 1.01 ± 0.01 | 1.00 ± 0.02 |          | 1.05 ± 0.02  | 0.99 ± 0.02  |    | 1.02 ± 0.02      | 0.98 ± 0.03  |    | 1.01 ± 0.02  | 0.99 ± 0.01  |
| <i>api5</i>          | 1.06 ± 0.01 | 0.91 ± 0.03 |          | 1.10 ± 0.02  | 0.90 ± 0.02  | *† | 1.06 ± 0.02      | 0.84 ± 0.01† |    | 1.05 ± 0.02  | 0.89 ± 0.02  |
| <i>apl1</i>          | 0.89 ± 0.02 | 1.10 ± 0.04 |          | 0.89 ± 0.03  | 1.15 ± 0.05  | *  | 0.92 ± 0.03      | 1.23 ± 0.05  |    | 0.92 ± 0.04  | 1.15 ± 0.03  |
| <i>apoe</i>          | 1.02 ± 0.02 | 1.04 ± 0.03 | *        | 0.95 ± 0.03  | 0.92 ± 0.02  |    | 1.03 ± 0.03      | 0.96 ± 0.03  |    | 1.05 ± 0.02  | 1.00 ± 0.03  |
| <i>app</i>           | 0.97 ± 0.01 | 1.03 ± 0.02 |          | 0.97 ± 0.01  | 1.03 ± 0.02  | *† | 0.97 ± 0.02      | 1.12 ± 0.02† |    | 0.95 ± 0.02  | 1.04 ± 0.01  |
| <i>apbb1</i>         | 1.15 ± 0.02 | 0.91 ± 0.03 |          | 1.16 ± 0.01  | 0.94 ± 0.02  |    | 1.12 ± 0.03      | 0.92 ± 0.01  |    | 1.10 ± 0.03  | 0.91 ± 0.02  |
| <i>arhgdia</i>       | 1.00 ± 0.01 | 1.03 ± 0.02 |          | 0.99 ± 0.01  | 1.00 ± 0.02  |    | 1.01 ± 0.03      | 1.02 ± 0.02  |    | 1.01 ± 0.03  | 1.00 ± 0.02  |
| <i>arhgef6</i>       | 1.10 ± 0.05 | 1.20 ± 0.11 | *        | 1.00 ± 0.11  | 0.91 ± 0.07  | *  | 0.86 ± 0.05      | 1.13 ± 0.08  | *  | 0.88 ± 0.06  | 0.96 ± 0.06  |
| <i>atm</i>           | 1.21 ± 0.06 | 0.97 ± 0.05 | *        | 1.06 ± 0.05  | 0.91 ± 0.04  | *  | 1.04 ± 0.02      | 0.91 ± 0.04  | *  | 1.09 ± 0.07  | 0.86 ± 0.04  |
| <i>aven</i>          | 1.02 ± 0.03 | 0.96 ± 0.04 | †        | 1.01 ± 0.03  | 1.05 ± 0.02  | *  | 1.06 ± 0.02      | 1.03 ± 0.02  |    | 0.96 ± 0.02  | 1.00 ± 0.02  |
| <i>axud1</i>         | 0.96 ± 0.02 | 1.02 ± 0.03 |          | 0.93 ± 0.04  | 1.03 ± 0.03  |    | 0.96 ± 0.04      | 1.06 ± 0.05  | *  | 1.00 ± 0.03  | 1.15 ± 0.06  |
| <i>bad</i>           | 1.00 ± 0.01 | 1.02 ± 0.02 |          | 0.96 ± 0.02  | 1.02 ± 0.01  |    | 1.04 ± 0.01      | 1.02 ± 0.02  | *  | 0.95 ± 0.01  | 0.94 ± 0.01  |
| <i>bag1</i>          | 0.94 ± 0.01 | 1.00 ± 0.03 | *†       | 0.96 ± 0.02  | 1.13 ± 0.02† | *† | 0.97 ± 0.02      | 1.13 ± 0.02† | *† | 0.95 ± 0.01  | 1.12 ± 0.02† |
| <i>bag3</i>          | 0.97 ± 0.02 | 0.94 ± 0.02 | *†       | 1.02 ± 0.02  | 1.07 ± 0.01† | *† | 0.97 ± 0.02      | 1.08 ± 0.02† | *† | 0.97 ± 0.01  | 1.02 ± 0.01† |
| <i>bak1</i>          | 1.09 ± 0.01 | 0.89 ± 0.02 | *†       | 1.09 ± 0.01  | 0.83 ± 0.01† | *† | 1.08 ± 0.01      | 0.78 ± 0.01† | †  | 1.11 ± 0.02  | 0.83 ± 0.01† |
| <i>bat3</i>          | 1.03 ± 0.04 | 1.05 ± 0.04 | *        | 0.95 ± 0.02  | 0.97 ± 0.02  |    | 0.97 ± 0.03      | 1.05 ± 0.02  |    | 1.01 ± 0.03  | 1.05 ± 0.02  |
| <i>bax</i>           | 0.98 ± 0.01 | 1.01 ± 0.02 | *        | 0.99 ± 0.01  | 1.06 ± 0.01  | *  | 1.04 ± 0.01      | 1.02 ± 0.02  | *  | 0.92 ± 0.01  | 0.95 ± 0.01  |
| <i>bbc3</i>          | 0.81 ± 0.01 | 1.29 ± 0.04 | †        | 0.79 ± 0.01  | 1.38 ± 0.02† | *† | 0.83 ± 0.01      | 1.52 ± 0.02† | †  | 0.85 ± 0.01  | 1.22 ± 0.02  |
| <i>bbp</i>           | 1.06 ± 0.03 | 0.94 ± 0.04 |          | 1.02 ± 0.04  | 0.96 ± 0.03  |    | 1.05 ± 0.04      | 0.94 ± 0.03  |    | 1.00 ± 0.05  | 0.97 ± 0.04  |
| <i>bcl10</i>         | 1.09 ± 0.02 | 0.89 ± 0.01 |          | 1.14 ± 0.02  | 0.89 ± 0.01  |    | 1.08 ± 0.02      | 0.90 ± 0.01  | *  | 1.25 ± 0.03  | 0.98 ± 0.02  |
| <i>bcl2</i>          | 1.12 ± 0.07 | 1.06 ± 0.11 | *        | 0.84 ± 0.06  | 0.86 ± 0.06  |    | 1.01 ± 0.08      | 1.09 ± 0.12  |    | 1.11 ± 0.04  | 1.01 ± 0.10  |
| <i>bcl2a1</i>        | 0.97 ± 0.07 | 1.11 ± 0.08 |          | 1.15 ± 0.13  | 0.95 ± 0.07  |    | 0.96 ± 0.16      | 1.07 ± 0.11  |    | 0.93 ± 0.06  | 1.03 ± 0.07  |
| <i>bcl2l1</i>        | 1.00 ± 0.02 | 0.91 ± 0.04 |          | 0.99 ± 0.03  | 1.00 ± 0.02  | †  | 0.99 ± 0.01      | 1.01 ± 0.02  | *  | 1.14 ± 0.03  | 1.06 ± 0.03  |
| <i>bcl2l10</i>       | 1.04 ± 0.03 | 1.19 ± 0.05 | *        | 0.95 ± 0.02  | 1.05 ± 0.03  | *  | 0.95 ± 0.03      | 0.95 ± 0.02  | *  | 1.00 ± 0.05  | 1.01 ± 0.04  |
| <i>bcl2l11</i>       | 0.95 ± 0.07 | 0.89 ± 0.06 |          | 0.99 ± 0.13  | 1.00 ± 0.08  | †  | 0.68 ± 0.05†     | 1.58 ± 0.14† |    | 1.01 ± 0.10  | 1.14 ± 0.08  |
| <i>bcl2l13</i>       | 1.07 ± 0.07 | 0.84 ± 0.02 | *        | 1.14 ± 0.05  | 1.05 ± 0.04  | *  | 1.13 ± 0.04      | 1.01 ± 0.03  | †  | 1.01 ± 0.06  | 1.02 ± 0.07† |
| <i>bcl2l2</i>        | 1.03 ± 0.02 | 0.98 ± 0.03 |          | 1.03 ± 0.02  | 0.99 ± 0.03  |    | 1.06 ± 0.04      | 0.97 ± 0.02  | *  | 0.98 ± 0.03  | 0.93 ± 0.02  |
| <i>bcl6</i>          | 0.66 ± 0.09 | 1.02 ± 0.07 | *        | 1.20 ± 0.08  | 1.31 ± 0.16  | *  | 0.87 ± 0.09      | 1.15 ± 0.05  | †  | 1.03 ± 0.13† | 0.96 ± 0.07  |
| <i>bclx</i>          | 1.00 ± 0.02 | 0.99 ± 0.02 | *        | 0.96 ± 0.03  | 0.96 ± 0.01  |    | 1.03 ± 0.01      | 0.99 ± 0.01  | *  | 1.12 ± 0.02  | 1.05 ± 0.02  |
| <i>bdnf</i>          | 0.98 ± 0.09 | 1.07 ± 0.06 |          | 1.08 ± 0.11  | 1.03 ± 0.11  |    | 0.93 ± 0.14      | 1.12 ± 0.11  |    | 0.95 ± 0.07  | 1.03 ± 0.05  |
| <i>bfar</i>          | 0.94 ± 0.02 | 1.03 ± 0.04 | *        | 0.96 ± 0.02  | 1.12 ± 0.02  | *  | 0.97 ± 0.02      | 1.13 ± 0.03  |    | 0.94 ± 0.03  | 1.10 ± 0.03  |
| <i>bid</i>           | 0.98 ± 0.04 | 0.93 ± 0.07 |          | 0.96 ± 0.03  | 1.07 ± 0.05  | *  | 1.02 ± 0.04      | 1.04 ± 0.04  | †  | 0.94 ± 0.03  | 1.10 ± 0.04  |
| <i>bid3</i>          | 0.89 ± 0.02 | 1.33 ± 0.05 | *        | 0.74 ± 0.02  | 1.01 ± 0.03  | †  | 0.98 ± 0.01      | 1.28 ± 0.02  | †  | 0.96 ± 0.01  | 1.17 ± 0.03† |
| <i>bik1k</i>         | 1.09 ± 0.02 | 1.03 ± 0.02 | *        | 0.98 ± 0.02  | 0.94 ± 0.02  | *  | 1.07 ± 0.02      | 0.94 ± 0.01  | *† | 1.10 ± 0.01  | 0.90 ± 0.02† |
| <i>birc1b</i>        | 0.98 ± 0.08 | 1.13 ± 0.07 |          | 1.02 ± 0.12  | 0.88 ± 0.07  |    | 0.98 ± 0.06      | 1.10 ± 0.11  |    | 0.89 ± 0.06  | 1.02 ± 0.07  |
| <i>birc3</i>         | 1.07 ± 0.13 | 1.07 ± 0.11 |          | 1.01 ± 0.09  | 1.00 ± 0.07  | †  | 0.91 ± 0.05      | 1.78 ± 0.20† | *  | 0.73 ± 0.09  | 0.84 ± 0.09  |

Supplemental Table 2 (continued)

|                 |             |             |    |              |              |    |              |              |    |              |              |
|-----------------|-------------|-------------|----|--------------|--------------|----|--------------|--------------|----|--------------|--------------|
| <i>birc4</i>    | 1.04 ± 0.03 | 1.01 ± 0.07 |    | 1.03 ± 0.05  | 0.88 ± 0.04  |    | 1.07 ± 0.03  | 0.87 ± 0.04  |    | 1.14 ± 0.07  | 0.96 ± 0.03  |
| <i>birc5</i>    | 1.21 ± 0.02 | 1.00 ± 0.01 | *† | 1.02 ± 0.04† | 0.98 ± 0.03  | *  | 1.11 ± 0.02  | 0.84 ± 0.03  | *† | 0.95 ± 0.04† | 0.94 ± 0.03  |
| <i>birc6</i>    | 1.03 ± 0.04 | 0.94 ± 0.05 |    | 1.01 ± 0.02  | 0.95 ± 0.03  |    | 1.01 ± 0.03  | 0.93 ± 0.04  |    | 1.03 ± 0.04  | 1.00 ± 0.04  |
| <i>bmf</i>      | 0.89 ± 0.05 | 1.34 ± 0.13 | *  | 0.88 ± 0.14  | 0.81 ± 0.09  |    | 0.99 ± 0.11  | 1.32 ± 0.12  | *† | 1.07 ± 0.13  | 0.77 ± 0.08† |
| <i>bnip1</i>    | 1.06 ± 0.02 | 0.97 ± 0.03 |    | 1.03 ± 0.02  | 1.02 ± 0.02  |    | 1.06 ± 0.02  | 0.97 ± 0.02  |    | 0.99 ± 0.04  | 0.95 ± 0.02  |
| <i>bnip2</i>    | 1.13 ± 0.01 | 0.92 ± 0.03 |    | 1.11 ± 0.02  | 0.91 ± 0.01  |    | 1.11 ± 0.02  | 0.89 ± 0.01  |    | 1.17 ± 0.03  | 0.94 ± 0.02  |
| <i>bnip3</i>    | 0.90 ± 0.01 | 1.07 ± 0.02 | *  | 0.81 ± 0.01  | 0.96 ± 0.02  | †  | 0.85 ± 0.01  | 1.12 ± 0.03  | *† | 1.16 ± 0.04† | 1.70 ± 0.04† |
| <i>bnip3l</i>   | 0.82 ± 0.01 | 1.18 ± 0.02 | *  | 0.73 ± 0.01  | 1.08 ± 0.01  | *  | 0.77 ± 0.01  | 1.10 ± 0.01  | *† | 0.92 ± 0.01† | 1.53 ± 0.02† |
| <i>bok</i>      | 1.06 ± 0.03 | 0.91 ± 0.03 | †  | 1.02 ± 0.02  | 1.01 ± 0.02† |    | 1.02 ± 0.02  | 0.94 ± 0.02  | †  | 0.99 ± 0.03  | 1.03 ± 0.02  |
| <i>brca1</i>    | 1.26 ± 0.03 | 0.81 ± 0.04 |    | 1.17 ± 0.03  | 0.78 ± 0.05  | *  | 1.12 ± 0.03  | 0.79 ± 0.02  |    | 1.10 ± 0.03  | 0.83 ± 0.07  |
| <i>btbd14b</i>  | 1.06 ± 0.06 | 1.00 ± 0.04 |    | 1.01 ± 0.06  | 0.94 ± 0.03  | †  | 1.06 ± 0.03  | 0.84 ± 0.03† |    | 1.14 ± 0.03  | 0.98 ± 0.05  |
| <i>btg1</i>     | 0.86 ± 0.02 | 1.17 ± 0.01 | *  | 0.83 ± 0.02  | 1.10 ± 0.02  | †  | 0.86 ± 0.01  | 1.24 ± 0.01† |    | 0.92 ± 0.02  | 1.17 ± 0.02  |
| <i>c6</i>       | 1.30 ± 0.13 | 1.02 ± 0.05 |    | 1.30 ± 0.19  | 0.83 ± 0.06  |    | 1.46 ± 0.21  | 1.08 ± 0.18  |    | 1.29 ± 0.20  | 0.78 ± 0.12  |
| <i>c7</i>       | 1.31 ± 0.15 | 1.13 ± 0.09 | *  | 1.04 ± 0.08  | 0.85 ± 0.14  |    | 1.11 ± 0.13  | 0.97 ± 0.08  | *  | 0.85 ± 0.06  | 0.83 ± 0.07  |
| <i>c9</i>       | 1.48 ± 0.22 | 1.28 ± 0.30 |    | 1.46 ± 0.26  | 1.16 ± 0.22  |    | 1.37 ± 0.26  | 1.39 ± 0.25  | *  | 1.08 ± 0.10  | 0.77 ± 0.06  |
| <i>card10</i>   | 1.23 ± 0.07 | 0.95 ± 0.04 |    | 1.10 ± 0.05  | 0.94 ± 0.03  |    | 1.16 ± 0.02  | 1.00 ± 0.05  | *  | 0.95 ± 0.02  | 0.86 ± 0.03  |
| <i>card12</i>   | 1.01 ± 0.10 | 1.11 ± 0.06 |    | 1.12 ± 0.12  | 0.89 ± 0.12  |    | 0.99 ± 0.10  | 1.01 ± 0.10  | *  | 0.87 ± 0.05  | 0.95 ± 0.06  |
| <i>casp1</i>    | 0.88 ± 0.06 | 1.05 ± 0.09 |    | 1.09 ± 0.12  | 0.94 ± 0.08  |    | 1.00 ± 0.10  | 1.08 ± 0.10  |    | 0.97 ± 0.06  | 1.08 ± 0.07  |
| <i>casp12</i>   | 0.78 ± 0.10 | 0.95 ± 0.10 |    | 0.87 ± 0.09  | 0.93 ± 0.06  | *  | 1.04 ± 0.07  | 1.73 ± 0.20  |    | 0.97 ± 0.09  | 0.90 ± 0.06  |
| <i>casp14</i>   | 0.91 ± 0.12 | 0.98 ± 0.12 |    | 1.02 ± 0.10  | 0.93 ± 0.11  |    | 0.98 ± 0.10  | 1.07 ± 0.09  |    | 1.03 ± 0.12  | 0.94 ± 0.10  |
| <i>casp2</i>    | 1.02 ± 0.02 | 1.05 ± 0.01 | *  | 0.98 ± 0.01  | 0.95 ± 0.01  |    | 1.00 ± 0.01  | 1.02 ± 0.03  | *† | 1.05 ± 0.02  | 0.95 ± 0.02† |
| <i>casp3</i>    | 0.94 ± 0.01 | 1.12 ± 0.02 |    | 0.92 ± 0.01  | 1.14 ± 0.02  |    | 0.94 ± 0.01  | 1.11 ± 0.01  | *  | 0.88 ± 0.02  | 1.06 ± 0.02  |
| <i>casp4</i>    | 0.83 ± 0.05 | 1.00 ± 0.12 | †  | 0.83 ± 0.09  | 1.30 ± 0.07† | *† | 0.98 ± 0.06  | 4.36 ± 0.23† |    | 0.86 ± 0.04  | 1.08 ± 0.04  |
| <i>casp6</i>    | 0.90 ± 0.02 | 1.20 ± 0.06 | *  | 0.87 ± 0.02  | 1.11 ± 0.02  |    | 0.91 ± 0.03  | 1.14 ± 0.02  | †  | 0.97 ± 0.03  | 1.13 ± 0.03  |
| <i>casp7</i>    | 1.08 ± 0.01 | 1.03 ± 0.02 | *  | 1.00 ± 0.03  | 0.95 ± 0.01  | *† | 1.05 ± 0.02  | 0.90 ± 0.02† | *† | 1.01 ± 0.01† | 0.85 ± 0.03† |
| <i>casp8</i>    | 1.02 ± 0.05 | 0.88 ± 0.05 | *† | 1.01 ± 0.03  | 1.11 ± 0.03† | †  | 0.95 ± 0.04  | 1.17 ± 0.02† | †  | 0.86 ± 0.02† | 0.96 ± 0.03  |
| <i>casp8ap2</i> | 1.08 ± 0.02 | 1.00 ± 0.03 | *† | 1.05 ± 0.02  | 0.89 ± 0.02† | *† | 1.06 ± 0.03  | 0.89 ± 0.02† |    | 1.15 ± 0.03  | 0.97 ± 0.03  |
| <i>casp9</i>    | 1.06 ± 0.04 | 1.01 ± 0.03 |    | 1.04 ± 0.04  | 1.04 ± 0.04  |    | 1.07 ± 0.03  | 0.97 ± 0.02  | *  | 0.96 ± 0.02  | 0.89 ± 0.03  |
| <i>cbl27</i>    | 1.02 ± 0.02 | 1.04 ± 0.02 | *  | 0.99 ± 0.03  | 0.99 ± 0.02  |    | 0.98 ± 0.02  | 1.01 ± 0.04  | *  | 0.99 ± 0.02  | 0.99 ± 0.03  |
| <i>cck</i>      | 0.93 ± 0.03 | 1.14 ± 0.09 |    | 0.95 ± 0.05  | 0.99 ± 0.04  |    | 0.93 ± 0.03  | 1.13 ± 0.05  |    | 0.96 ± 0.07  | 1.09 ± 0.05  |
| <i>ccl6</i>     | 0.85 ± 0.13 | 1.02 ± 0.09 | *  | 1.13 ± 0.09  | 1.38 ± 0.13  |    | 1.00 ± 0.08  | 1.01 ± 0.11  |    | 0.89 ± 0.06  | 1.03 ± 0.12  |
| <i>cd2</i>      | 0.97 ± 0.09 | 1.07 ± 0.09 |    | 1.08 ± 0.11  | 0.96 ± 0.08  |    | 0.91 ± 0.06  | 1.11 ± 0.10  |    | 0.92 ± 0.06  | 1.06 ± 0.07  |
| <i>cd28</i>     | 0.90 ± 0.11 | 1.10 ± 0.10 |    | 1.06 ± 0.09  | 0.98 ± 0.08  |    | 0.92 ± 0.06  | 1.14 ± 0.10  |    | 0.90 ± 0.06  | 1.07 ± 0.07  |
| <i>cd38</i>     | 0.89 ± 0.06 | 1.07 ± 0.10 |    | 1.05 ± 0.10  | 0.95 ± 0.08  |    | 0.94 ± 0.05  | 1.06 ± 0.11  |    | 0.91 ± 0.06  | 1.05 ± 0.07  |
| <i>cd3e</i>     | 1.06 ± 0.13 | 0.97 ± 0.06 |    | 1.20 ± 0.16  | 0.95 ± 0.10  |    | 1.04 ± 0.08  | 1.00 ± 0.10  |    | 1.26 ± 0.16  | 0.89 ± 0.06  |
| <i>cd3g</i>     | 1.10 ± 0.02 | 1.06 ± 0.02 | *† | 0.95 ± 0.01† | 0.77 ± 0.01† | *† | 1.09 ± 0.02  | 0.83 ± 0.03† | *† | 1.07 ± 0.02  | 0.74 ± 0.02† |
| <i>cd51</i>     | 0.96 ± 0.09 | 1.06 ± 0.12 |    | 1.10 ± 0.12  | 0.95 ± 0.08  |    | 1.02 ± 0.11  | 1.10 ± 0.10  |    | 0.87 ± 0.08  | 1.04 ± 0.08  |
| <i>cdkn1a</i>   | 0.84 ± 0.02 | 1.31 ± 0.04 |    | 0.81 ± 0.04  | 1.32 ± 0.04  | *  | 0.77 ± 0.04  | 1.18 ± 0.03  | †  | 0.74 ± 0.06  | 1.44 ± 0.04  |
| <i>cebpb</i>    | 0.87 ± 0.01 | 0.99 ± 0.03 | *  | 0.99 ± 0.02  | 1.12 ± 0.02  | *† | 0.87 ± 0.02  | 1.11 ± 0.02† | *  | 0.94 ± 0.02  | 1.16 ± 0.02  |
| <i>cfdp1</i>    | 0.98 ± 0.01 | 0.96 ± 0.01 | *  | 1.02 ± 0.01  | 1.01 ± 0.01  | *  | 1.02 ± 0.01  | 1.03 ± 0.01  |    | 0.99 ± 0.01  | 0.94 ± 0.01  |
| <i>cflar</i>    | 1.00 ± 0.03 | 1.11 ± 0.05 |    | 0.97 ± 0.03  | 1.06 ± 0.02  |    | 1.01 ± 0.04  | 1.01 ± 0.02  | *  | 0.95 ± 0.03  | 0.99 ± 0.03  |
| <i>cias1</i>    | 0.95 ± 0.08 | 1.06 ± 0.11 |    | 1.23 ± 0.14  | 1.00 ± 0.09  |    | 0.95 ± 0.05  | 1.14 ± 0.10  |    | 0.90 ± 0.07  | 1.05 ± 0.08  |
| <i>cidea</i>    | 0.91 ± 0.01 | 1.06 ± 0.04 | *  | 1.02 ± 0.03  | 1.17 ± 0.02  | *  | 0.96 ± 0.02  | 1.16 ± 0.02  | *  | 0.88 ± 0.01  | 0.98 ± 0.02  |
| <i>cideb</i>    | 1.04 ± 0.08 | 1.02 ± 0.03 |    | 1.03 ± 0.08  | 0.98 ± 0.05  |    | 1.01 ± 0.05  | 0.99 ± 0.08  | *  | 0.83 ± 0.04  | 0.99 ± 0.07  |
| <i>cipar1</i>   | 1.05 ± 0.02 | 0.96 ± 0.02 | *† | 1.04 ± 0.01  | 0.84 ± 0.01† | *† | 1.08 ± 0.01  | 0.84 ± 0.01† | *† | 1.06 ± 0.01  | 0.87 ± 0.01† |
| <i>col18a1</i>  | 1.05 ± 0.03 | 1.00 ± 0.04 |    | 1.15 ± 0.09  | 0.95 ± 0.07  | *† | 1.05 ± 0.02  | 0.81 ± 0.04† | *† | 0.95 ± 0.04  | 0.72 ± 0.04† |
| <i>cradd</i>    | 0.90 ± 0.06 | 1.01 ± 0.09 |    | 0.90 ± 0.06  | 1.21 ± 0.08  |    | 0.99 ± 0.09  | 1.08 ± 0.06  |    | 0.85 ± 0.05  | 1.00 ± 0.05  |
| <i>creb1</i>    | 1.09 ± 0.02 | 0.91 ± 0.03 |    | 1.10 ± 0.02  | 0.89 ± 0.01  |    | 1.06 ± 0.03  | 0.91 ± 0.02  |    | 1.03 ± 0.02  | 0.93 ± 0.01  |
| <i>cse1l</i>    | 1.14 ± 0.01 | 0.89 ± 0.01 |    | 1.13 ± 0.03  | 0.93 ± 0.02  | †  | 1.06 ± 0.03† | 0.90 ± 0.03  | †  | 1.09 ± 0.05  | 0.96 ± 0.02  |
| <i>ctsb</i>     | 0.81 ± 0.02 | 1.03 ± 0.02 | *  | 0.91 ± 0.01  | 1.12 ± 0.02  | *† | 0.97 ± 0.02† | 1.34 ± 0.01† | †  | 0.86 ± 0.01  | 1.01 ± 0.02  |
| <i>cugbp2</i>   | 0.89 ± 0.09 | 1.09 ± 0.09 | †  | 1.06 ± 0.09  | 0.94 ± 0.09  |    | 0.89 ± 0.06  | 1.09 ± 0.09  |    | 0.87 ± 0.08  | 1.04 ± 0.07  |
| <i>cull1</i>    | 1.03 ± 0.03 | 0.93 ± 0.02 |    | 1.05 ± 0.02  | 0.95 ± 0.03  | †  | 1.01 ± 0.02  | 0.99 ± 0.02  | *  | 1.07 ± 0.03  | 0.97 ± 0.02  |
| <i>cull2</i>    | 1.07 ± 0.03 | 0.93 ± 0.04 |    | 1.06 ± 0.06  | 0.90 ± 0.04  | †  | 0.96 ± 0.04  | 0.99 ± 0.04  | *  | 1.23 ± 0.09  | 1.13 ± 0.07  |
| <i>cull3</i>    | 1.05 ± 0.03 | 1.00 ± 0.03 | *† | 1.05 ± 0.03  | 0.90 ± 0.02† |    | 1.01 ± 0.02  | 0.96 ± 0.02  |    | 1.12 ± 0.03  | 1.01 ± 0.03  |
| <i>dad1</i>     | 0.97 ± 0.01 | 1.06 ± 0.02 | *† | 0.97 ± 0.02  | 0.95 ± 0.01† | *† | 0.97 ± 0.01  | 0.99 ± 0.02† | *  | 1.01 ± 0.01  | 1.08 ± 0.01  |
| <i>dap</i>      | 0.91 ± 0.02 | 0.97 ± 0.03 | *  | 1.03 ± 0.06  | 1.16 ± 0.03  | *  | 1.05 ± 0.03  | 1.19 ± 0.02  | *† | 0.78 ± 0.02† | 0.95 ± 0.03  |
| <i>dap3</i>     | 1.03 ± 0.01 | 0.92 ± 0.02 |    | 1.03 ± 0.01  | 0.93 ± 0.02  | *† | 1.05 ± 0.01  | 0.99 ± 0.01† | *  | 1.05 ± 0.02  | 0.96 ± 0.02  |
| <i>dapk1</i>    | 0.90 ± 0.02 | 1.09 ± 0.03 |    | 0.86 ± 0.02  | 1.08 ± 0.02  |    | 0.91 ± 0.02  | 1.13 ± 0.02  |    | 0.89 ± 0.03  | 1.09 ± 0.03  |

Supplemental Table 2 (continued)

|                 |             |             |    |              |              |    |              |              |    |              |              |
|-----------------|-------------|-------------|----|--------------|--------------|----|--------------|--------------|----|--------------|--------------|
| <i>dapkl</i>    | 0.95 ± 0.02 | 1.02 ± 0.04 | †  | 0.89 ± 0.02  | 1.07 ± 0.02  |    | 0.96 ± 0.03  | 1.05 ± 0.03  |    | 0.91 ± 0.02  | 1.09 ± 0.03  |
| <i>daxx</i>     | 1.17 ± 0.01 | 0.97 ± 0.01 |    | 1.16 ± 0.01  | 0.95 ± 0.01  | *† | 1.17 ± 0.01  | 0.93 ± 0.01† | *  | 1.12 ± 0.01  | 0.96 ± 0.01  |
| <i>dcc</i>      | 1.00 ± 0.10 | 1.04 ± 0.11 |    | 1.16 ± 0.13  | 0.95 ± 0.07  |    | 1.20 ± 0.13  | 1.11 ± 0.10  |    | 0.90 ± 0.06  | 1.04 ± 0.08  |
| <i>ddit3</i>    | 0.99 ± 0.01 | 0.87 ± 0.02 | *  | 1.07 ± 0.02  | 0.98 ± 0.01  | *† | 1.10 ± 0.01† | 1.39 ± 0.03† | †  | 0.94 ± 0.02  | 0.96 ± 0.02† |
| <i>ddit4</i>    | 0.89 ± 0.04 | 0.96 ± 0.05 | †  | 0.77 ± 0.03† | 1.18 ± 0.03† | *† | 0.91 ± 0.02  | 1.21 ± 0.03† | *† | 0.93 ± 0.02  | 1.40 ± 0.05† |
| <i>dedd</i>     | 0.99 ± 0.01 | 0.97 ± 0.03 |    | 1.00 ± 0.02  | 1.01 ± 0.01  | *† | 1.00 ± 0.01  | 1.04 ± 0.01† |    | 0.97 ± 0.02  | 0.96 ± 0.02  |
| <i>dffa</i>     | 0.96 ± 0.02 | 1.08 ± 0.05 |    | 0.98 ± 0.04  | 1.03 ± 0.03  |    | 0.98 ± 0.03  | 1.06 ± 0.05  |    | 0.96 ± 0.02  | 1.02 ± 0.03  |
| <i>dffb</i>     | 0.92 ± 0.07 | 1.15 ± 0.10 |    | 0.93 ± 0.06  | 1.08 ± 0.15  |    | 1.16 ± 0.10  | 1.14 ± 0.09  |    | 1.06 ± 0.14  | 0.91 ± 0.09  |
| <i>dhcr24</i>   | 1.00 ± 0.02 | 0.97 ± 0.06 |    | 0.93 ± 0.05  | 1.00 ± 0.03  |    | 1.10 ± 0.05  | 1.01 ± 0.04  |    | 0.94 ± 0.05  | 0.98 ± 0.03  |
| <i>diablo</i>   | 1.09 ± 0.02 | 1.00 ± 0.02 | *  | 1.02 ± 0.01  | 0.93 ± 0.01  | *† | 1.03 ± 0.02  | 0.81 ± 0.02† |    | 1.08 ± 0.01  | 0.98 ± 0.02  |
| <i>dlx1</i>     | 0.97 ± 0.03 | 1.02 ± 0.06 |    | 0.89 ± 0.04  | 1.06 ± 0.01  |    | 0.98 ± 0.02  | 1.06 ± 0.03  |    | 0.96 ± 0.06  | 1.05 ± 0.05  |
| <i>dnajb9</i>   | 0.95 ± 0.02 | 1.04 ± 0.02 |    | 0.97 ± 0.01  | 1.06 ± 0.02  | †  | 0.91 ± 0.02  | 1.09 ± 0.01  |    | 0.96 ± 0.03  | 1.06 ± 0.02  |
| <i>dnase1</i>   | 1.06 ± 0.03 | 0.90 ± 0.04 |    | 1.07 ± 0.03  | 0.94 ± 0.02  |    | 1.06 ± 0.03  | 0.80 ± 0.03  | †  | 1.02 ± 0.04  | 1.02 ± 0.03† |
| <i>dnase1l3</i> | 1.05 ± 0.14 | 0.96 ± 0.08 |    | 0.95 ± 0.13  | 1.24 ± 0.10  | †  | 0.79 ± 0.10  | 1.24 ± 0.13  | †  | 0.81 ± 0.08  | 1.44 ± 0.11† |
| <i>dnase2</i>   | 1.03 ± 0.02 | 0.95 ± 0.02 | *  | 1.06 ± 0.02  | 1.00 ± 0.01  | *  | 1.10 ± 0.02  | 1.03 ± 0.01  | †  | 0.95 ± 0.02  | 0.99 ± 0.02  |
| <i>dnm2</i>     | 1.00 ± 0.02 | 1.03 ± 0.03 |    | 0.94 ± 0.02  | 1.01 ± 0.02  |    | 1.04 ± 0.05  | 1.02 ± 0.03  | *  | 0.94 ± 0.03  | 0.95 ± 0.03  |
| <i>dpf2</i>     | 1.08 ± 0.02 | 0.95 ± 0.01 | *  | 1.06 ± 0.01  | 0.90 ± 0.02  |    | 1.05 ± 0.02  | 0.96 ± 0.02  |    | 1.04 ± 0.03  | 0.92 ± 0.03  |
| <i>dusp22</i>   | 1.08 ± 0.02 | 0.92 ± 0.01 |    | 1.12 ± 0.01  | 0.92 ± 0.01  | *  | 1.15 ± 0.01  | 0.97 ± 0.01  |    | 1.05 ± 0.01  | 0.93 ± 0.01  |
| <i>dustypk</i>  | 1.04 ± 0.03 | 0.97 ± 0.04 |    | 1.07 ± 0.09  | 0.99 ± 0.04  |    | 1.08 ± 0.04  | 0.99 ± 0.05  | *  | 0.88 ± 0.04  | 0.97 ± 0.06  |
| <i>e2f1</i>     | 1.11 ± 0.03 | 0.99 ± 0.02 |    | 1.11 ± 0.02  | 1.00 ± 0.02  | †  | 1.17 ± 0.02  | 0.94 ± 0.02  | *  | 0.96 ± 0.02  | 0.90 ± 0.02  |
| <i>eaf2</i>     | 1.00 ± 0.07 | 1.01 ± 0.05 |    | 1.13 ± 0.12  | 1.06 ± 0.12  |    | 0.98 ± 0.10  | 0.99 ± 0.12  | †  | 1.06 ± 0.06  | 0.81 ± 0.06† |
| <i>ebag9</i>    | 1.07 ± 0.03 | 1.03 ± 0.04 |    | 1.04 ± 0.04  | 1.02 ± 0.04  | *  | 0.96 ± 0.03  | 0.97 ± 0.04  |    | 1.04 ± 0.05  | 1.05 ± 0.05  |
| <i>egln3</i>    | 1.33 ± 0.11 | 1.24 ± 0.05 | *  | 0.71 ± 0.02  | 0.78 ± 0.03  | *  | 0.91 ± 0.02  | 0.79 ± 0.04  | *† | 1.27 ± 0.04  | 1.89 ± 0.05† |
| <i>elk1</i>     | 0.95 ± 0.03 | 1.08 ± 0.09 |    | 1.12 ± 0.12  | 1.07 ± 0.10  | †  | 1.05 ± 0.06  | 0.90 ± 0.07  | †  | 1.21 ± 0.09† | 0.97 ± 0.11  |
| <i>elmo1</i>    | 0.94 ± 0.07 | 1.07 ± 0.10 |    | 1.08 ± 0.11  | 0.95 ± 0.08  |    | 0.90 ± 0.06  | 1.11 ± 0.10  |    | 0.87 ± 0.06  | 1.05 ± 0.07  |
| <i>espl1</i>    | 1.36 ± 0.01 | 0.91 ± 0.01 | *  | 1.22 ± 0.03  | 0.83 ± 0.01  | *† | 1.25 ± 0.01† | 0.76 ± 0.01† | *  | 1.27 ± 0.02  | 0.85 ± 0.01  |
| <i>esrrbl1</i>  | 0.99 ± 0.01 | 1.04 ± 0.03 | *  | 0.94 ± 0.02  | 1.01 ± 0.01  |    | 0.97 ± 0.02  | 1.04 ± 0.03  |    | 1.02 ± 0.02  | 1.02 ± 0.02  |
| <i>ets1</i>     | 1.17 ± 0.11 | 1.03 ± 0.07 | *  | 0.92 ± 0.09  | 0.92 ± 0.06  |    | 1.06 ± 0.12  | 0.97 ± 0.06  |    | 0.96 ± 0.13  | 0.96 ± 0.06  |
| <i>fadd</i>     | 1.30 ± 0.02 | 0.87 ± 0.03 |    | 1.28 ± 0.05  | 0.81 ± 0.03  | †  | 1.37 ± 0.03  | 0.72 ± 0.03† |    | 1.33 ± 0.07  | 0.83 ± 0.02  |
| <i>faj1</i>     | 1.06 ± 0.01 | 0.90 ± 0.01 | *† | 1.07 ± 0.01  | 0.96 ± 0.01† | *  | 1.07 ± 0.02  | 0.96 ± 0.02  |    | 1.04 ± 0.02  | 0.91 ± 0.02  |
| <i>faim</i>     | 1.00 ± 0.02 | 1.04 ± 0.04 |    | 0.99 ± 0.01  | 1.12 ± 0.03  |    | 0.99 ± 0.02  | 1.08 ± 0.02  | *  | 0.90 ± 0.03  | 1.00 ± 0.02  |
| <i>faim2</i>    | 1.00 ± 0.11 | 0.93 ± 0.12 |    | 0.94 ± 0.07  | 0.83 ± 0.03  | *  | 1.11 ± 0.12  | 1.25 ± 0.11  |    | 1.18 ± 0.16  | 0.96 ± 0.11  |
| <i>fem1b</i>    | 1.06 ± 0.01 | 0.89 ± 0.03 |    | 1.03 ± 0.02  | 0.86 ± 0.02  | *  | 1.11 ± 0.02  | 1.01 ± 0.01  | *  | 1.14 ± 0.02  | 0.94 ± 0.02  |
| <i>foxl2</i>    | 0.94 ± 0.06 | 1.07 ± 0.10 |    | 1.02 ± 0.11  | 0.90 ± 0.07  |    | 0.90 ± 0.07  | 1.09 ± 0.12  |    | 0.92 ± 0.09  | 0.91 ± 0.04  |
| <i>foxo3</i>    | 0.83 ± 0.04 | 0.94 ± 0.06 |    | 0.90 ± 0.06  | 1.06 ± 0.07  | *  | 1.00 ± 0.06  | 1.01 ± 0.04  | *  | 1.08 ± 0.04  | 1.13 ± 0.04  |
| <i>frag1</i>    | 0.97 ± 0.02 | 0.98 ± 0.04 |    | 0.98 ± 0.02  | 1.01 ± 0.01  |    | 0.97 ± 0.01  | 1.00 ± 0.03  |    | 0.96 ± 0.01  | 1.04 ± 0.03  |
| <i>fxr1h</i>    | 1.01 ± 0.04 | 0.96 ± 0.08 |    | 0.98 ± 0.04  | 0.99 ± 0.04  | †  | 0.97 ± 0.05  | 1.11 ± 0.05  |    | 1.08 ± 0.03  | 1.07 ± 0.06  |
| <i>g6pdx</i>    | 0.99 ± 0.01 | 0.96 ± 0.01 | *  | 1.07 ± 0.01  | 1.06 ± 0.01  | *† | 0.99 ± 0.01  | 1.00 ± 0.01† | *† | 1.01 ± 0.01† | 1.05 ± 0.01† |
| <i>gadd45b</i>  | 1.09 ± 0.03 | 0.96 ± 0.05 |    | 1.05 ± 0.04  | 0.92 ± 0.04  |    | 1.12 ± 0.03  | 0.98 ± 0.05  | *  | 1.00 ± 0.05  | 0.89 ± 0.03  |
| <i>gadd45g</i>  | 0.84 ± 0.01 | 1.11 ± 0.02 | *  | 0.95 ± 0.03  | 1.24 ± 0.01  | *† | 0.93 ± 0.01† | 1.38 ± 0.02† | *  | 0.80 ± 0.01  | 1.04 ± 0.01  |
| <i>gapd</i>     | 0.97 ± 0.01 | 1.04 ± 0.02 | *  | 0.95 ± 0.01  | 1.01 ± 0.02  |    | 0.97 ± 0.02  | 1.03 ± 0.03  | *† | 1.09 ± 0.05  | 1.34 ± 0.02† |
| <i>gch</i>      | 1.00 ± 0.01 | 0.83 ± 0.01 | *† | 1.08 ± 0.01† | 0.83 ± 0.01  |    | 1.00 ± 0.01  | 0.82 ± 0.01  | *† | 1.11 ± 0.04† | 1.08 ± 0.01† |
| <i>gdf5</i>     | 0.99 ± 0.04 | 1.02 ± 0.05 | *  | 1.08 ± 0.04  | 1.23 ± 0.09  |    | 0.93 ± 0.06  | 1.05 ± 0.05  | †  | 0.83 ± 0.04† | 1.04 ± 0.06  |
| <i>gjb6</i>     | 1.08 ± 0.10 | 1.01 ± 0.06 |    | 1.04 ± 0.08  | 0.87 ± 0.06  |    | 1.12 ± 0.10  | 1.04 ± 0.06  |    | 1.02 ± 0.10  | 0.89 ± 0.06  |
| <i>gml</i>      | 0.92 ± 0.14 | 1.04 ± 0.10 |    | 1.10 ± 0.11  | 0.88 ± 0.10  |    | 1.09 ± 0.16  | 1.09 ± 0.11  |    | 1.04 ± 0.12  | 0.98 ± 0.06  |
| <i>gnaq</i>     | 0.99 ± 0.03 | 0.95 ± 0.03 | *  | 0.99 ± 0.05  | 1.05 ± 0.03  |    | 0.96 ± 0.04  | 0.99 ± 0.05  | †  | 0.97 ± 0.06  | 1.13 ± 0.05† |
| <i>gnrh1</i>    | 0.97 ± 0.03 | 0.99 ± 0.04 |    | 0.97 ± 0.04  | 1.06 ± 0.03  | *  | 1.12 ± 0.03  | 1.10 ± 0.03  |    | 0.99 ± 0.02  | 0.98 ± 0.02  |
| <i>gpx1</i>     | 0.93 ± 0.01 | 1.12 ± 0.02 | *  | 0.98 ± 0.01  | 1.14 ± 0.01  | *† | 0.92 ± 0.01  | 1.07 ± 0.01† | *† | 0.92 ± 0.01  | 1.05 ± 0.02† |
| <i>gsk3b</i>    | 0.96 ± 0.03 | 1.04 ± 0.06 | *  | 0.91 ± 0.04  | 0.91 ± 0.03  |    | 0.96 ± 0.03  | 1.00 ± 0.03  | *  | 1.12 ± 0.05  | 1.15 ± 0.03  |
| <i>gspt1</i>    | 1.06 ± 0.03 | 0.94 ± 0.06 |    | 0.99 ± 0.03  | 0.93 ± 0.03  |    | 1.01 ± 0.03  | 0.99 ± 0.04  |    | 1.06 ± 0.04  | 0.96 ± 0.04  |
| <i>gulp1</i>    | 0.89 ± 0.11 | 1.12 ± 0.10 |    | 0.98 ± 0.13  | 0.95 ± 0.08  |    | 0.93 ± 0.06  | 1.15 ± 0.10  |    | 0.87 ± 0.07  | 1.05 ± 0.07  |
| <i>gzma</i>     | 1.06 ± 0.08 | 1.00 ± 0.04 |    | 0.92 ± 0.07  | 0.96 ± 0.07  |    | 0.96 ± 0.10  | 1.13 ± 0.15  |    | 1.34 ± 0.18  | 0.93 ± 0.10  |
| <i>gzmb</i>     | 1.11 ± 0.16 | 0.99 ± 0.07 |    | 1.07 ± 0.12  | 0.81 ± 0.06  |    | 1.04 ± 0.06  | 1.15 ± 0.09  |    | 1.23 ± 0.28  | 0.90 ± 0.10  |
| <i>hdh</i>      | 1.04 ± 0.04 | 0.93 ± 0.05 |    | 1.06 ± 0.03  | 1.00 ± 0.04  |    | 1.07 ± 0.03  | 1.04 ± 0.05  |    | 0.98 ± 0.03  | 0.99 ± 0.05  |
| <i>hh-muc</i>   | 1.05 ± 0.18 | 1.07 ± 0.13 |    | 0.92 ± 0.13  | 0.90 ± 0.08  |    | 0.96 ± 0.12  | 1.42 ± 0.18  |    | 0.85 ± 0.07  | 0.92 ± 0.08  |
| <i>hip1</i>     | 0.96 ± 0.04 | 1.08 ± 0.04 |    | 0.95 ± 0.03  | 1.11 ± 0.03  |    | 0.99 ± 0.04  | 1.04 ± 0.04  | *  | 0.85 ± 0.03  | 0.98 ± 0.04  |
| <i>hipk1</i>    | 1.08 ± 0.03 | 1.02 ± 0.04 |    | 1.03 ± 0.05  | 0.99 ± 0.03  | *  | 0.96 ± 0.04  | 0.95 ± 0.04  | *  | 0.95 ± 0.04  | 0.94 ± 0.03  |
| <i>hipk2</i>    | 1.12 ± 0.04 | 0.89 ± 0.05 |    | 1.08 ± 0.04  | 0.90 ± 0.03  |    | 1.05 ± 0.04  | 0.95 ± 0.03  |    | 1.08 ± 0.06  | 0.96 ± 0.03  |

Supplemental Table 2 (continued)

|                  |             |             |   |              |              |    |              |              |    |              |              |
|------------------|-------------|-------------|---|--------------|--------------|----|--------------|--------------|----|--------------|--------------|
| <i>hmox1</i>     | 1.04 ± 0.02 | 0.72 ± 0.02 | † | 1.00 ± 0.02  | 0.76 ± 0.01  | †  | 1.03 ± 0.01  | 0.78 ± 0.01† | *† | 1.33 ± 0.02† | 1.30 ± 0.02† |
| <i>hrpap20</i>   | 1.06 ± 0.01 | 0.96 ± 0.02 |   | 1.10 ± 0.02  | 0.95 ± 0.01  |    | 1.09 ± 0.01  | 0.94 ± 0.01  |    | 1.08 ± 0.03  | 0.94 ± 0.01  |
| <i>hspa1a</i>    | 1.03 ± 0.02 | 1.10 ± 0.03 | * | 0.96 ± 0.02  | 0.96 ± 0.02  | *  | 0.93 ± 0.03  | 0.95 ± 0.02  |    | 1.10 ± 0.05  | 1.05 ± 0.02  |
| <i>hspa9a</i>    | 1.01 ± 0.02 | 1.03 ± 0.03 |   | 1.02 ± 0.02  | 1.06 ± 0.03  | *† | 1.02 ± 0.02  | 1.11 ± 0.02† | *  | 0.96 ± 0.02  | 0.96 ± 0.01  |
| <i>iapp</i>      | 0.98 ± 0.07 | 1.10 ± 0.09 |   | 1.21 ± 0.14  | 1.01 ± 0.10  |    | 0.93 ± 0.06  | 1.12 ± 0.10  |    | 0.82 ± 0.08  | 1.07 ± 0.07  |
| <i>igf1</i>      | 1.06 ± 0.06 | 0.94 ± 0.04 | † | 0.96 ± 0.06  | 1.01 ± 0.02  | †  | 0.95 ± 0.03  | 1.01 ± 0.04  |    | 1.02 ± 0.02  | 1.01 ± 0.01  |
| <i>igfbp3</i>    | 1.00 ± 0.07 | 0.99 ± 0.06 |   | 0.98 ± 0.08  | 1.01 ± 0.08  |    | 1.17 ± 0.10  | 1.07 ± 0.06  |    | 1.08 ± 0.11  | 0.94 ± 0.11  |
| <i>il10</i>      | 1.22 ± 0.12 | 0.97 ± 0.07 |   | 1.09 ± 0.16  | 0.98 ± 0.08  | †  | 0.94 ± 0.08  | 1.04 ± 0.04  | *† | 0.76 ± 0.09† | 1.00 ± 0.09  |
| <i>il18</i>      | 1.04 ± 0.02 | 1.12 ± 0.04 |   | 1.04 ± 0.02  | 1.04 ± 0.01  | *† | 1.04 ± 0.02  | 0.93 ± 0.01† | *† | 0.95 ± 0.01  | 0.86 ± 0.02† |
| <i>inha</i>      | 0.94 ± 0.02 | 1.06 ± 0.02 |   | 0.95 ± 0.02  | 1.01 ± 0.01  |    | 0.97 ± 0.02  | 1.04 ± 0.02  |    | 0.98 ± 0.01  | 1.04 ± 0.02  |
| <i>inpp5d</i>    | 0.99 ± 0.03 | 0.92 ± 0.03 |   | 1.04 ± 0.04  | 0.92 ± 0.04  | †  | 0.89 ± 0.03  | 1.00 ± 0.05  | *  | 1.23 ± 0.08  | 1.01 ± 0.03  |
| <i>ins2</i>      | 1.12 ± 0.12 | 1.05 ± 0.06 |   | 1.08 ± 0.10  | 1.06 ± 0.09  |    | 1.11 ± 0.12  | 1.04 ± 0.07  |    | 0.93 ± 0.08  | 1.00 ± 0.09  |
| <i>irak3</i>     | 1.01 ± 0.19 | 0.92 ± 0.05 |   | 0.88 ± 0.08  | 0.89 ± 0.12  | *  | 1.33 ± 0.19  | 1.16 ± 0.08  |    | 0.95 ± 0.11  | 0.86 ± 0.06  |
| <i>itm2b</i>     | 0.94 ± 0.01 | 1.14 ± 0.04 |   | 0.92 ± 0.01  | 1.14 ± 0.02  | †  | 0.89 ± 0.01  | 1.25 ± 0.02† | *  | 0.93 ± 0.02  | 1.06 ± 0.02  |
| <i>jak2</i>      | 0.97 ± 0.02 | 0.97 ± 0.02 |   | 0.99 ± 0.02  | 0.95 ± 0.02  |    | 0.97 ± 0.02  | 1.00 ± 0.01  | *  | 1.04 ± 0.01  | 0.98 ± 0.02  |
| <i>lcn2</i>      | 0.87 ± 0.04 | 1.13 ± 0.03 |   | 0.84 ± 0.07  | 1.09 ± 0.03  | *  | 0.89 ± 0.03  | 1.27 ± 0.06  | †  | 1.01 ± 0.04† | 0.87 ± 0.05† |
| <i>lgals12</i>   | 0.91 ± 0.09 | 1.05 ± 0.09 |   | 1.08 ± 0.09  | 0.95 ± 0.08  | *  | 1.08 ± 0.11  | 1.20 ± 0.09  |    | 0.87 ± 0.07  | 1.04 ± 0.07  |
| <i>lgals7</i>    | 0.96 ± 0.06 | 1.02 ± 0.07 |   | 0.92 ± 0.12  | 0.92 ± 0.07  | †  | 1.17 ± 0.06† | 0.94 ± 0.05  | †  | 1.08 ± 0.10  | 0.80 ± 0.06† |
| <i>lhx4</i>      | 1.06 ± 0.06 | 0.98 ± 0.11 |   | 0.98 ± 0.09  | 0.85 ± 0.05  |    | 0.98 ± 0.10  | 1.06 ± 0.12  |    | 0.96 ± 0.06  | 1.11 ± 0.08  |
| <i>litaf</i>     | 1.03 ± 0.02 | 1.11 ± 0.04 | * | 0.93 ± 0.02  | 1.02 ± 0.01  | *  | 0.98 ± 0.01  | 1.03 ± 0.01  | *† | 1.00 ± 0.02  | 0.91 ± 0.01† |
| <i>loc170824</i> | 0.88 ± 0.08 | 0.99 ± 0.07 | * | 0.99 ± 0.07  | 1.27 ± 0.10  | *  | 0.98 ± 0.06  | 1.15 ± 0.09  |    | 0.86 ± 0.07  | 1.10 ± 0.08  |
| <i>loc246143</i> | 0.94 ± 0.01 | 0.99 ± 0.03 | * | 1.00 ± 0.01  | 1.14 ± 0.02  | *  | 1.01 ± 0.02  | 1.07 ± 0.02  | †  | 0.90 ± 0.01  | 1.03 ± 0.01  |
| <i>loc292624</i> | 1.03 ± 0.02 | 0.97 ± 0.04 |   | 1.00 ± 0.02  | 0.99 ± 0.02  |    | 1.04 ± 0.02  | 1.00 ± 0.02  |    | 0.99 ± 0.02  | 0.96 ± 0.03  |
| <i>loc362704</i> | 0.98 ± 0.02 | 0.98 ± 0.03 | † | 0.96 ± 0.02  | 1.09 ± 0.02† | *† | 0.99 ± 0.02  | 1.10 ± 0.02† |    | 0.98 ± 0.02  | 0.99 ± 0.03  |
| <i>loc500348</i> | 0.76 ± 0.06 | 1.04 ± 0.05 |   | 0.72 ± 0.05  | 1.06 ± 0.07  | *  | 0.97 ± 0.06  | 1.31 ± 0.10  |    | 0.77 ± 0.06  | 1.11 ± 0.09  |
| <i>loc64171</i>  | 1.04 ± 0.02 | 0.99 ± 0.02 |   | 1.01 ± 0.02  | 0.98 ± 0.01  | *  | 1.08 ± 0.02  | 1.02 ± 0.01  | *  | 1.00 ± 0.03  | 0.94 ± 0.01  |
| <i>loc652955</i> | 1.01 ± 0.02 | 0.88 ± 0.02 | * | 1.09 ± 0.01  | 0.95 ± 0.02  | *  | 1.07 ± 0.02  | 0.96 ± 0.01  | *† | 1.02 ± 0.02  | 1.00 ± 0.02† |
| <i>lrdd</i>      | 1.04 ± 0.05 | 0.92 ± 0.04 | † | 0.99 ± 0.04  | 1.10 ± 0.04† | *  | 1.12 ± 0.06  | 1.03 ± 0.04  | †  | 0.92 ± 0.04  | 0.99 ± 0.04  |
| <i>lsp1</i>      | 0.83 ± 0.04 | 1.28 ± 0.05 | * | 0.70 ± 0.04  | 1.15 ± 0.02  | *  | 0.78 ± 0.04  | 1.06 ± 0.03  | *† | 0.82 ± 0.02  | 1.04 ± 0.02† |
| <i>ly86</i>      | 0.90 ± 0.09 | 1.07 ± 0.10 | † | 1.21 ± 0.12  | 0.96 ± 0.08  |    | 1.03 ± 0.11  | 1.19 ± 0.13  |    | 0.91 ± 0.06  | 1.05 ± 0.07  |
| <i>madd</i>      | 0.98 ± 0.04 | 1.02 ± 0.02 | † | 0.89 ± 0.03  | 1.06 ± 0.03  |    | 1.00 ± 0.03  | 1.07 ± 0.03  | *  | 0.88 ± 0.04  | 0.99 ± 0.04  |
| <i>mageh1</i>    | 1.10 ± 0.03 | 1.05 ± 0.10 | * | 0.93 ± 0.03  | 1.00 ± 0.04  | *  | 0.96 ± 0.03  | 0.93 ± 0.02  |    | 1.02 ± 0.08  | 1.10 ± 0.04  |
| <i>malt1</i>     | 0.94 ± 0.03 | 1.01 ± 0.03 |   | 0.99 ± 0.05  | 1.05 ± 0.03  |    | 0.97 ± 0.03  | 1.04 ± 0.04  |    | 1.02 ± 0.03  | 0.97 ± 0.03  |
| <i>map3k10</i>   | 1.07 ± 0.07 | 0.99 ± 0.05 | † | 0.92 ± 0.07  | 1.08 ± 0.04  | †  | 0.89 ± 0.04† | 1.01 ± 0.03  | †  | 0.97 ± 0.04  | 1.19 ± 0.05† |
| <i>map3k6</i>    | 0.98 ± 0.01 | 0.91 ± 0.02 | * | 1.03 ± 0.01  | 0.96 ± 0.01  | *  | 1.06 ± 0.02  | 1.03 ± 0.01  |    | 1.00 ± 0.02  | 0.87 ± 0.02  |
| <i>map3k7</i>    | 0.93 ± 0.05 | 0.94 ± 0.09 |   | 1.01 ± 0.03  | 0.96 ± 0.04  |    | 0.99 ± 0.09  | 0.94 ± 0.05  | *  | 1.29 ± 0.10  | 1.15 ± 0.10  |
| <i>mapk8ip</i>   | 0.97 ± 0.03 | 0.93 ± 0.04 | † | 0.91 ± 0.03  | 1.09 ± 0.02† | *† | 0.97 ± 0.03  | 1.08 ± 0.02† | †  | 0.87 ± 0.03  | 1.06 ± 0.03  |
| <i>mapk8ip2</i>  | 1.04 ± 0.03 | 0.96 ± 0.04 |   | 1.00 ± 0.04  | 1.04 ± 0.03  |    | 1.05 ± 0.04  | 1.00 ± 0.04  |    | 0.99 ± 0.03  | 0.98 ± 0.05  |
| <i>mcl1</i>      | 0.98 ± 0.01 | 0.92 ± 0.02 | * | 1.07 ± 0.03  | 0.97 ± 0.01  |    | 0.99 ± 0.02  | 0.99 ± 0.02  | *  | 1.08 ± 0.01  | 0.99 ± 0.01  |
| <i>mdm4</i>      | 1.05 ± 0.02 | 1.00 ± 0.02 | † | 1.12 ± 0.03  | 0.98 ± 0.02  | *  | 1.00 ± 0.03  | 0.96 ± 0.03  | †  | 1.10 ± 0.04  | 0.93 ± 0.03  |
| <i>mdn1</i>      | 1.00 ± 0.05 | 1.00 ± 0.08 |   | 0.96 ± 0.05  | 0.93 ± 0.05  |    | 0.96 ± 0.04  | 1.06 ± 0.08  |    | 1.08 ± 0.06  | 1.02 ± 0.05  |
| <i>mgc72992</i>  | 0.99 ± 0.02 | 1.00 ± 0.04 |   | 0.99 ± 0.02  | 0.99 ± 0.02  |    | 0.99 ± 0.03  | 1.00 ± 0.02  |    | 0.98 ± 0.03  | 1.01 ± 0.03  |
| <i>mgc94574</i>  | 0.90 ± 0.01 | 1.16 ± 0.02 |   | 0.90 ± 0.01  | 1.19 ± 0.02  | *  | 0.92 ± 0.01  | 1.25 ± 0.02  | †  | 0.93 ± 0.01  | 1.11 ± 0.02  |
| <i>mitf</i>      | 1.00 ± 0.08 | 1.03 ± 0.12 |   | 1.10 ± 0.11  | 0.95 ± 0.10  |    | 1.33 ± 0.22  | 1.04 ± 0.11  |    | 0.87 ± 0.07  | 1.09 ± 0.08  |
| <i>mk11</i>      | 1.04 ± 0.07 | 0.88 ± 0.08 | † | 0.97 ± 0.11  | 1.16 ± 0.06† | *  | 1.08 ± 0.06  | 1.16 ± 0.09  |    | 1.03 ± 0.09  | 0.84 ± 0.04  |
| <i>mth1</i>      | 1.12 ± 0.04 | 0.93 ± 0.04 |   | 1.16 ± 0.05  | 0.94 ± 0.04  |    | 1.16 ± 0.05  | 0.90 ± 0.04  | *  | 1.05 ± 0.03  | 0.84 ± 0.04  |
| <i>mmt</i>       | 1.02 ± 0.04 | 0.97 ± 0.04 |   | 0.98 ± 0.03  | 1.03 ± 0.02  |    | 1.02 ± 0.01  | 1.06 ± 0.04  |    | 0.97 ± 0.03  | 0.99 ± 0.03  |
| <i>moap1</i>     | 0.97 ± 0.01 | 1.09 ± 0.01 | * | 0.96 ± 0.01  | 1.05 ± 0.01  | *† | 0.96 ± 0.01  | 1.02 ± 0.01† |    | 0.97 ± 0.02  | 1.06 ± 0.02  |
| <i>mrps30</i>    | 0.97 ± 0.01 | 1.00 ± 0.01 | * | 1.01 ± 0.01  | 1.04 ± 0.01  |    | 0.98 ± 0.01  | 1.02 ± 0.01  |    | 0.97 ± 0.01  | 1.01 ± 0.02  |
| <i>mtac2d1</i>   | 0.95 ± 0.09 | 1.05 ± 0.09 |   | 1.17 ± 0.14  | 0.94 ± 0.08  |    | 1.00 ± 0.10  | 1.08 ± 0.10  |    | 0.90 ± 0.06  | 1.03 ± 0.07  |
| <i>mtch1</i>     | 0.97 ± 0.01 | 1.07 ± 0.02 | † | 0.92 ± 0.02† | 1.11 ± 0.01  | *  | 0.98 ± 0.01  | 1.12 ± 0.01  | *  | 0.93 ± 0.02  | 1.01 ± 0.03  |
| <i>mybl2</i>     | 1.19 ± 0.03 | 0.84 ± 0.02 |   | 1.15 ± 0.03  | 0.89 ± 0.02  |    | 1.21 ± 0.03  | 0.82 ± 0.02  | †  | 1.12 ± 0.04  | 0.90 ± 0.03  |
| <i>myc</i>       | 0.97 ± 0.03 | 0.55 ± 0.01 | * | 1.23 ± 0.04  | 0.70 ± 0.02  | *† | 1.17 ± 0.05† | 1.28 ± 0.05† | *† | 1.13 ± 0.04† | 0.73 ± 0.02† |
| <i>mycs</i>      | 1.19 ± 0.13 | 1.02 ± 0.06 |   | 1.00 ± 0.14  | 0.98 ± 0.08  |    | 1.05 ± 0.06  | 1.05 ± 0.13  | *  | 1.12 ± 0.11  | 0.77 ± 0.08  |
| <i>nalp1</i>     | 1.03 ± 0.04 | 0.90 ± 0.05 | * | 1.05 ± 0.05  | 1.02 ± 0.03  |    | 0.98 ± 0.04  | 0.96 ± 0.04  |    | 0.96 ± 0.02  | 0.85 ± 0.04  |
| <i>nalp10</i>    | 0.86 ± 0.07 | 1.07 ± 0.10 |   | 1.04 ± 0.10  | 0.95 ± 0.08  |    | 1.02 ± 0.10  | 1.10 ± 0.10  |    | 0.87 ± 0.06  | 1.05 ± 0.07  |
| <i>nalp14</i>    | 0.94 ± 0.12 | 1.09 ± 0.10 |   | 1.09 ± 0.11  | 0.98 ± 0.09  |    | 0.92 ± 0.07  | 1.13 ± 0.10  |    | 0.98 ± 0.09  | 1.05 ± 0.06  |
| <i>nfkb1</i>     | 1.03 ± 0.02 | 0.97 ± 0.02 |   | 1.00 ± 0.02  | 0.94 ± 0.02  | †  | 0.97 ± 0.02  | 1.03 ± 0.03  | *  | 1.09 ± 0.01  | 1.01 ± 0.02  |

Supplemental Table 2 (continued)

|                   |             |             |    |             |              |    |              |              |    |              |              |
|-------------------|-------------|-------------|----|-------------|--------------|----|--------------|--------------|----|--------------|--------------|
| <i>ngfr</i>       | 1.00 ± 0.02 | 1.01 ± 0.02 | †  | 0.95 ± 0.01 | 1.05 ± 0.02  |    | 1.03 ± 0.03  | 1.04 ± 0.03  |    | 0.98 ± 0.02  | 1.00 ± 0.03  |
| <i>ngfrap1</i>    | 0.96 ± 0.01 | 1.09 ± 0.02 | *  | 1.05 ± 0.01 | 1.20 ± 0.01  | †  | 0.96 ± 0.01  | 1.02 ± 0.01† | *† | 0.83 ± 0.01† | 0.79 ± 0.01† |
| <i>nme3</i>       | 1.01 ± 0.03 | 1.05 ± 0.02 | *  | 0.98 ± 0.03 | 0.98 ± 0.02  |    | 0.97 ± 0.03  | 1.03 ± 0.03  | *  | 0.97 ± 0.03  | 0.95 ± 0.02  |
| <i>nol3</i>       | 0.97 ± 0.02 | 1.08 ± 0.05 | *  | 1.05 ± 0.03 | 1.16 ± 0.03  |    | 0.96 ± 0.03  | 1.03 ± 0.02  | *  | 0.91 ± 0.03  | 0.97 ± 0.03  |
| <i>notch1</i>     | 1.27 ± 0.09 | 1.00 ± 0.12 |    | 1.11 ± 0.13 | 0.91 ± 0.10  | †  | 0.84 ± 0.17† | 1.11 ± 0.13  | *  | 0.83 ± 0.12  | 0.84 ± 0.08  |
| <i>notch2</i>     | 0.90 ± 0.07 | 0.89 ± 0.07 |    | 1.05 ± 0.14 | 0.91 ± 0.06  | *  | 1.18 ± 0.16  | 1.01 ± 0.06  |    | 1.15 ± 0.13  | 0.84 ± 0.12  |
| <i>nsmaf</i>      | 1.09 ± 0.03 | 0.83 ± 0.05 |    | 1.11 ± 0.02 | 0.91 ± 0.03  | *† | 1.09 ± 0.05  | 0.99 ± 0.04† |    | 1.10 ± 0.02  | 0.91 ± 0.03  |
| <i>ntn1</i>       | 1.20 ± 0.15 | 1.27 ± 0.09 | *  | 0.86 ± 0.09 | 0.96 ± 0.07  | *  | 0.89 ± 0.12  | 0.96 ± 0.07  | *  | 0.77 ± 0.03  | 0.95 ± 0.09  |
| <i>opal</i>       | 1.01 ± 0.01 | 0.92 ± 0.02 |    | 1.03 ± 0.02 | 0.96 ± 0.01  | *  | 1.08 ± 0.02  | 1.00 ± 0.02  |    | 1.00 ± 0.04  | 1.00 ± 0.01  |
| <i>osi</i>        | 1.16 ± 0.11 | 1.30 ± 0.18 | *  | 0.92 ± 0.08 | 1.01 ± 0.12  | *  | 0.98 ± 0.10  | 0.94 ± 0.10  | *  | 0.90 ± 0.09  | 0.88 ± 0.08  |
| <i>p2rx1</i>      | 0.95 ± 0.11 | 1.09 ± 0.13 |    | 0.87 ± 0.15 | 0.83 ± 0.10  |    | 1.15 ± 0.18  | 1.09 ± 0.09  |    | 0.76 ± 0.09  | 0.98 ± 0.05  |
| <i>pafah2</i>     | 0.95 ± 0.06 | 1.11 ± 0.06 |    | 1.08 ± 0.06 | 1.04 ± 0.05  |    | 1.00 ± 0.03  | 1.12 ± 0.09  |    | 0.97 ± 0.05  | 0.97 ± 0.09  |
| <i>pairbp1</i>    | 1.09 ± 0.01 | 0.94 ± 0.01 |    | 1.06 ± 0.01 | 0.96 ± 0.01  |    | 1.08 ± 0.02  | 0.92 ± 0.02  |    | 1.06 ± 0.02  | 0.96 ± 0.01  |
| <i>pak7</i>       | 0.98 ± 0.09 | 1.09 ± 0.10 |    | 1.03 ± 0.11 | 0.98 ± 0.08  |    | 0.88 ± 0.05  | 1.12 ± 0.10  |    | 0.98 ± 0.06  | 1.01 ± 0.06  |
| <i>pawr</i>       | 0.93 ± 0.10 | 1.02 ± 0.09 |    | 1.04 ± 0.14 | 0.91 ± 0.07  |    | 1.02 ± 0.09  | 1.09 ± 0.12  |    | 0.95 ± 0.18  | 0.98 ± 0.05  |
| <i>pdcd1</i>      | 1.20 ± 0.17 | 0.97 ± 0.08 | †  | 0.87 ± 0.12 | 1.25 ± 0.14  |    | 0.93 ± 0.17  | 0.90 ± 0.12  |    | 0.86 ± 0.14  | 0.99 ± 0.19  |
| <i>pdcd11</i>     | 1.00 ± 0.02 | 1.01 ± 0.02 |    | 0.98 ± 0.01 | 1.02 ± 0.01  |    | 0.99 ± 0.01  | 1.04 ± 0.02  |    | 1.00 ± 0.01  | 0.97 ± 0.01  |
| <i>pdcd2</i>      | 0.99 ± 0.01 | 0.96 ± 0.01 | *  | 1.02 ± 0.01 | 1.00 ± 0.01  | *  | 1.03 ± 0.01  | 1.04 ± 0.01  |    | 1.00 ± 0.01  | 0.99 ± 0.01  |
| <i>pdcd5</i>      | 0.97 ± 0.01 | 1.03 ± 0.01 |    | 0.99 ± 0.01 | 1.05 ± 0.01  |    | 0.99 ± 0.01  | 1.01 ± 0.01  | *  | 0.94 ± 0.01  | 1.01 ± 0.02  |
| <i>pdcd6</i>      | 0.97 ± 0.01 | 0.97 ± 0.01 | *  | 0.99 ± 0.01 | 1.00 ± 0.01  | *† | 1.00 ± 0.01  | 1.06 ± 0.01† | *  | 1.00 ± 0.01  | 1.03 ± 0.01  |
| <i>pdcd6ip</i>    | 1.04 ± 0.02 | 0.95 ± 0.04 |    | 1.07 ± 0.02 | 0.98 ± 0.03  |    | 1.04 ± 0.04  | 0.99 ± 0.03  |    | 0.96 ± 0.02  | 0.94 ± 0.03  |
| <i>pdcd7</i>      | 0.98 ± 0.01 | 1.03 ± 0.01 |    | 0.97 ± 0.01 | 1.02 ± 0.01  |    | 0.97 ± 0.01  | 0.99 ± 0.02  | *  | 1.03 ± 0.01  | 1.06 ± 0.01  |
| <i>pdcd8</i>      | 0.98 ± 0.01 | 1.06 ± 0.02 | *  | 1.00 ± 0.01 | 1.13 ± 0.02  |    | 0.98 ± 0.01  | 1.07 ± 0.01  | *  | 0.92 ± 0.01  | 0.95 ± 0.01  |
| <i>pea-15</i>     | 1.05 ± 0.04 | 0.90 ± 0.03 | †  | 1.05 ± 0.05 | 1.05 ± 0.03† |    | 1.10 ± 0.04  | 0.94 ± 0.03  | †  | 0.95 ± 0.04  | 1.01 ± 0.04  |
| <i>perp</i>       | 0.96 ± 0.07 | 1.13 ± 0.06 | †  | 1.08 ± 0.11 | 0.90 ± 0.07† |    | 0.90 ± 0.06  | 1.11 ± 0.10  |    | 0.88 ± 0.06  | 1.06 ± 0.07  |
| <i>pglyrp1</i>    | 1.03 ± 0.06 | 1.06 ± 0.05 |    | 0.99 ± 0.03 | 1.02 ± 0.04  |    | 0.95 ± 0.08  | 0.99 ± 0.05  |    | 0.95 ± 0.03  | 1.01 ± 0.06  |
| <i>phldal</i>     | 0.95 ± 0.06 | 1.08 ± 0.05 |    | 0.94 ± 0.03 | 0.93 ± 0.05  | *  | 1.00 ± 0.04  | 1.25 ± 0.05  |    | 0.97 ± 0.04  | 1.06 ± 0.05  |
| <i>pigt</i>       | 0.95 ± 0.01 | 1.09 ± 0.02 |    | 0.93 ± 0.01 | 1.07 ± 0.01  |    | 0.96 ± 0.02  | 1.07 ± 0.02  |    | 0.96 ± 0.03  | 1.04 ± 0.01  |
| <i>pik3cg</i>     | 0.98 ± 0.09 | 1.12 ± 0.08 |    | 1.14 ± 0.12 | 0.94 ± 0.08  |    | 1.10 ± 0.11  | 1.06 ± 0.10  |    | 0.91 ± 0.06  | 1.03 ± 0.07  |
| <i>pik3r1</i>     | 0.79 ± 0.07 | 1.16 ± 0.04 |    | 0.74 ± 0.06 | 1.33 ± 0.08  |    | 0.79 ± 0.06  | 1.51 ± 0.14  |    | 0.74 ± 0.06  | 1.14 ± 0.07  |
| <i>pik3r2</i>     | 0.99 ± 0.02 | 1.04 ± 0.02 |    | 0.95 ± 0.01 | 1.05 ± 0.02  |    | 1.01 ± 0.02  | 1.06 ± 0.01  | *  | 0.95 ± 0.02  | 0.98 ± 0.02  |
| <i>plagl1</i>     | 1.07 ± 0.09 | 1.08 ± 0.09 |    | 1.05 ± 0.10 | 1.03 ± 0.09  |    | 0.91 ± 0.06  | 1.12 ± 0.09  | *  | 0.81 ± 0.07  | 1.04 ± 0.07  |
| <i>plagl2</i>     | 0.99 ± 0.06 | 1.05 ± 0.11 |    | 1.08 ± 0.10 | 0.93 ± 0.07  | †  | 1.12 ± 0.07  | 0.79 ± 0.06† |    | 1.00 ± 0.06  | 0.90 ± 0.11  |
| <i>plekhe1</i>    | 1.02 ± 0.02 | 1.03 ± 0.04 |    | 0.99 ± 0.03 | 1.06 ± 0.03  |    | 1.03 ± 0.02  | 1.02 ± 0.02  |    | 0.98 ± 0.01  | 1.02 ± 0.02  |
| <i>plekhf1</i>    | 1.05 ± 0.04 | 0.82 ± 0.04 | *  | 1.06 ± 0.03 | 0.98 ± 0.05  | *  | 1.08 ± 0.05  | 0.93 ± 0.03  | *† | 1.05 ± 0.04  | 0.98 ± 0.04† |
| <i>plg</i>        | 1.05 ± 0.09 | 1.23 ± 0.11 |    | 1.12 ± 0.14 | 0.90 ± 0.10  |    | 0.97 ± 0.10  | 1.13 ± 0.17  | *  | 0.68 ± 0.11  | 0.84 ± 0.08  |
| <i>polb</i>       | 1.00 ± 0.01 | 1.03 ± 0.02 | *  | 0.94 ± 0.02 | 0.98 ± 0.02  |    | 1.00 ± 0.02  | 1.06 ± 0.02  |    | 1.01 ± 0.02  | 0.98 ± 0.01  |
| <i>pou4fl</i>     | 1.12 ± 0.08 | 0.92 ± 0.08 |    | 1.00 ± 0.10 | 0.88 ± 0.05  |    | 1.09 ± 0.04  | 0.86 ± 0.09  |    | 0.96 ± 0.06  | 0.90 ± 0.07  |
| <i>ppid</i>       | 0.93 ± 0.01 | 1.05 ± 0.03 |    | 0.97 ± 0.02 | 1.05 ± 0.01  |    | 0.96 ± 0.02  | 1.03 ± 0.01  |    | 0.95 ± 0.03  | 1.05 ± 0.01  |
| <i>ppm1f</i>      | 1.08 ± 0.06 | 0.92 ± 0.08 |    | 0.99 ± 0.07 | 0.93 ± 0.10  |    | 1.28 ± 0.07  | 0.96 ± 0.08  |    | 1.10 ± 0.07  | 0.95 ± 0.06  |
| <i>ppp1r13b</i>   | 1.13 ± 0.03 | 1.03 ± 0.02 | *  | 1.06 ± 0.03 | 0.95 ± 0.03  | *  | 1.10 ± 0.04  | 0.90 ± 0.02  | *  | 1.06 ± 0.04  | 0.85 ± 0.02  |
| <i>prdx2</i>      | 1.01 ± 0.01 | 1.05 ± 0.01 | *  | 0.97 ± 0.01 | 1.02 ± 0.01  |    | 1.00 ± 0.01  | 1.03 ± 0.02  | *† | 0.98 ± 0.01  | 0.97 ± 0.01† |
| <i>prkaal</i>     | 1.10 ± 0.05 | 0.90 ± 0.02 |    | 1.03 ± 0.03 | 0.90 ± 0.04  |    | 1.05 ± 0.03  | 0.90 ± 0.03  |    | 1.11 ± 0.07  | 0.96 ± 0.04  |
| <i>prkca</i>      | 1.03 ± 0.07 | 0.95 ± 0.09 |    | 1.07 ± 0.08 | 0.87 ± 0.06  |    | 0.97 ± 0.07  | 0.97 ± 0.08  |    | 1.07 ± 0.04  | 0.99 ± 0.06  |
| <i>prkcd</i>      | 0.93 ± 0.01 | 1.03 ± 0.01 | *  | 0.97 ± 0.01 | 1.08 ± 0.01  | *† | 0.97 ± 0.01† | 1.13 ± 0.01† | *  | 0.97 ± 0.01  | 1.10 ± 0.01  |
| <i>prkdc</i>      | 1.02 ± 0.01 | 0.94 ± 0.02 |    | 1.02 ± 0.02 | 0.96 ± 0.02  |    | 1.01 ± 0.03  | 0.99 ± 0.02  | *  | 1.03 ± 0.03  | 1.01 ± 0.03  |
| <i>prlr</i>       | 0.82 ± 0.14 | 1.08 ± 0.12 |    | 1.05 ± 0.09 | 1.19 ± 0.15  |    | 1.09 ± 0.09  | 0.98 ± 0.13  |    | 0.95 ± 0.10  | 0.88 ± 0.06  |
| <i>psen1</i>      | 0.99 ± 0.02 | 0.97 ± 0.01 | *  | 1.00 ± 0.01 | 1.02 ± 0.01  |    | 1.00 ± 0.01  | 1.00 ± 0.02  | *  | 1.01 ± 0.04  | 1.05 ± 0.03  |
| <i>ptdsr</i>      | 1.05 ± 0.02 | 0.89 ± 0.01 | *  | 1.01 ± 0.01 | 0.88 ± 0.01  | *  | 1.02 ± 0.01  | 0.86 ± 0.01  | *† | 1.11 ± 0.02  | 1.04 ± 0.01† |
| <i>pten</i>       | 0.98 ± 0.03 | 1.14 ± 0.07 | *  | 0.93 ± 0.03 | 1.01 ± 0.02  |    | 0.95 ± 0.04  | 1.05 ± 0.03  |    | 1.02 ± 0.04  | 1.01 ± 0.03  |
| <i>ptma</i>       | 1.06 ± 0.04 | 0.98 ± 0.06 |    | 1.06 ± 0.04 | 0.92 ± 0.04  |    | 1.00 ± 0.06  | 1.01 ± 0.04  |    | 1.08 ± 0.04  | 0.96 ± 0.05  |
| <i>pycard</i>     | 0.97 ± 0.03 | 1.24 ± 0.04 | *  | 0.90 ± 0.02 | 1.09 ± 0.03  | †  | 1.03 ± 0.02  | 1.14 ± 0.03  | *† | 0.83 ± 0.03† | 0.90 ± 0.02† |
| <i>rabep1</i>     | 0.91 ± 0.01 | 1.04 ± 0.02 | *† | 0.91 ± 0.01 | 1.09 ± 0.01† | *† | 0.98 ± 0.01† | 1.18 ± 0.01† |    | 0.92 ± 0.01  | 1.04 ± 0.01  |
| <i>rara</i>       | 1.19 ± 0.04 | 0.76 ± 0.02 | *  | 1.06 ± 0.03 | 0.73 ± 0.03  | *  | 1.11 ± 0.05  | 0.63 ± 0.02  | *  | 1.68 ± 0.09  | 1.15 ± 0.09  |
| <i>rgd1305695</i> | 1.08 ± 0.01 | 0.93 ± 0.02 |    | 1.07 ± 0.01 | 0.93 ± 0.01  |    | 1.07 ± 0.01  | 0.94 ± 0.01  |    | 1.03 ± 0.02  | 0.93 ± 0.01  |
| <i>rgd1310488</i> | 0.98 ± 0.01 | 1.08 ± 0.01 | *† | 0.98 ± 0.01 | 1.02 ± 0.01† | *† | 0.99 ± 0.01  | 0.99 ± 0.01† | *  | 0.95 ± 0.01  | 1.04 ± 0.01  |
| <i>ripk1</i>      | 1.08 ± 0.04 | 0.92 ± 0.07 |    | 1.02 ± 0.04 | 0.92 ± 0.03  |    | 1.08 ± 0.04  | 1.00 ± 0.07  |    | 1.05 ± 0.05  | 0.92 ± 0.04  |
| <i>ripk2</i>      | 1.00 ± 0.02 | 0.94 ± 0.03 |    | 1.03 ± 0.01 | 0.94 ± 0.03  | *  | 1.05 ± 0.02  | 1.04 ± 0.03  |    | 1.01 ± 0.02  | 0.90 ± 0.02  |

Supplemental Table 2 (continued)

|                  |             |             |    |              |              |    |              |              |    |             |              |
|------------------|-------------|-------------|----|--------------|--------------|----|--------------|--------------|----|-------------|--------------|
| <i>ripk3</i>     | 1.05 ± 0.02 | 1.00 ± 0.03 |    | 1.05 ± 0.02  | 1.00 ± 0.02  |    | 1.05 ± 0.02  | 0.94 ± 0.01  | *  | 1.01 ± 0.02 | 0.91 ± 0.02  |
| <i>rnf34</i>     | 0.97 ± 0.02 | 0.91 ± 0.03 | *  | 1.03 ± 0.01  | 0.98 ± 0.01  | *† | 0.98 ± 0.01  | 1.04 ± 0.01† | *  | 1.04 ± 0.01 | 0.98 ± 0.02  |
| <i>rnf7</i>      | 0.97 ± 0.01 | 1.01 ± 0.02 |    | 0.98 ± 0.01  | 0.99 ± 0.02  |    | 1.02 ± 0.02  | 1.01 ± 0.02  |    | 1.01 ± 0.01 | 1.01 ± 0.02  |
| <i>rock1</i>     | 1.08 ± 0.04 | 0.96 ± 0.02 |    | 1.04 ± 0.03  | 0.98 ± 0.03  |    | 1.10 ± 0.03  | 0.90 ± 0.03  |    | 1.00 ± 0.05 | 0.93 ± 0.03  |
| <i>rtn4</i>      | 0.93 ± 0.02 | 0.97 ± 0.06 | *† | 0.97 ± 0.02  | 1.23 ± 0.03† | *† | 0.93 ± 0.02  | 1.23 ± 0.02† | *† | 0.89 ± 0.02 | 1.21 ± 0.04† |
| <i>rutbc3</i>    | 0.93 ± 0.01 | 1.17 ± 0.01 | *  | 0.89 ± 0.01  | 1.12 ± 0.01  |    | 0.93 ± 0.01  | 1.13 ± 0.01  | *† | 0.92 ± 0.01 | 1.07 ± 0.02† |
| <i>s100b</i>     | 0.79 ± 0.10 | 1.00 ± 0.13 | *  | 1.04 ± 0.09  | 1.10 ± 0.09  |    | 0.90 ± 0.09  | 0.98 ± 0.08  |    | 0.81 ± 0.08 | 1.03 ± 0.11  |
| <i>sart1</i>     | 1.07 ± 0.02 | 1.04 ± 0.02 | *  | 1.00 ± 0.02  | 1.00 ± 0.02  |    | 1.05 ± 0.01  | 0.96 ± 0.01  | *  | 0.98 ± 0.02 | 0.94 ± 0.01  |
| <i>scn2a1</i>    | 0.93 ± 0.02 | 1.24 ± 0.03 | *  | 0.91 ± 0.02  | 1.14 ± 0.02  |    | 0.93 ± 0.02  | 1.15 ± 0.01  | *  | 0.89 ± 0.03 | 1.07 ± 0.02  |
| <i>sema4d</i>    | 0.92 ± 0.05 | 1.22 ± 0.12 |    | 0.92 ± 0.06  | 0.99 ± 0.06  |    | 0.96 ± 0.07  | 1.08 ± 0.08  |    | 1.05 ± 0.09 | 1.12 ± 0.11  |
| <i>sema6a</i>    | 0.99 ± 0.14 | 0.95 ± 0.10 |    | 0.90 ± 0.09  | 0.97 ± 0.10  |    | 1.10 ± 0.09  | 1.07 ± 0.08  |    | 1.08 ± 0.13 | 0.96 ± 0.06  |
| <i>senp17</i>    | 0.95 ± 0.10 | 1.03 ± 0.09 | †  | 1.32 ± 0.15† | 0.96 ± 0.07  |    | 0.97 ± 0.10  | 1.06 ± 0.10  |    | 0.91 ± 0.08 | 1.03 ± 0.07  |
| <i>serpina3</i>  | 0.96 ± 0.09 | 1.05 ± 0.10 |    | 1.07 ± 0.12  | 0.94 ± 0.08  |    | 0.89 ± 0.06  | 1.08 ± 0.11  |    | 0.90 ± 0.06 | 1.04 ± 0.07  |
| <i>serpinb9e</i> | 0.91 ± 0.10 | 1.07 ± 0.11 |    | 1.09 ± 0.11  | 1.07 ± 0.07  |    | 0.91 ± 0.06  | 1.12 ± 0.10  |    | 0.89 ± 0.06 | 1.06 ± 0.08  |
| <i>sfrp2</i>     | 0.94 ± 0.10 | 1.10 ± 0.10 |    | 0.98 ± 0.12  | 0.99 ± 0.08  |    | 1.01 ± 0.10  | 1.13 ± 0.10  |    | 0.90 ± 0.07 | 1.08 ± 0.07  |
| <i>sgk</i>       | 1.14 ± 0.12 | 0.87 ± 0.06 |    | 1.04 ± 0.11  | 0.91 ± 0.08  | *† | 1.11 ± 0.07  | 1.88 ± 0.02† |    | 0.89 ± 0.06 | 0.96 ± 0.08  |
| <i>sgkl</i>      | 0.94 ± 0.04 | 1.13 ± 0.08 |    | 0.92 ± 0.04  | 1.22 ± 0.06  |    | 0.94 ± 0.05  | 1.25 ± 0.10  | *  | 0.88 ± 0.06 | 0.95 ± 0.06  |
| <i>sgpp1</i>     | 0.93 ± 0.01 | 1.12 ± 0.03 | *  | 0.90 ± 0.02  | 1.02 ± 0.01  | *  | 0.92 ± 0.01  | 1.04 ± 0.02  | *  | 1.00 ± 0.02 | 1.16 ± 0.02  |
| <i>sh3glb1</i>   | 0.98 ± 0.02 | 0.98 ± 0.05 | *  | 1.03 ± 0.02  | 1.05 ± 0.03  |    | 1.00 ± 0.03  | 1.04 ± 0.03  |    | 0.97 ± 0.01 | 1.00 ± 0.02  |
| <i>sh3kbp1</i>   | 0.93 ± 0.04 | 1.12 ± 0.04 | *  | 0.86 ± 0.04  | 1.01 ± 0.04  |    | 0.81 ± 0.06  | 1.17 ± 0.06  | †  | 0.88 ± 0.04 | 1.37 ± 0.06† |
| <i>sh3md2</i>    | 1.21 ± 0.22 | 1.15 ± 0.14 |    | 1.13 ± 0.14  | 0.87 ± 0.07  |    | 1.25 ± 0.14  | 1.17 ± 0.14  |    | 1.31 ± 0.14 | 0.81 ± 0.05  |
| <i>siah2</i>     | 1.04 ± 0.02 | 0.94 ± 0.02 | *  | 0.98 ± 0.05  | 0.89 ± 0.02  |    | 1.04 ± 0.03  | 0.97 ± 0.04  |    | 1.07 ± 0.02 | 0.94 ± 0.03  |
| <i>snca</i>      | 0.98 ± 0.10 | 1.00 ± 0.12 |    | 1.09 ± 0.10  | 0.98 ± 0.10  |    | 1.03 ± 0.07  | 1.01 ± 0.08  |    | 0.97 ± 0.06 | 0.95 ± 0.04  |
| <i>sod1</i>      | 1.00 ± 0.01 | 1.05 ± 0.01 |    | 1.01 ± 0.01  | 1.05 ± 0.01  | *† | 0.98 ± 0.01  | 0.99 ± 0.01† | *  | 0.96 ± 0.02 | 1.00 ± 0.01  |
| <i>son</i>       | 1.06 ± 0.01 | 0.99 ± 0.01 | *  | 1.02 ± 0.01  | 0.95 ± 0.01  | *† | 1.04 ± 0.01  | 0.89 ± 0.01† | *  | 1.02 ± 0.02 | 0.92 ± 0.01  |
| <i>spata3</i>    | 0.93 ± 0.06 | 0.96 ± 0.09 | *  | 1.22 ± 0.08  | 1.08 ± 0.09  | *  | 1.22 ± 0.17  | 1.08 ± 0.10  |    | 1.09 ± 0.08 | 0.81 ± 0.10  |
| <i>spg11</i>     | 0.99 ± 0.05 | 0.88 ± 0.04 | *† | 1.01 ± 0.05  | 1.09 ± 0.04† | *  | 1.01 ± 0.04  | 1.05 ± 0.03  |    | 0.98 ± 0.05 | 0.98 ± 0.05  |
| <i>sphk2</i>     | 1.03 ± 0.02 | 1.01 ± 0.03 |    | 1.00 ± 0.02  | 1.03 ± 0.02  |    | 1.01 ± 0.02  | 0.97 ± 0.02  | *  | 0.94 ± 0.02 | 0.94 ± 0.02  |
| <i>spp1</i>      | 0.95 ± 0.10 | 1.07 ± 0.10 |    | 1.17 ± 0.13  | 0.98 ± 0.07  |    | 1.16 ± 0.15  | 1.12 ± 0.10  |    | 0.91 ± 0.06 | 1.04 ± 0.08  |
| <i>sqstm1</i>    | 0.89 ± 0.02 | 1.21 ± 0.02 | †  | 0.88 ± 0.01  | 1.32 ± 0.01† | *† | 0.93 ± 0.02  | 1.40 ± 0.03† | *  | 0.80 ± 0.04 | 1.13 ± 0.03  |
| <i>stambp</i>    | 0.92 ± 0.01 | 1.11 ± 0.04 |    | 0.90 ± 0.02  | 1.05 ± 0.02  |    | 0.95 ± 0.01  | 1.04 ± 0.01  |    | 0.97 ± 0.05 | 1.06 ± 0.02  |
| <i>stk17b</i>    | 1.12 ± 0.03 | 0.86 ± 0.04 | †  | 1.04 ± 0.03  | 0.98 ± 0.05  | †  | 1.02 ± 0.04  | 0.98 ± 0.04  |    | 1.08 ± 0.04 | 0.89 ± 0.04  |
| <i>stk3</i>      | 0.99 ± 0.02 | 1.02 ± 0.02 |    | 0.99 ± 0.02  | 0.98 ± 0.01  |    | 1.01 ± 0.01  | 0.98 ± 0.01  |    | 1.03 ± 0.03 | 0.98 ± 0.02  |
| <i>stk4</i>      | 0.99 ± 0.04 | 1.04 ± 0.08 |    | 1.01 ± 0.05  | 0.93 ± 0.03  |    | 0.95 ± 0.04  | 1.01 ± 0.05  |    | 1.07 ± 0.05 | 0.98 ± 0.04  |
| <i>stnl</i>      | 0.88 ± 0.04 | 1.11 ± 0.04 |    | 0.90 ± 0.04  | 1.07 ± 0.05  |    | 0.86 ± 0.05  | 1.27 ± 0.07  |    | 0.93 ± 0.03 | 1.11 ± 0.05  |
| <i>tax1bp1</i>   | 0.96 ± 0.01 | 1.02 ± 0.02 | †  | 0.96 ± 0.01  | 1.08 ± 0.01† |    | 0.96 ± 0.01  | 1.08 ± 0.01  | *  | 0.99 ± 0.02 | 1.07 ± 0.02  |
| <i>tcf7</i>      | 0.95 ± 0.02 | 1.20 ± 0.06 | †  | 1.10 ± 0.08  | 0.90 ± 0.07† | †  | 1.10 ± 0.09  | 1.00 ± 0.07  | †  | 1.05 ± 0.10 | 0.91 ± 0.07† |
| <i>tcfap2a</i>   | 0.97 ± 0.09 | 1.08 ± 0.11 |    | 1.04 ± 0.14  | 0.91 ± 0.10  |    | 0.95 ± 0.06  | 1.06 ± 0.11  |    | 0.93 ± 0.06 | 1.09 ± 0.08  |
| <i>tegt</i>      | 0.94 ± 0.01 | 0.97 ± 0.02 | *  | 0.99 ± 0.02  | 1.06 ± 0.01  | *† | 0.97 ± 0.02  | 1.16 ± 0.02† | *  | 0.97 ± 0.02 | 1.05 ± 0.01  |
| <i>tesk2</i>     | 1.13 ± 0.05 | 0.85 ± 0.05 |    | 1.21 ± 0.08  | 0.82 ± 0.07  |    | 1.21 ± 0.07  | 0.86 ± 0.07  |    | 1.22 ± 0.09 | 0.94 ± 0.06  |
| <i>tfpt</i>      | 0.98 ± 0.03 | 0.94 ± 0.04 |    | 1.01 ± 0.03  | 1.01 ± 0.02  |    | 0.99 ± 0.02  | 0.99 ± 0.05  | *  | 1.00 ± 0.03 | 1.07 ± 0.02  |
| <i>tgfa</i>      | 0.99 ± 0.09 | 1.08 ± 0.10 |    | 1.18 ± 0.12  | 0.99 ± 0.08  |    | 1.01 ± 0.10  | 1.13 ± 0.10  |    | 0.77 ± 0.09 | 1.07 ± 0.07  |
| <i>tgm2</i>      | 1.15 ± 0.09 | 1.51 ± 0.07 | *† | 0.74 ± 0.07† | 0.64 ± 0.04† | *† | 0.83 ± 0.07† | 0.78 ± 0.07† |    | 1.09 ± 0.08 | 1.47 ± 0.14  |
| <i>thap1</i>     | 1.20 ± 0.12 | 1.01 ± 0.10 |    | 1.06 ± 0.06  | 0.94 ± 0.04  |    | 1.03 ± 0.05  | 0.89 ± 0.04  |    | 1.06 ± 0.04 | 0.99 ± 0.04  |
| <i>thyl</i>      | 0.93 ± 0.02 | 1.15 ± 0.02 |    | 0.87 ± 0.02  | 1.16 ± 0.02  |    | 0.97 ± 0.02  | 1.12 ± 0.02  | *† | 0.94 ± 0.02 | 0.99 ± 0.02† |
| <i>tial</i>      | 1.12 ± 0.04 | 0.96 ± 0.02 |    | 1.17 ± 0.03  | 0.92 ± 0.02  |    | 1.05 ± 0.05  | 0.96 ± 0.03  | †  | 1.15 ± 0.03 | 0.87 ± 0.03† |
| <i>tial1</i>     | 1.07 ± 0.02 | 0.90 ± 0.02 |    | 1.09 ± 0.02  | 0.87 ± 0.02  | *  | 1.01 ± 0.02  | 0.88 ± 0.02  | *  | 1.14 ± 0.03 | 0.98 ± 0.02  |
| <i>tieg</i>      | 1.15 ± 0.03 | 0.87 ± 0.03 | †  | 1.18 ± 0.03  | 0.78 ± 0.02† | *  | 1.12 ± 0.03  | 0.80 ± 0.02  | *  | 1.27 ± 0.03 | 0.88 ± 0.03  |
| <i>timp3</i>     | 0.88 ± 0.09 | 0.83 ± 0.08 |    | 1.07 ± 0.12  | 0.98 ± 0.09  | *  | 1.20 ± 0.09  | 1.13 ± 0.13  | *  | 1.34 ± 0.15 | 1.04 ± 0.08  |
| <i>tnf</i>       | 1.19 ± 0.13 | 0.96 ± 0.10 |    | 1.07 ± 0.10  | 0.93 ± 0.11  |    | 1.14 ± 0.14  | 1.06 ± 0.08  |    | 0.90 ± 0.11 | 1.02 ± 0.14  |
| <i>tnfaip8</i>   | 1.18 ± 0.16 | 0.92 ± 0.12 |    | 0.94 ± 0.09  | 0.93 ± 0.08  | *  | 1.96 ± 0.36  | 1.44 ± 0.20  |    | 0.90 ± 0.11 | 0.95 ± 0.08  |
| <i>tnfrsf10b</i> | 0.90 ± 0.06 | 1.02 ± 0.10 |    | 1.10 ± 0.12  | 0.96 ± 0.08  |    | 0.92 ± 0.05  | 1.10 ± 0.10  |    | 0.91 ± 0.06 | 1.05 ± 0.07  |
| <i>tnfrsf11b</i> | 1.01 ± 0.10 | 1.07 ± 0.10 |    | 1.12 ± 0.09  | 0.96 ± 0.08  |    | 0.91 ± 0.06  | 1.11 ± 0.10  |    | 0.89 ± 0.07 | 1.05 ± 0.07  |
| <i>tnfrsf1a</i>  | 1.06 ± 0.03 | 1.00 ± 0.03 |    | 1.09 ± 0.03  | 1.00 ± 0.02  | †  | 1.07 ± 0.03  | 0.91 ± 0.02† | *  | 1.01 ± 0.02 | 0.91 ± 0.02  |
| <i>tnfrsf6</i>   | 0.56 ± 0.02 | 1.63 ± 0.05 | *  | 0.64 ± 0.04  | 1.92 ± 0.06  |    | 0.57 ± 0.02  | 1.55 ± 0.05  | *  | 0.52 ± 0.03 | 1.39 ± 0.05  |
| <i>tnfsf10</i>   | 0.99 ± 0.10 | 1.08 ± 0.10 |    | 1.09 ± 0.11  | 0.92 ± 0.11  |    | 1.03 ± 0.10  | 1.10 ± 0.11  |    | 0.95 ± 0.08 | 1.04 ± 0.07  |
| <i>tnfsf12</i>   | 1.03 ± 0.01 | 0.94 ± 0.02 | *  | 1.08 ± 0.02  | 1.01 ± 0.02  |    | 1.04 ± 0.02  | 0.96 ± 0.02  |    | 0.97 ± 0.03 | 0.95 ± 0.02  |
| <i>tnfsf18</i>   | 0.98 ± 0.09 | 1.06 ± 0.10 |    | 1.08 ± 0.11  | 0.91 ± 0.10  |    | 0.96 ± 0.11  | 1.19 ± 0.10  |    | 0.92 ± 0.09 | 1.05 ± 0.06  |

| Supplemental Table 2 (continued) |             |             |   |             |              |    |              |              |   |             |             |
|----------------------------------|-------------|-------------|---|-------------|--------------|----|--------------|--------------|---|-------------|-------------|
| <i>tnfsf5ip1</i>                 | 0.97 ± 0.01 | 1.03 ± 0.02 |   | 0.95 ± 0.02 | 1.03 ± 0.02  |    | 0.94 ± 0.01  | 1.06 ± 0.02  |   | 0.97 ± 0.02 | 1.05 ± 0.02 |
| <i>tnfsf6</i>                    | 0.93 ± 0.05 | 1.16 ± 0.08 |   | 0.89 ± 0.03 | 1.18 ± 0.05  |    | 0.91 ± 0.03  | 1.24 ± 0.08  |   | 0.90 ± 0.06 | 1.00 ± 0.06 |
| <i>topors</i>                    | 1.08 ± 0.03 | 0.93 ± 0.03 |   | 1.09 ± 0.02 | 0.91 ± 0.03  |    | 1.03 ± 0.04  | 0.89 ± 0.02  |   | 1.01 ± 0.07 | 1.00 ± 0.03 |
| <i>tp53</i>                      | 0.98 ± 0.04 | 1.04 ± 0.02 | * | 0.94 ± 0.05 | 0.87 ± 0.03  | *  | 0.87 ± 0.04  | 0.91 ± 0.05  | † | 1.06 ± 0.02 | 0.94 ± 0.05 |
| <i>tp73</i>                      | 1.10 ± 0.09 | 0.92 ± 0.10 |   | 1.09 ± 0.11 | 1.05 ± 0.10  |    | 1.20 ± 0.10  | 0.99 ± 0.10  |   | 0.90 ± 0.10 | 0.82 ± 0.05 |
| <i>tp1</i>                       | 1.03 ± 0.02 | 0.98 ± 0.03 |   | 1.01 ± 0.01 | 0.96 ± 0.01  |    | 1.02 ± 0.02  | 1.01 ± 0.01  |   | 1.00 ± 0.03 | 1.01 ± 0.03 |
| <i>tra1</i>                      | 0.97 ± 0.04 | 0.99 ± 0.04 |   | 1.01 ± 0.03 | 0.95 ± 0.03  |    | 0.99 ± 0.04  | 0.97 ± 0.03  |   | 0.99 ± 0.03 | 1.06 ± 0.03 |
| <i>tradd</i>                     | 0.98 ± 0.01 | 1.00 ± 0.01 | * | 1.01 ± 0.01 | 1.04 ± 0.01  | *  | 1.02 ± 0.01  | 1.01 ± 0.01  | * | 0.97 ± 0.01 | 0.98 ± 0.01 |
| <i>trib3</i>                     | 0.85 ± 0.02 | 0.93 ± 0.02 | † | 0.82 ± 0.03 | 1.03 ± 0.03† | *† | 0.96 ± 0.04† | 1.35 ± 0.03† | * | 1.03 ± 0.02 | 1.19 ± 0.04 |
| <i>trp53bp2</i>                  | 1.01 ± 0.01 | 1.01 ± 0.02 | * | 0.96 ± 0.02 | 0.98 ± 0.02  |    | 0.99 ± 0.02  | 1.04 ± 0.02  |   | 0.99 ± 0.03 | 1.01 ± 0.02 |
| <i>trp53inp1</i>                 | 0.71 ± 0.03 | 1.43 ± 0.06 |   | 0.68 ± 0.04 | 1.46 ± 0.05  |    | 0.67 ± 0.03  | 1.36 ± 0.06  |   | 0.69 ± 0.03 | 1.42 ± 0.05 |
| <i>trp63</i>                     | 1.07 ± 0.10 | 0.98 ± 0.10 |   | 1.00 ± 0.09 | 0.99 ± 0.08  |    | 1.09 ± 0.09  | 1.03 ± 0.11  |   | 0.89 ± 0.06 | 1.03 ± 0.07 |
| <i>tsarg1</i>                    | 1.29 ± 0.10 | 0.85 ± 0.03 | * | 1.50 ± 0.12 | 1.04 ± 0.08  |    | 1.16 ± 0.09  | 0.80 ± 0.08  | * | 1.08 ± 0.07 | 0.77 ± 0.08 |
| <i>ttc11</i>                     | 1.00 ± 0.01 | 1.03 ± 0.01 | * | 0.97 ± 0.01 | 1.01 ± 0.01  | *  | 0.99 ± 0.01  | 1.00 ± 0.01  | * | 1.03 ± 0.01 | 1.03 ± 0.01 |
| <i>twist2</i>                    | 1.11 ± 0.05 | 0.96 ± 0.09 |   | 1.08 ± 0.05 | 0.90 ± 0.06  |    | 1.10 ± 0.04  | 0.88 ± 0.05  |   | 1.11 ± 0.05 | 0.95 ± 0.07 |
| <i>txnl1</i>                     | 0.98 ± 0.01 | 1.01 ± 0.01 | * | 1.02 ± 0.01 | 1.03 ± 0.01  |    | 0.98 ± 0.01  | 1.00 ± 0.01  | * | 1.00 ± 0.01 | 1.03 ± 0.01 |
| <i>ube1c</i>                     | 1.02 ± 0.03 | 0.97 ± 0.05 |   | 1.06 ± 0.02 | 0.99 ± 0.03  |    | 1.01 ± 0.04  | 0.91 ± 0.04  |   | 0.99 ± 0.04 | 0.95 ± 0.03 |
| <i>ube4b</i>                     | 1.01 ± 0.01 | 1.00 ± 0.02 |   | 1.04 ± 0.01 | 0.99 ± 0.01  |    | 1.00 ± 0.01  | 0.96 ± 0.02  |   | 1.01 ± 0.02 | 0.98 ± 0.01 |
| <i>unc5a</i>                     | 1.10 ± 0.04 | 1.13 ± 0.06 | * | 1.00 ± 0.05 | 1.05 ± 0.04  |    | 1.01 ± 0.06  | 1.09 ± 0.06  | * | 1.00 ± 0.06 | 0.96 ± 0.05 |
| <i>unc5b</i>                     | 0.90 ± 0.03 | 1.06 ± 0.04 |   | 0.88 ± 0.03 | 1.14 ± 0.03  | *  | 0.95 ± 0.03  | 1.23 ± 0.06  |   | 0.96 ± 0.04 | 1.09 ± 0.04 |
| <i>v1rd22</i>                    | 1.24 ± 0.17 | 0.99 ± 0.06 | * | 0.88 ± 0.13 | 0.87 ± 0.08  | †  | 1.12 ± 0.13  | 1.41 ± 0.21  |   | 1.44 ± 0.22 | 0.97 ± 0.13 |
| <i>vdr</i>                       | 0.96 ± 0.08 | 1.15 ± 0.09 |   | 1.14 ± 0.13 | 1.07 ± 0.08  |    | 1.03 ± 0.11  | 1.08 ± 0.10  |   | 0.96 ± 0.05 | 1.03 ± 0.07 |
| <i>vegf</i>                      | 0.98 ± 0.03 | 1.06 ± 0.09 | * | 0.85 ± 0.04 | 0.81 ± 0.03  |    | 0.91 ± 0.04  | 1.00 ± 0.07  | * | 1.57 ± 0.08 | 1.50 ± 0.07 |
| <i>wigl</i>                      | 0.81 ± 0.01 | 1.35 ± 0.04 | * | 0.75 ± 0.02 | 1.31 ± 0.03  | *† | 0.79 ± 0.02  | 1.18 ± 0.02† |   | 0.78 ± 0.01 | 1.37 ± 0.04 |
| <i>wwox</i>                      | 0.95 ± 0.03 | 0.90 ± 0.03 | † | 0.92 ± 0.03 | 1.13 ± 0.03† | *  | 1.13 ± 0.04  | 1.05 ± 0.05  |   | 0.95 ± 0.04 | 1.06 ± 0.07 |
| <i>ywhah</i>                     | 0.96 ± 0.01 | 1.10 ± 0.02 |   | 0.94 ± 0.01 | 1.11 ± 0.01  |    | 0.96 ± 0.01  | 1.09 ± 0.01  | * | 0.90 ± 0.03 | 1.02 ± 0.01 |
| <i>zd10b</i>                     | 1.07 ± 0.02 | 0.86 ± 0.02 | * | 1.11 ± 0.03 | 0.92 ± 0.03  |    | 1.08 ± 0.01  | 0.89 ± 0.02  |   | 1.07 ± 0.02 | 0.90 ± 0.01 |
| <i>zfp145</i>                    | 0.93 ± 0.08 | 1.09 ± 0.09 |   | 0.96 ± 0.08 | 0.89 ± 0.13  | *  | 1.25 ± 0.13  | 1.26 ± 0.08  |   | 0.91 ± 0.08 | 0.89 ± 0.08 |
| <i>zfp162</i>                    | 1.16 ± 0.03 | 0.85 ± 0.02 |   | 1.16 ± 0.03 | 0.93 ± 0.02  | *  | 1.18 ± 0.03  | 0.93 ± 0.01  |   | 1.17 ± 0.03 | 0.93 ± 0.02 |
| <i>zfp346</i>                    | 1.09 ± 0.05 | 0.96 ± 0.10 |   | 0.97 ± 0.06 | 0.99 ± 0.10  |    | 0.95 ± 0.05  | 0.91 ± 0.05  |   | 1.10 ± 0.08 | 0.99 ± 0.06 |
| <i>zfp91</i>                     | 1.11 ± 0.07 | 1.03 ± 0.11 |   | 1.03 ± 0.06 | 0.91 ± 0.05  |    | 1.01 ± 0.07  | 1.03 ± 0.08  |   | 1.16 ± 0.08 | 0.98 ± 0.06 |

Normalized expression ratios are given as mean ± SE obtained from eight independent samples in each group, each run on a separate array. Several of the values reported in this table have appeared in previous studies of other gene groupings [1-6].

\*Significant main treatment effect in two-factor ANOVA (treatment, region).

†Interaction of treatment × time; then, † denotes significant treatment effect for a given time point.

#### Global statistical analysis of Table 1: ANOVA factors of treatment, gene, time<sup>§</sup>

All treatments: treatment main effect,  $p < 0.0001$ ; treatment × gene,  $p < 0.0001$ ; treatment × time,  $p < 0.0005$ ; treatment × gene × time,  $p < 0.0001$

Control vs. Diazinon: treatment main effect,  $p < 0.009$ ; treatment × gene,  $p < 0.0001$ ; treatment × time,  $p < 0.05$ ; treatment × gene × time,  $p < 0.0001$

Control vs. Dieldrin: treatment main effect,  $p < 0.0001$ ; treatment × gene,  $p < 0.0001$ ; treatment × time,  $p < 0.003$ ; treatment × gene × time,  $p < 0.0001$

Control vs. Ni<sup>2+</sup>: treatment main effect,  $p < 0.0001$ ; treatment × gene,  $p < 0.0001$ ; treatment × gene × time,  $p < 0.005$

<sup>§</sup>results shown include only treatment effects and interactions of treatment with other variables

**REFERENCES**

- [1] A.A. Adigun, F.J. Seidler, T.A. Slotkin, Disparate developmental neurotoxicants converge on the cyclic AMP signaling cascade, revealed by transcriptional profiles in vitro and in vivo, *Brain Res* 1316 (2010) 1-16.
- [2] T.A. Slotkin, F.J. Seidler, Developmental exposure to organophosphates triggers transcriptional changes in genes associated with Parkinson's Disease in vitro and in vivo, *Brain Res Bull* 876 (2011) 340-347.
- [3] T.A. Slotkin, F.J. Seidler, Diverse neurotoxicants converge on gene expression for neuropeptides and their receptors in an in vitro model of neurodifferentiation: effects of chlorpyrifos, diazinon, dieldrin and divalent nickel in PC12 cells, *Brain Res* 1353 (2010) 36-52.
- [4] T.A. Slotkin, F.J. Seidler, Oxidative and excitatory mechanisms of developmental neurotoxicity: transcriptional profiles for chlorpyrifos, diazinon, dieldrin and divalent nickel in PC12 cells, *Environ Health Perspect* 117 (2009) 587-596.
- [5] T.A. Slotkin, F.J. Seidler, Protein kinase C is a target for diverse developmental neurotoxicants: transcriptional responses to chlorpyrifos, diazinon, dieldrin and divalent nickel in PC12 cells, *Brain Res* 1263 (2009) 23-32.
- [6] T.A. Slotkin, F.J. Seidler, F. Fumagalli, Unrelated developmental neurotoxicants elicit similar transcriptional profiles for effects on neurotrophic factors and their receptors in an in vitro model, *Neurotoxicol Teratol* 32 (2010) 42-51.
